# Supplementary material
Source: publisher site journal article supplement (https://www.dovepress.com/article/supplementary_file/598767/598767%20Revised%20Supplementary%20Materials.docx)
Supplement: Supplementary file 1 [file 598767%20Revised%20Supplementary%20Materials.docx]

**Supplementary Figures**

**
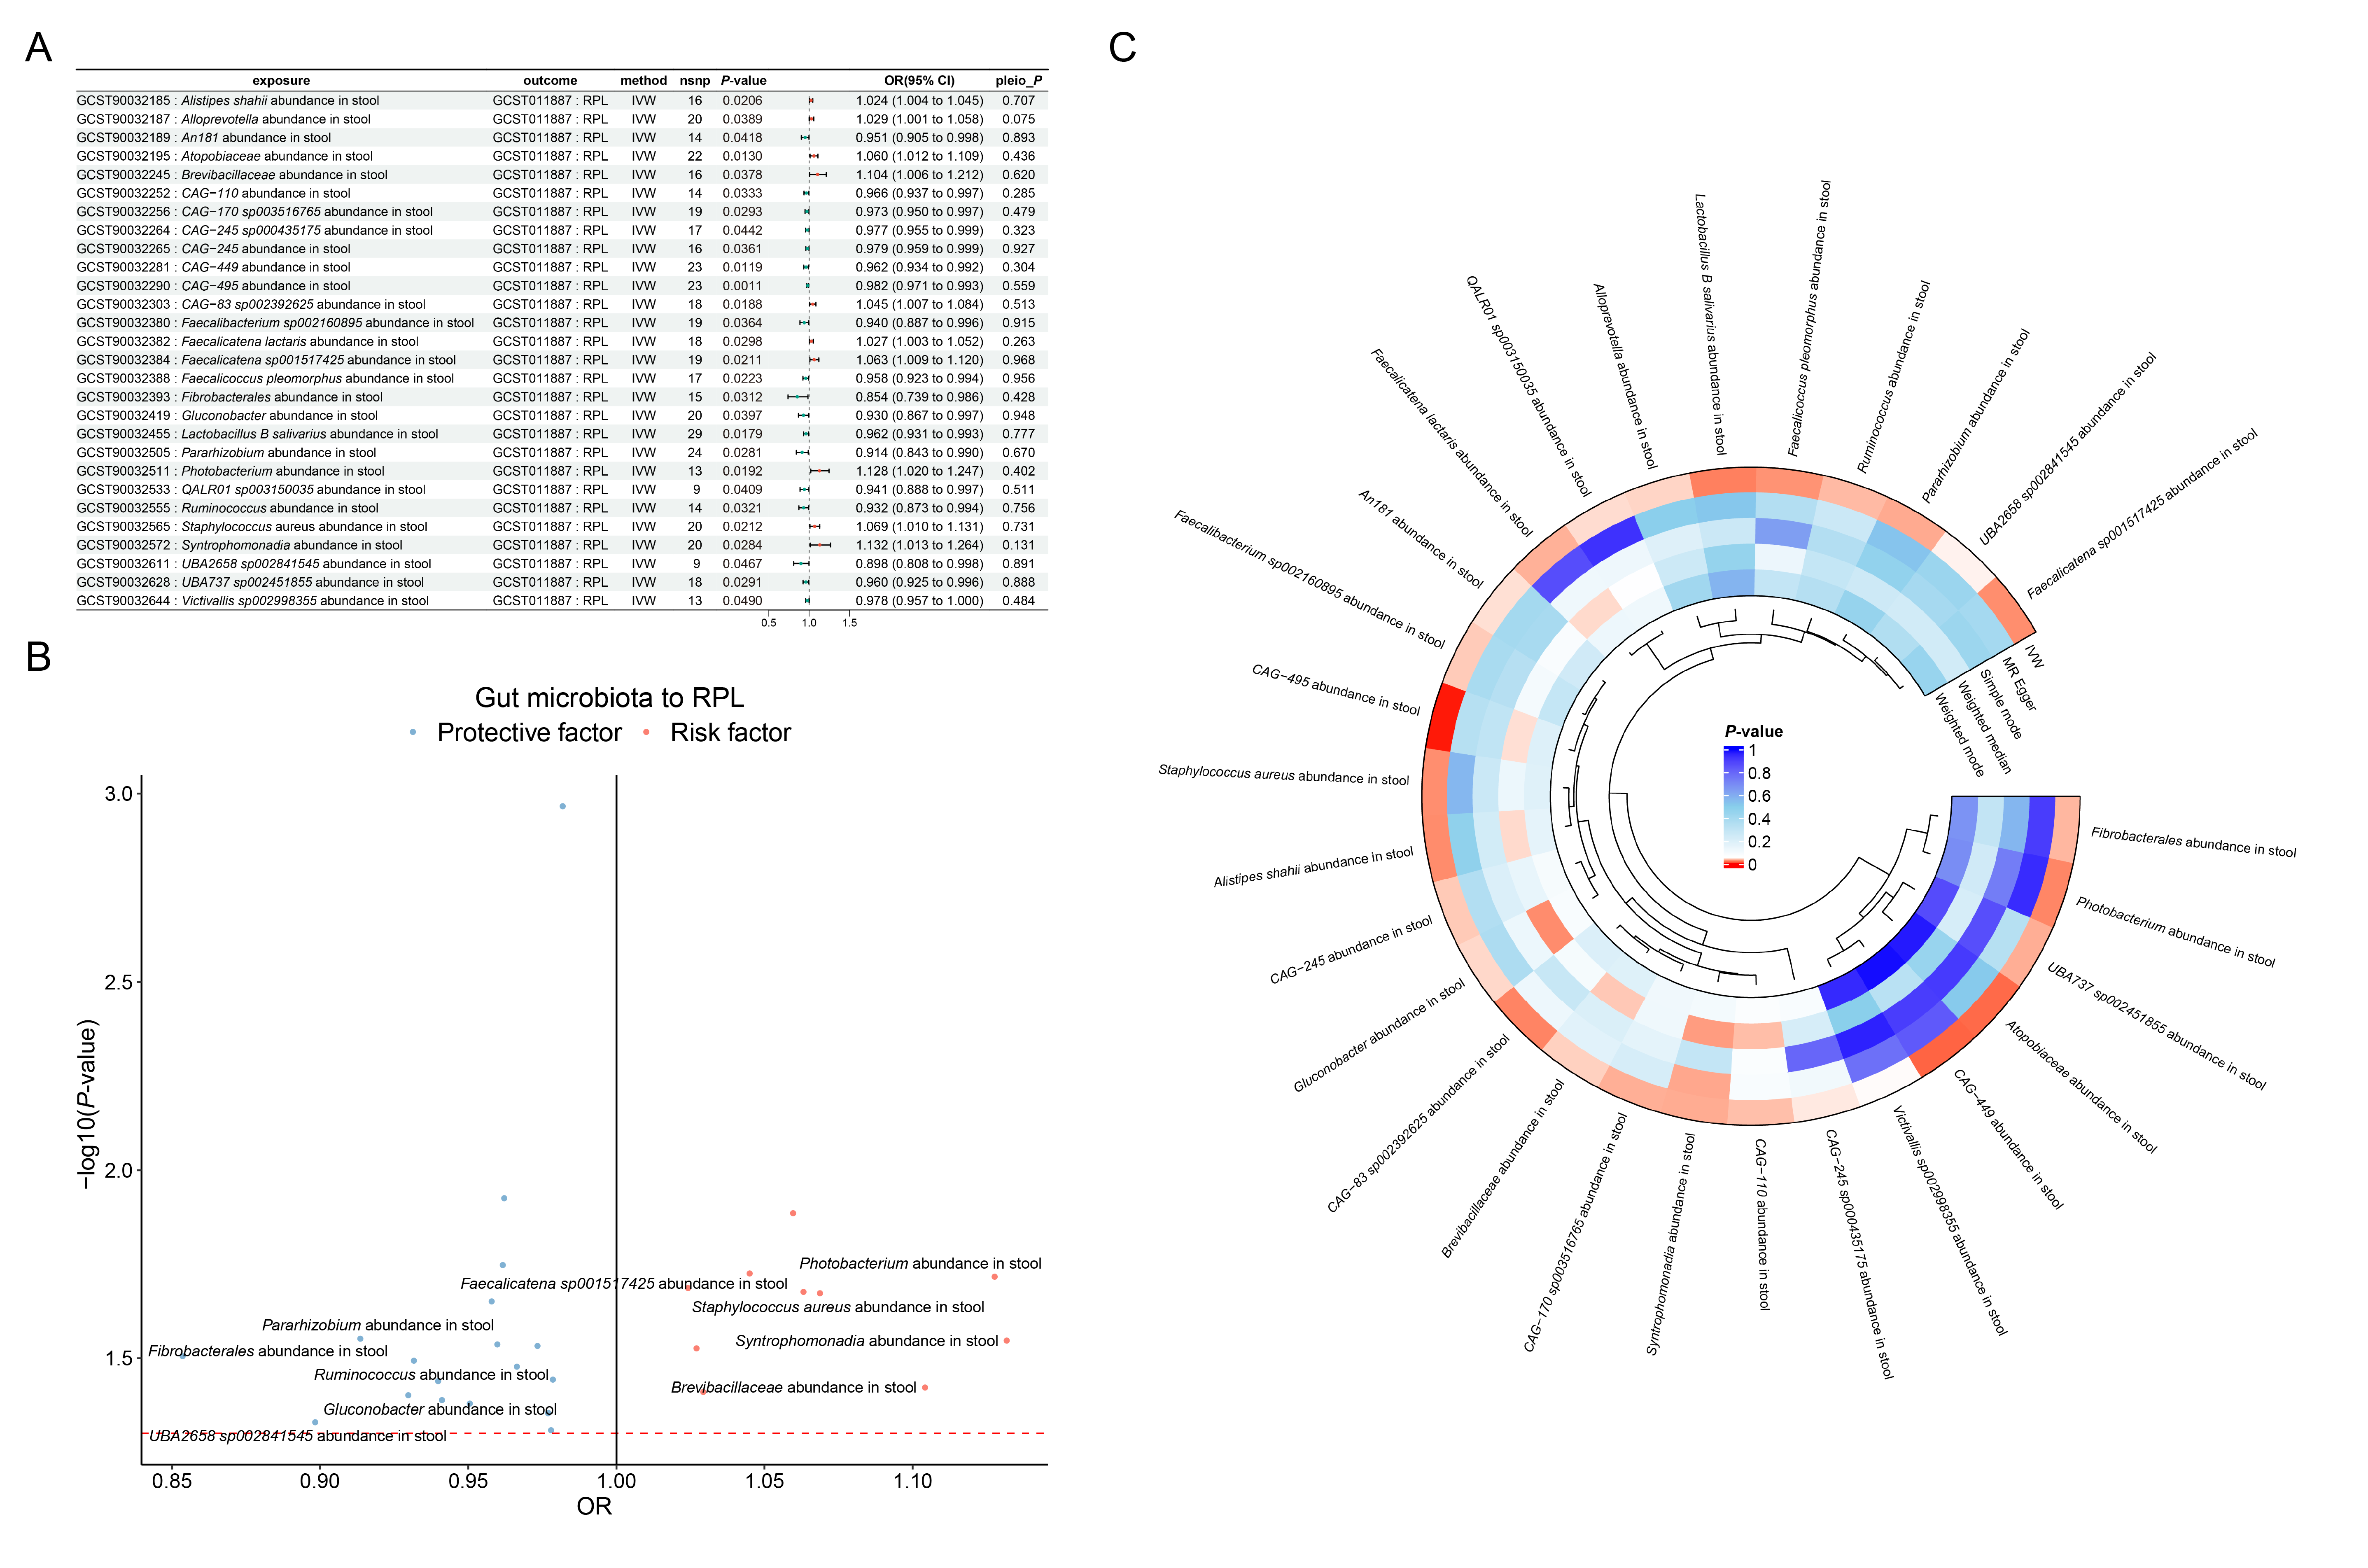
**

**Figure S1** Causal association of gut microbiota with Recurrent pregnancy loss (RPL). (**A**) The forest diagram; (**B**) The volcano diagram; (**C**) The heat map.


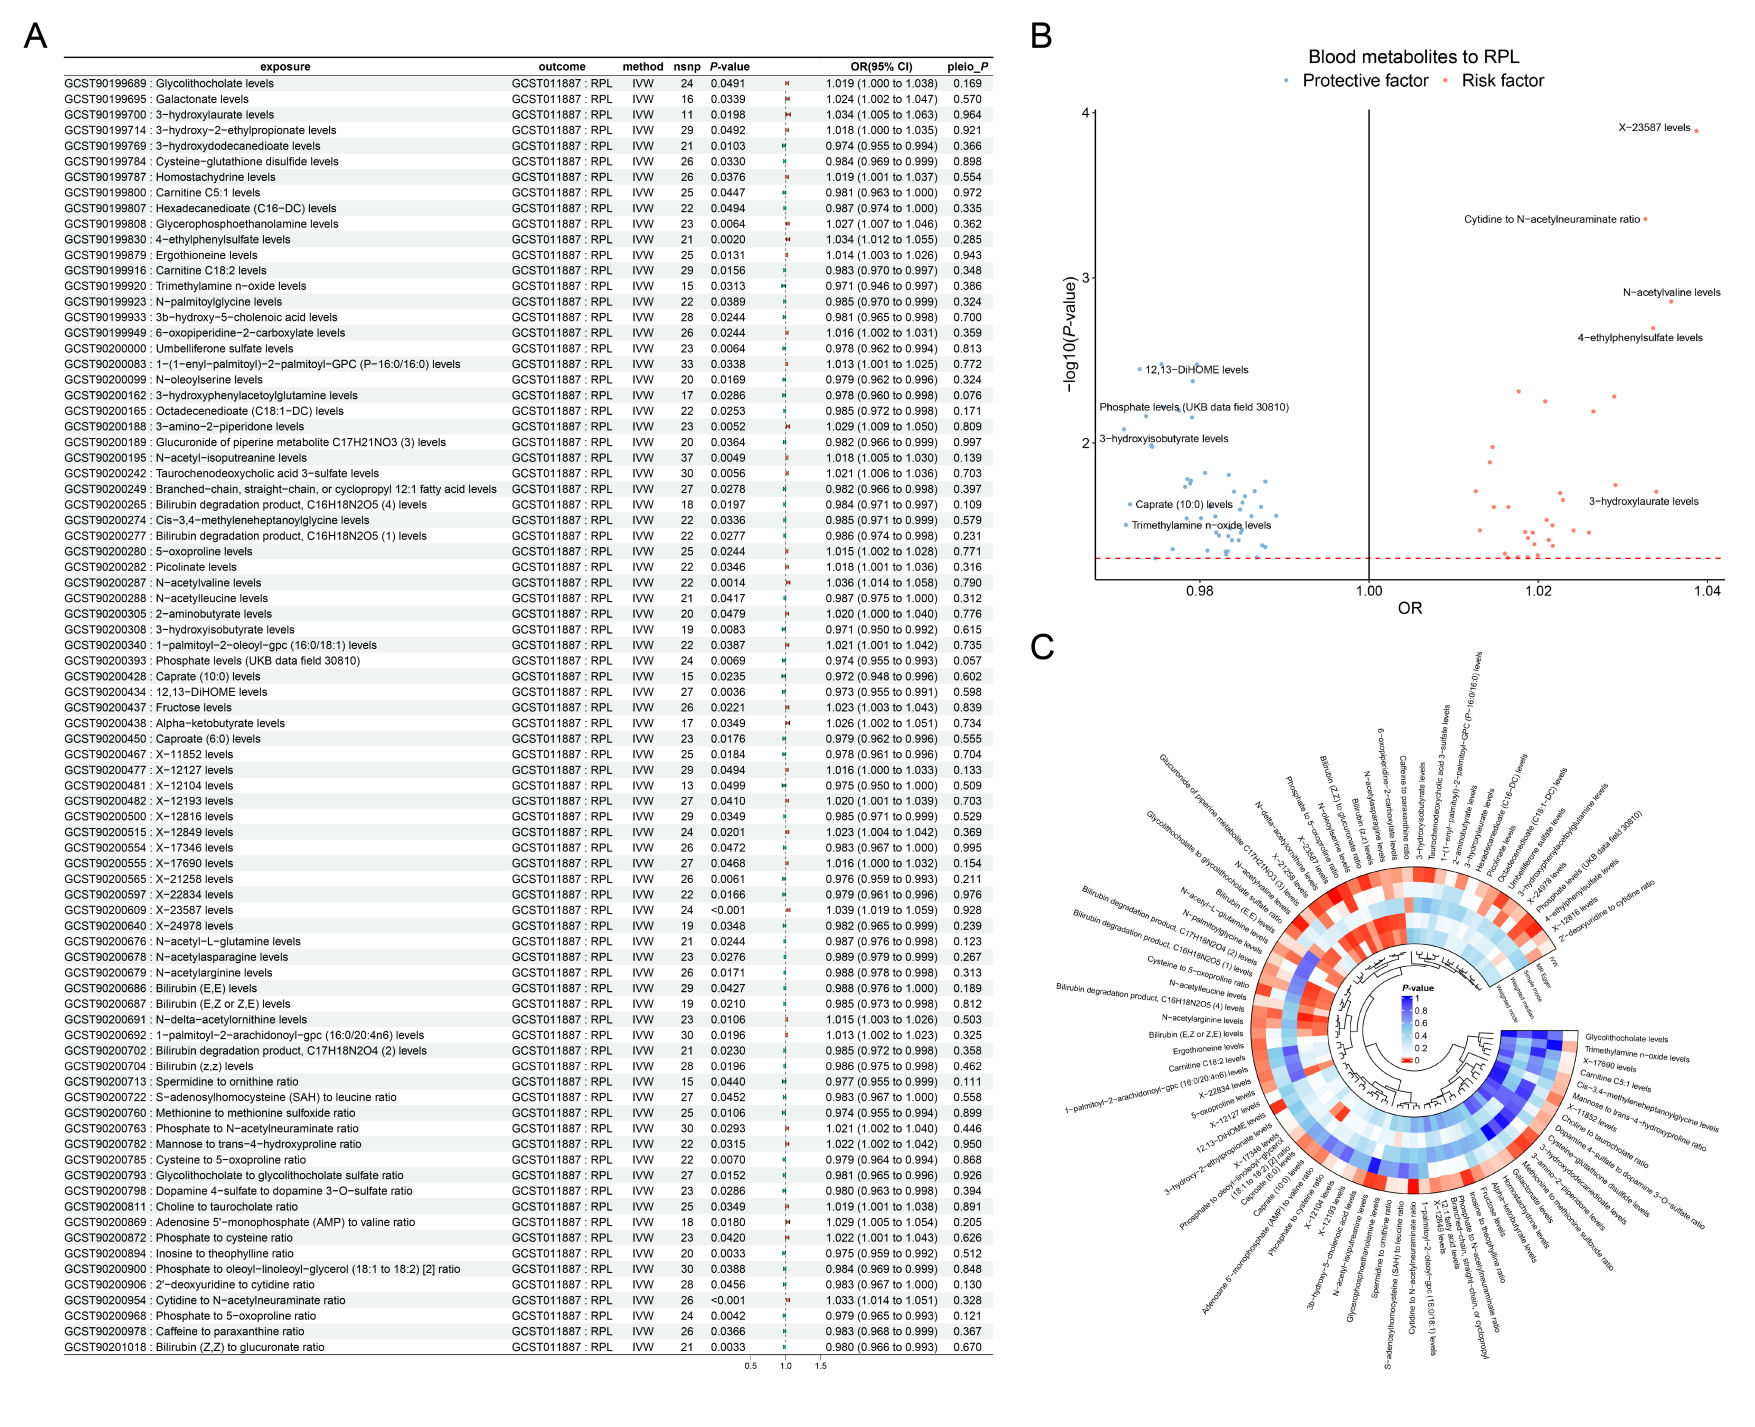


**Figure S2** Causal association of blood metabolites with RPL. (**A**) The forest diagram; (**B**) The volcano diagram; (**C**) The heat map.


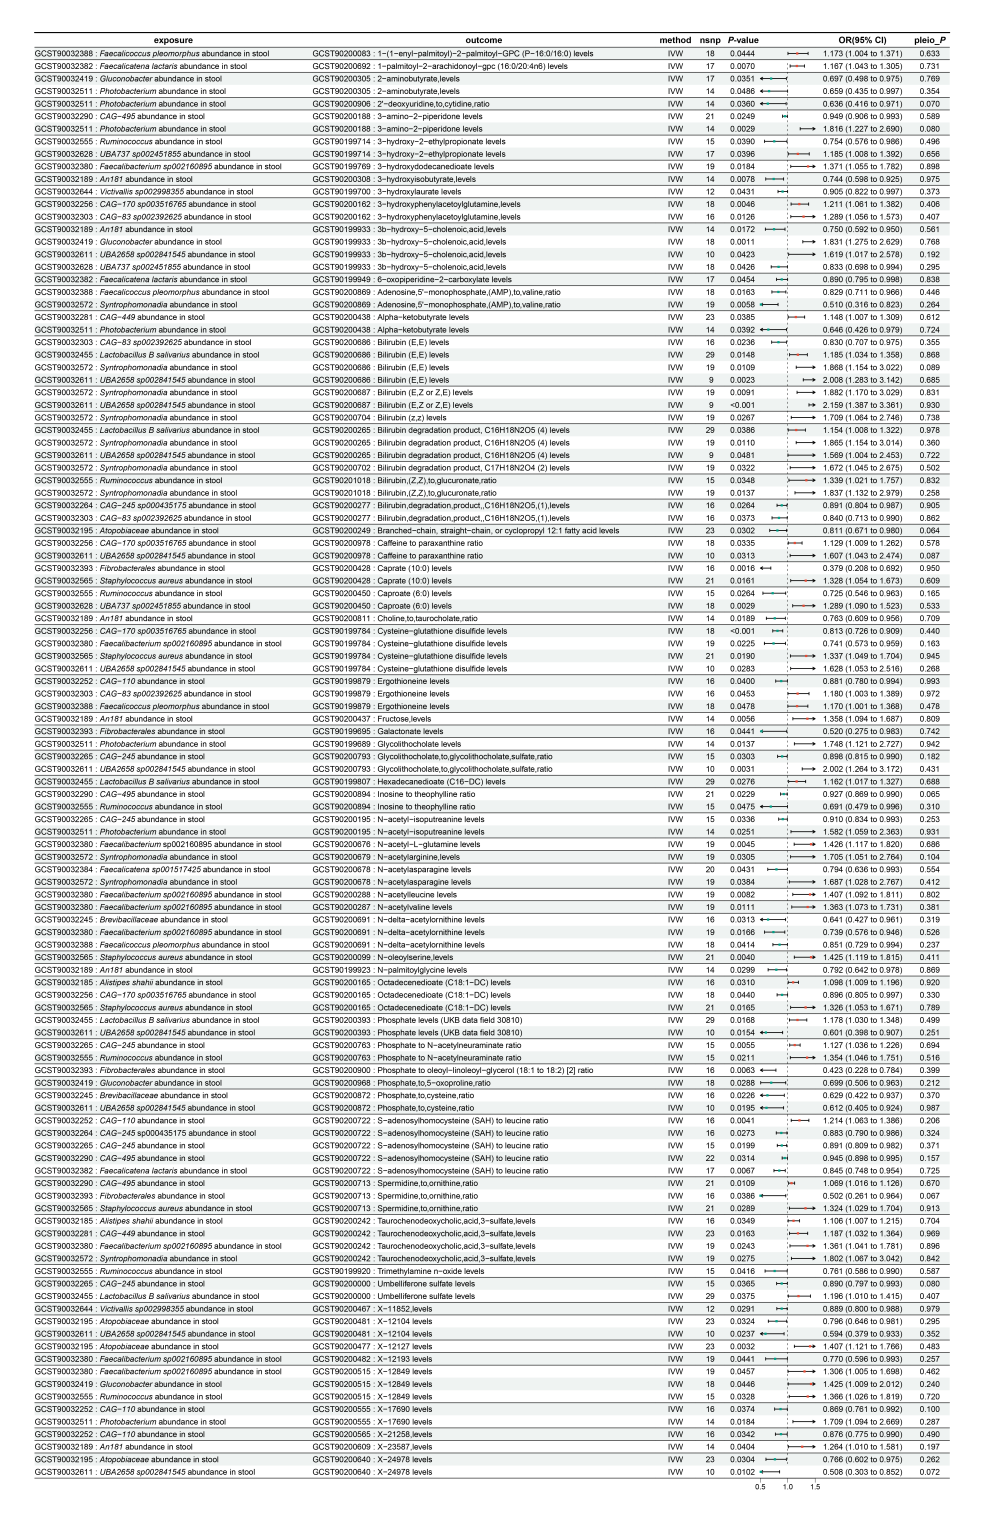


**Figure S3** The casual relationships between gut microbiota and blood metabolites.


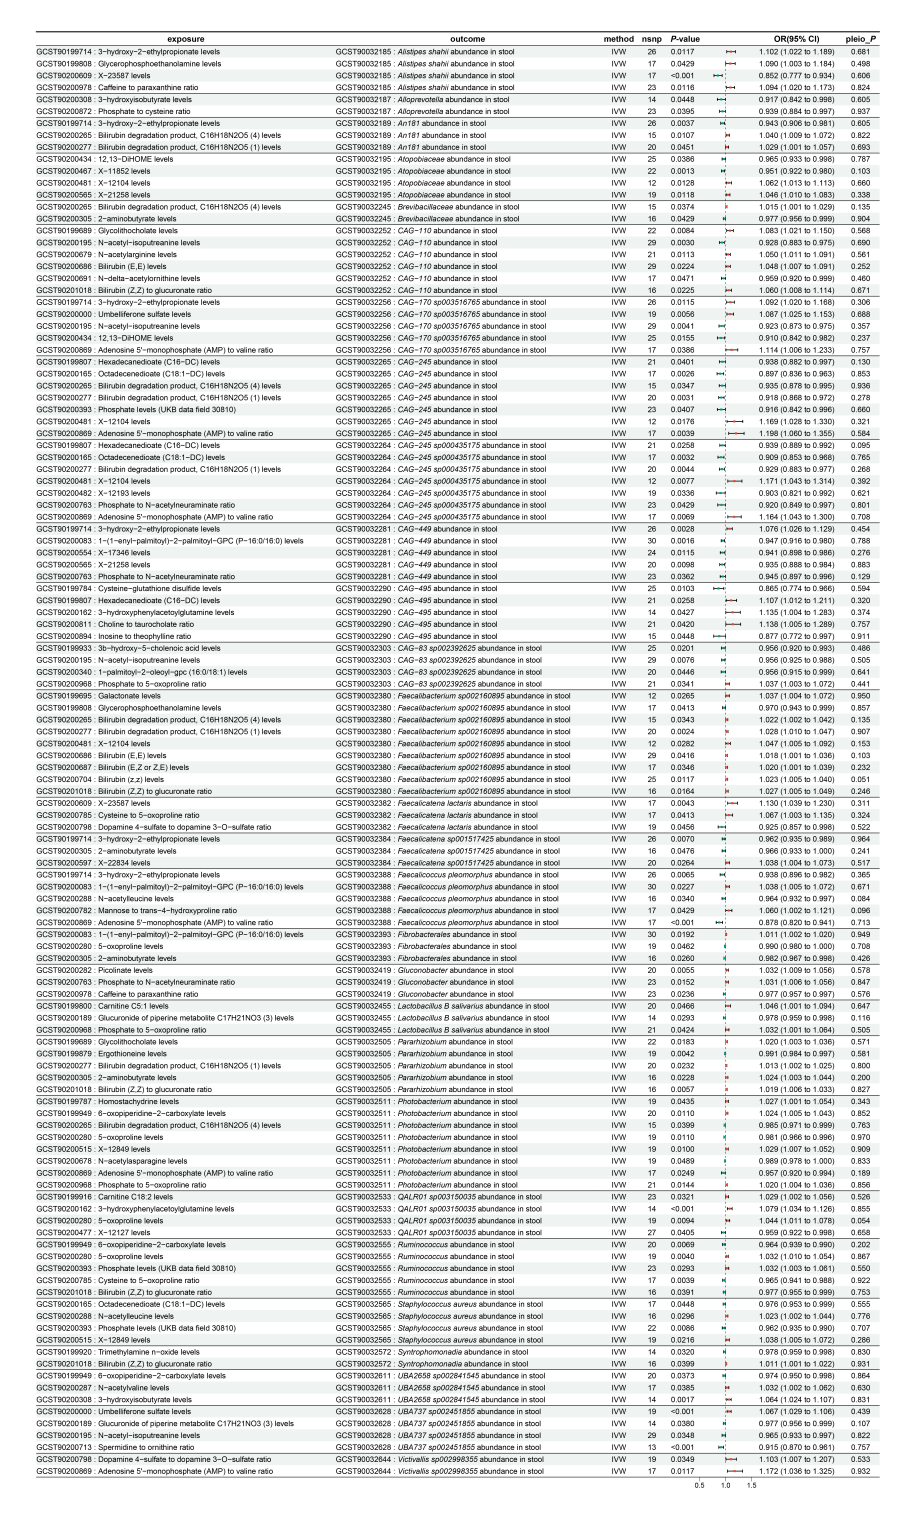


**Figure S4** The casual relationships between blood metabolites and gut microbiota.


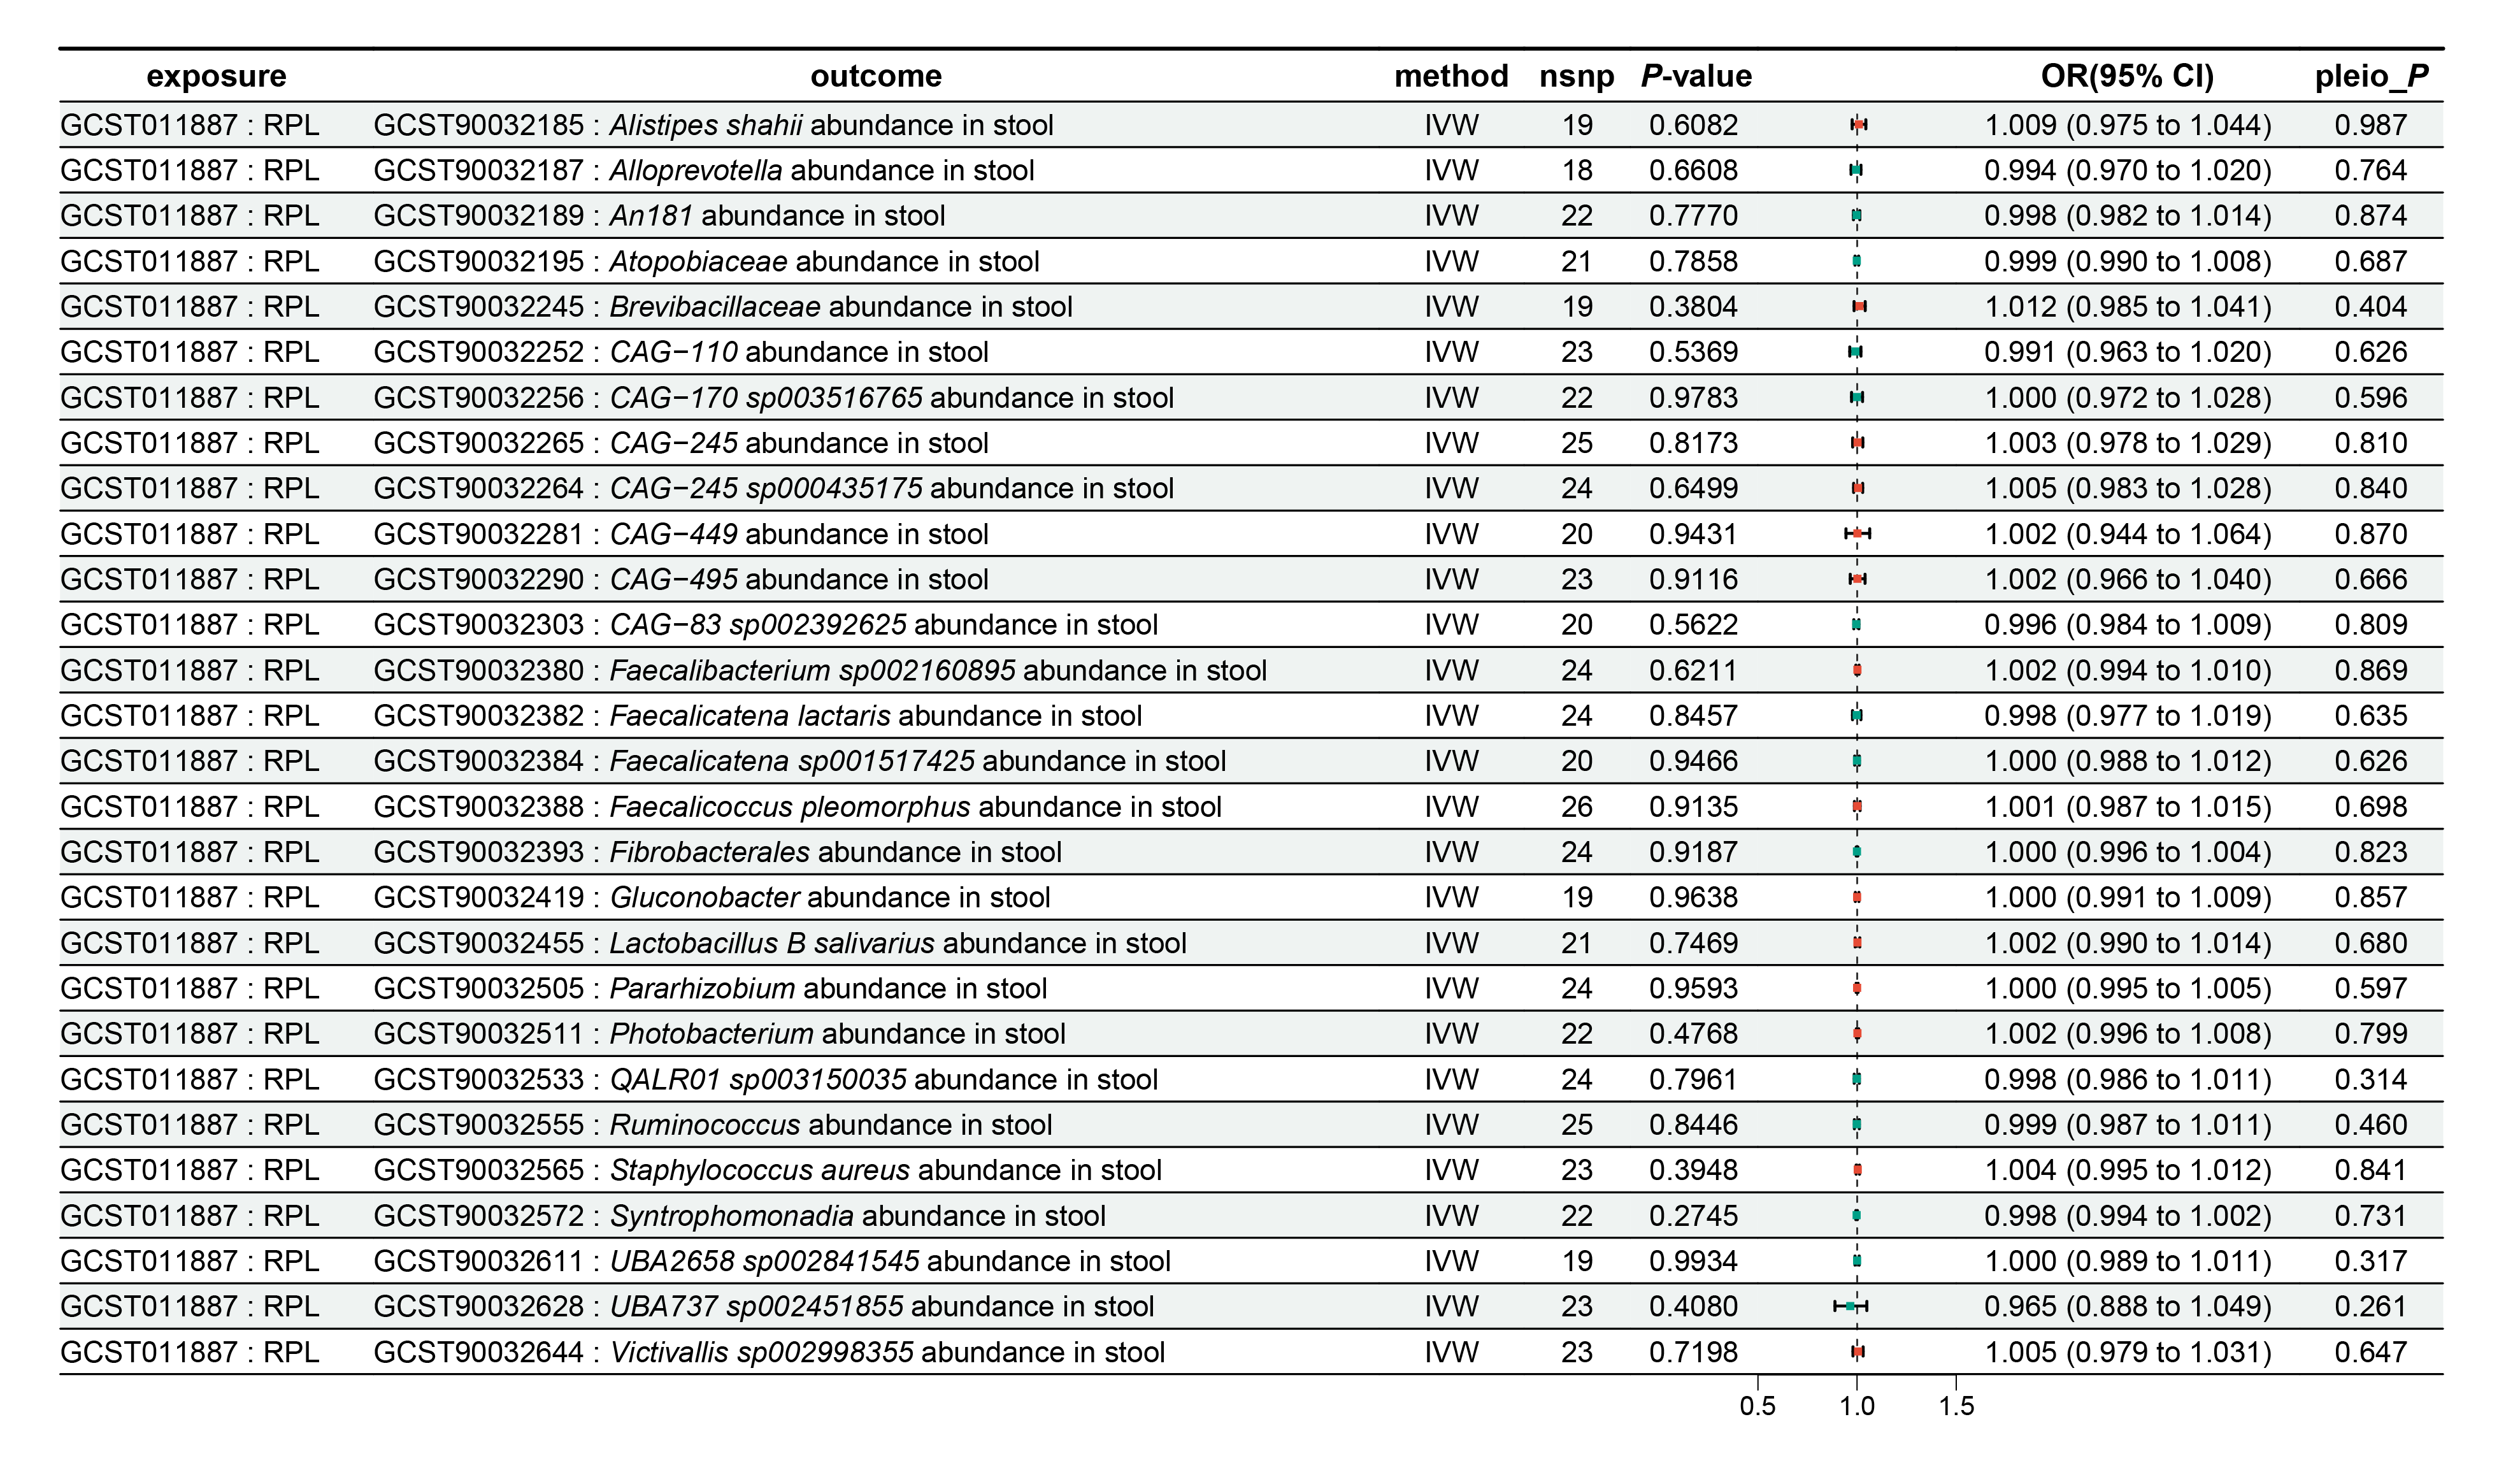


**Figure S5** The reverse Mendelian randomization (MR) analysis of RPL and gut microbiota.


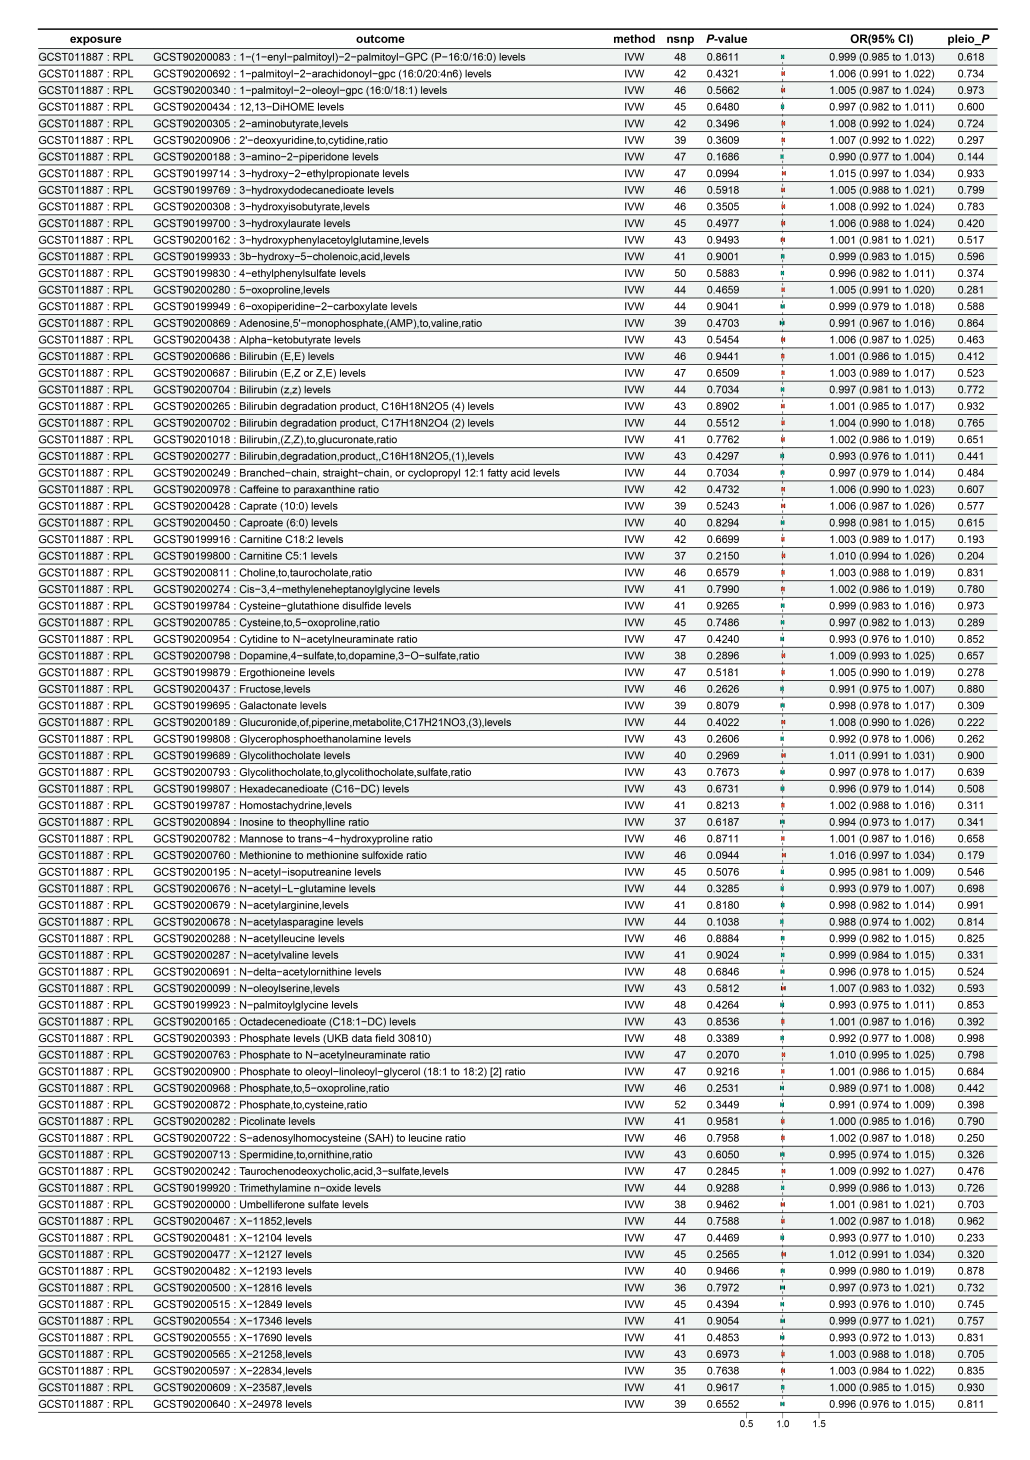


**Figure S6** The reverse MR analysis of RPL and blood metabolites.


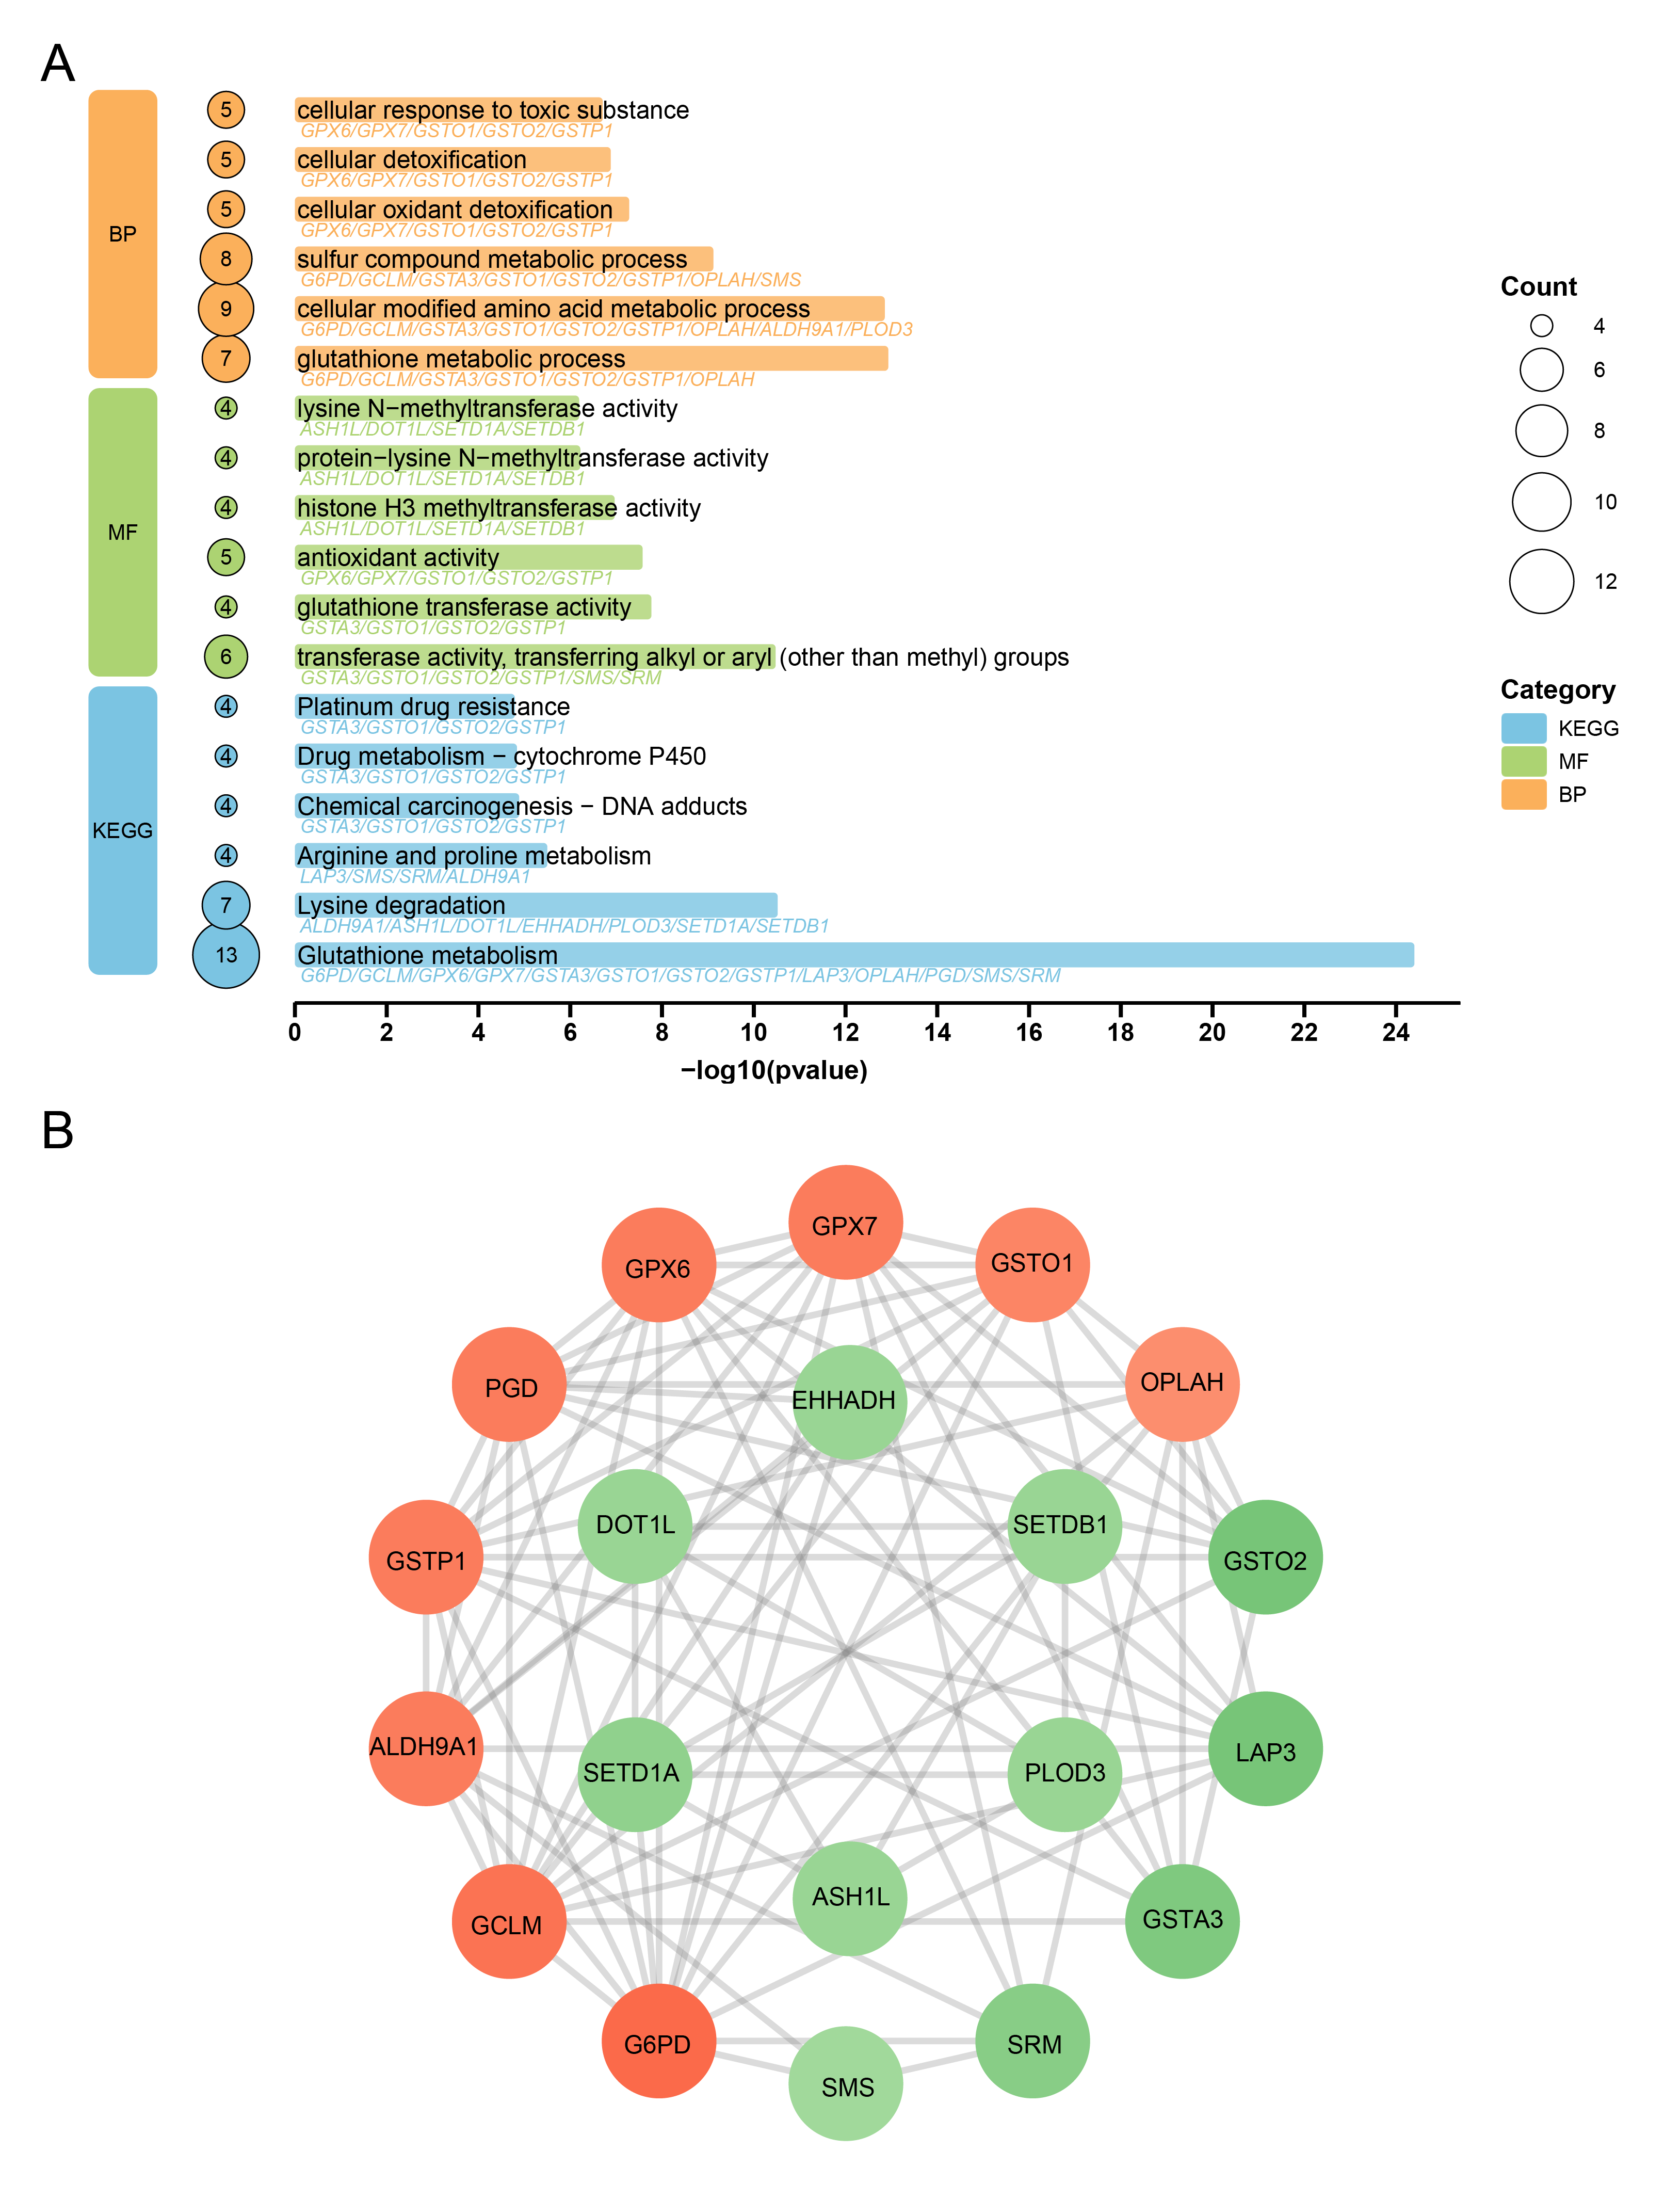


**Figure S7** Transcriptomic analysis revealed key genes in RPL. (**A**) Functional enrichment analysis of key genes. (**B**) Protein-protein interaction (PPI) network of the key genes. **Abbreviations:** BP, Biological Process; CC, Cellular Component; MF, Molecular Function.


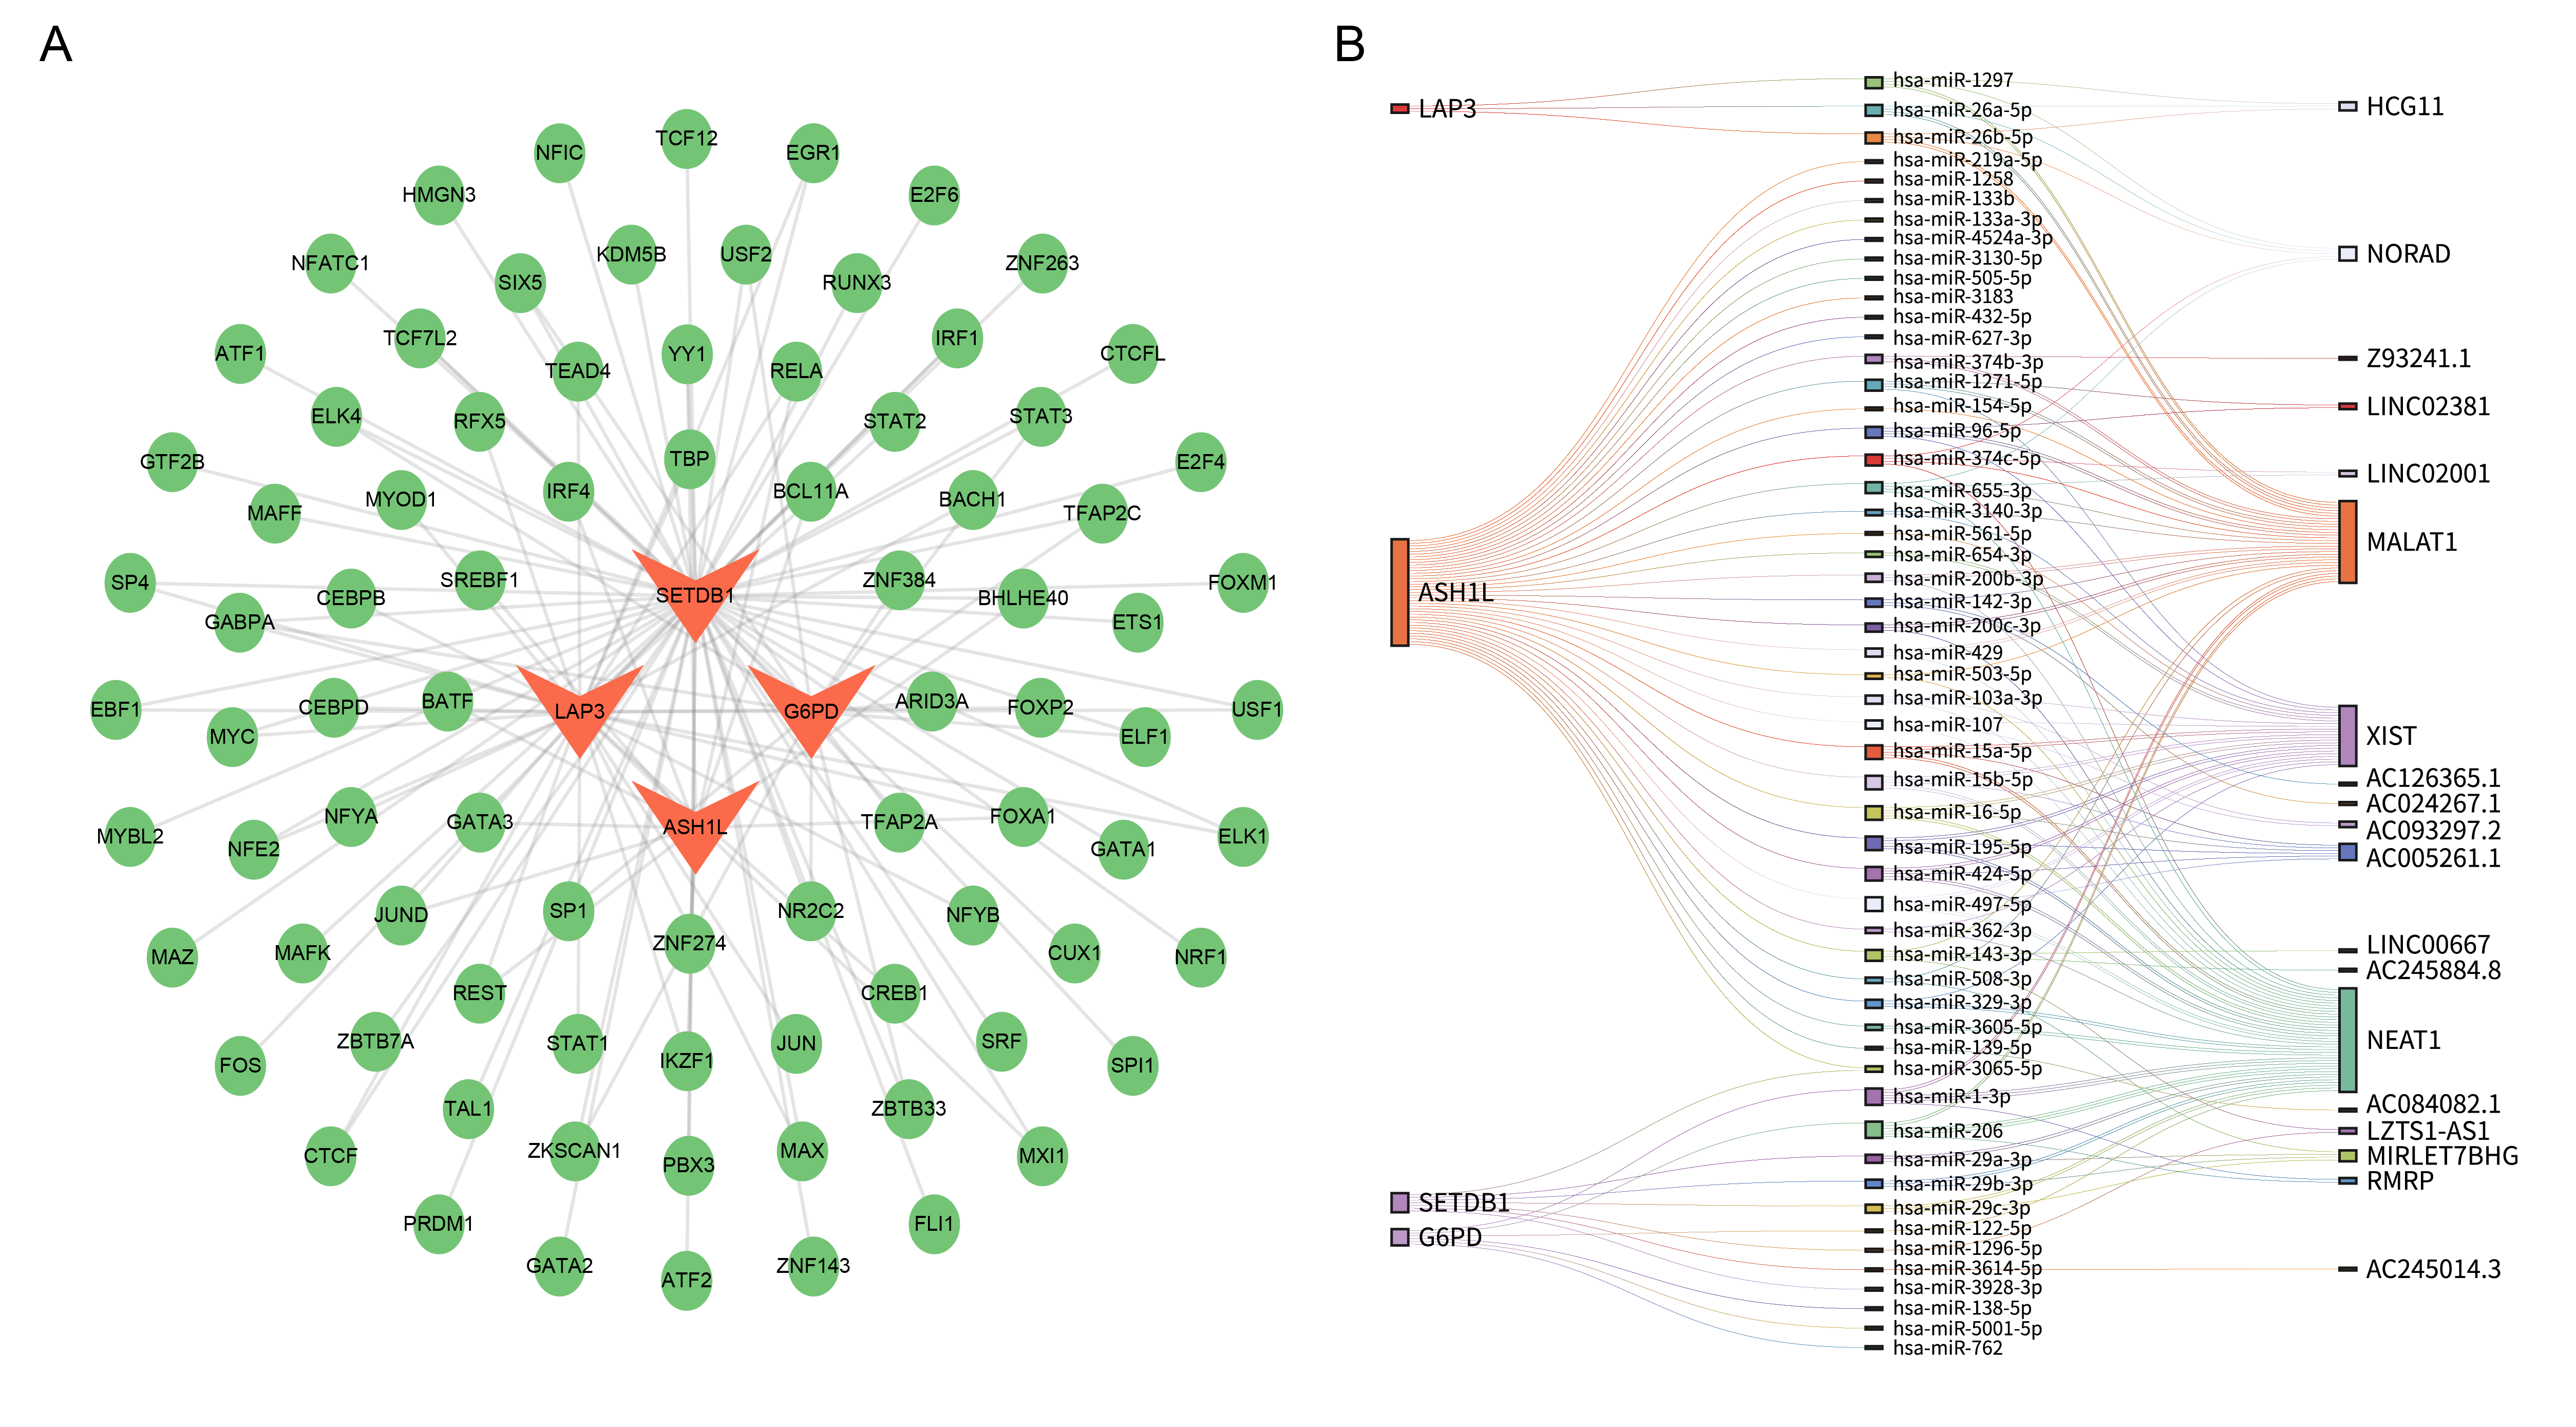


**Figure S8** Regulatory networks of the biomarkers. (**A**) Biomarker-transcription factor (TF) regulatory network. Red represents biomarkers and green represents TFs. (**B**) Biomarker-microRNA (miRNA)-long non-coding RNA (lncRNA) regulatory network.


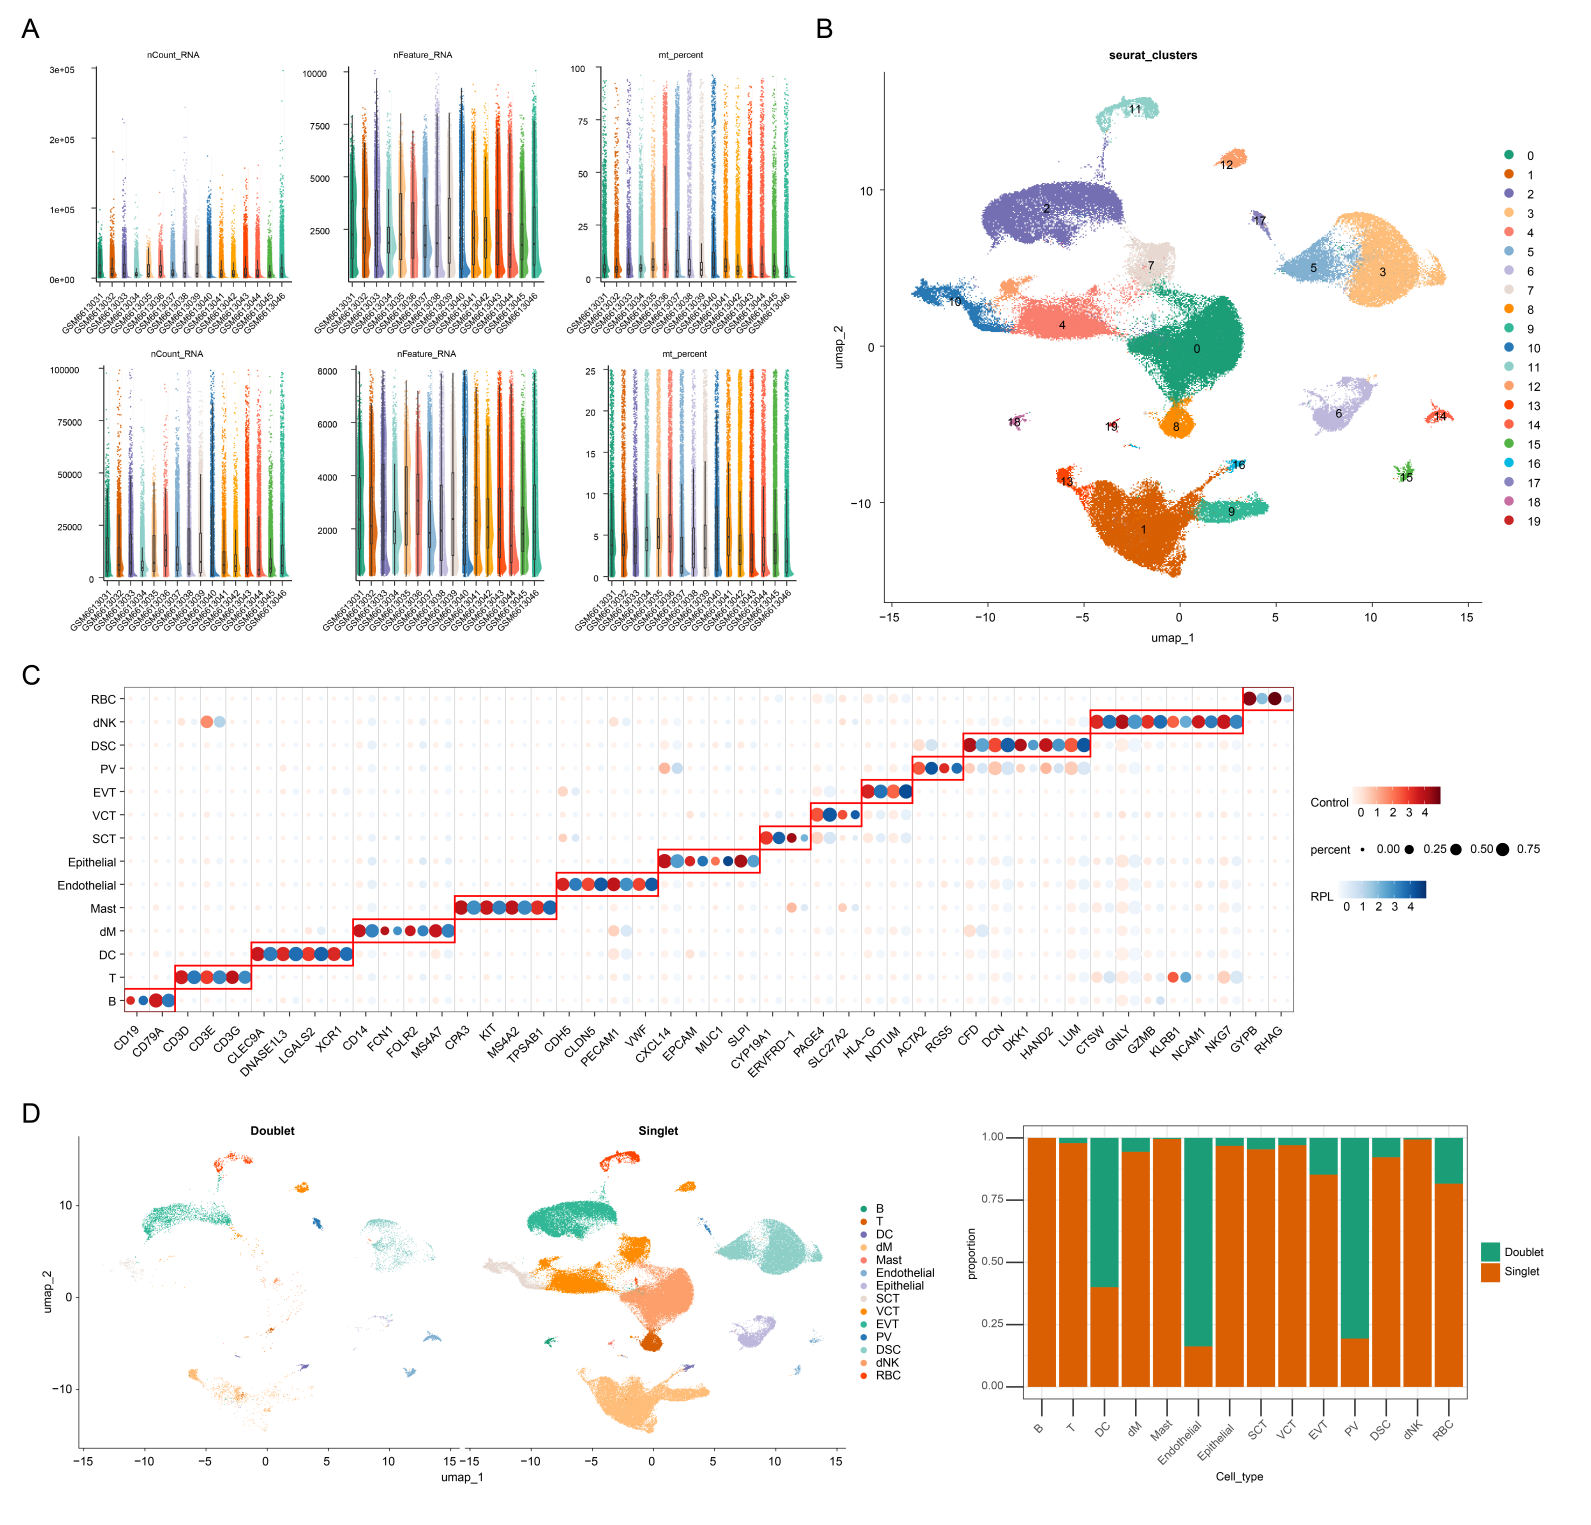


**Figure S9** Single-cell RNA sequencing (scRNA-seq) and cell type identification. (**A**) Quality control metrics of the scRNA-seq data. (**B**) Uniform manifold approximation and projection (UMAP) plot showing 20 cell clusters. (**C**) UMAP plot annotated with 14 distinct cell types. (**D**) UMAP plot after doublet removal and proportions of doublets.

**Supplementary Tables**

**Table S1**STROBE-MR checklist of recommended items to address in reports of Mendelian randomization studies1 2

| **Item No.** | **Section** | **Checklist item** | **Page No.** | **Relevant text from manuscript** |
| --- | --- | --- | --- | --- |
| 1 | **TITLE and ABSTRACT** | Indicate Mendelian randomization (MR) as the study’s design in the title and/or the abstract if that is a main purpose of the study | 2 | The causal associations of gut microbiota and blood metabolites with RPL, and biomarkers linking gut microbiota-blood metabolites network in RPL were explored through integrative multi-omics analysis including mediation Mendelian randomization (MR) analysis, differential expression and enrichment analyses, machine learning, and gene set enrichment analysis (GSEA). |
|  | **INTRODUCTION** |  |  |  |
| 2 | **Background** | Explain the scientific background and rationale for the reported study. What is the exposure? Is a potential causal relationship between exposure and outcome plausible? Justify why MR is a helpful method to address the study question | 4 | However, conducting clinical trials to address these questions is rather difficult due to the constraints of sample size and the interference of many confounders. By contrast, Mendelian Randomization (MR) has emerged as a powerful research methodology for assessing the causal associations between exposures and specific diseases since it can minimize the interference of confounders and the bias caused by reverse causality while providing reliable and robust estimations. |
| 3 | **Objectives** | State specific objectives clearly, including pre-specified causal hypotheses (if any). State that MR is a method that, under specific assumptions, intends to estimate causal effects | 4 | Herein, we explored causal associations of gut microbiota and blood metabolites with RPL, and the potential interaction/mediating relationship between them through bidirectional two-sample MR study and mediation analysis. |
|  | **METHODS** |  |  |  |
| 4 | **Study design and data sources** | Present key elements of the study design early in the article. Consider including a table listing sources of data for all phases of the study. For each data source contributing to the analysis, describe the following: |  |  |
|  | a) | Setting: Describe the study design and the underlying population, if possible. Describe the setting, locations, and relevant dates, including periods of recruitment, exposure, follow-up, and data collection, when available. | 6 | Data regarding gut microbiota, blood metabolites, and RPL were obtained from the NHGRI-EBI GWAS Catalog database (https://www.ebi.ac.uk/gwas/). The human gut microbiota data (GCST90032172-GCST90032644) used in this study were derived from the largest GWAS published to date, which were based on fecal samples from 5,959 Finnish individuals, involving 7,967,866 single nucleotide polymorphisms (SNPs) and covering 473 taxonomic units, including 11 phyla, 19 classes, 24 orders, 62 families, 146 genera, and 209 species. The metabolite data utilized in this analysis were from one of the most comprehensive metabolite studies, which encompassed 1,091 blood metabolites and 309 metabolite ratios, deriving from the analysis of 8,299 European participants in the Canadian Longitudinal Study on Aging cohort and involving approximately 15.4 million SNPs.18 The full GWAS summary statistics for these 1,400 blood biomarkers were accessible to the public in the GWAS Catalog (GCST90199621-GCST90201020). |
|  | b) | Participants: Give the eligibility criteria, and the sources and methods of selection of participants. Report the sample size, and whether any power or sample size calculations were carried out prior to the main analysis | 6 | Data regarding gut microbiota, blood metabolites, and RPL were obtained from the NHGRI-EBI GWAS Catalog database (https://www.ebi.ac.uk/gwas/). The human gut microbiota data (GCST90032172-GCST90032644) used in this study were derived from the largest GWAS published to date, which were based on fecal samples from 5,959 Finnish individuals, involving 7,967,866 single nucleotide polymorphisms (SNPs) and covering 473 taxonomic units, including 11 phyla, 19 classes, 24 orders, 62 families, 146 genera, and 209 species. The metabolite data utilized in this analysis were from one of the most comprehensive metabolite studies, which encompassed 1,091 blood metabolites and 309 metabolite ratios, deriving from the analysis of 8,299 European participants in the Canadian Longitudinal Study on Aging cohort and involving approximately 15.4 million SNPs.18 The full GWAS summary statistics for these 1,400 blood biomarkers were accessible to the public in the GWAS Catalog (GCST90199621-GCST90201020). The RPL dataset was identified as GCST011887 and consisted of 150,965 samples, including 750 RPL cases and 150,215 control samples, all of which were of European descent and encompassed 23,125,249 SNPs. |
|  | c) | Describe measurement, quality control and selection of genetic variants | 6 | To fulfill the three assumptions of MR analysis (Figure 1), SNPs used as IVs need to adhere to the following criteria: Firstly, a relatively lenient statistical threshold of *P* < 1×10-5 was employed to recognize SNPs associated with 473 gut microbiota and 1,400 blood metabolites, thereby capturing a broader range of genetic variations. For RPL, a threshold of *P* < 5×10-6 was utilized. Secondly, to avoid biased results caused by LD in this study, the “ieugwasr” package (v 1.0.0) was utilized to remove inapplicable IVs with LD, with a threshold of r² < 0.001 and a clustering distance of 10,000 kb. Thirdly, the F-statistic was applied to measure the strength of the IVs, those IVs exhibiting an F-statistic below 10 were deemed weak instruments and thus removed using the formula F = (N-k-1)/k × [R2/(1-R2)], where N represents the sample size of the exposure GWAS, k is the number of IVs, and R2 is the proportion of variance explained.20 Fourthly, the IVs strongly associated with the outcome GWAS traits (*P* < 1×10-5) were excluded to minimize potential confounding factors (Figure 2). Subsequently, to ensure the unidirectionality of causalities, the Steiger directionality test was used to further screen IVs. Finally, the SNPs containing palindromic sequences were eliminated after matching the results to ensure the effects of SNPs on the exposure consistent with the same allele as those on the outcome. |
|  | d) | For each exposure, outcome, and other relevant variables, describe methods of assessment and diagnostic criteria for diseases | 7 | To explore the impact of gut microbiota and blood metabolites on RPL, the TwoSampleMR package (v 0.6.0) and MRPRESSO package (v 1.0) were utilized. |
|  | e) | Provide details of ethics committee approval and participant informed consent, if relevant | NA | NA |
| 5 | **Assumptions** | Explicitly state the three core IV assumptions for the main analysis (relevance, independence and exclusion restriction) as well assumptions for any additional or sensitivity analysis | 5 | First and foremost, to eliminate bias and guarantee the reliability of causal inference, the genetic variants that were utilized as IVs in the MR study must comply with three fundamental assumptions: (1) there should be a significant association between genetic variants and the exposures under investigation; (2) there is no association between genetic variants and confounders of the exposures and outcomes; (3) the effect of genetic variants on the outcomes should be fully mediated by the exposures (Figure 1). |
| 6 | **Statistical methods: main analysis** | Describe statistical methods and statistics used |  |  |
|  | a) | Describe how quantitative variables were handled in the analyses (i.e., scale, units, model) | NA | NA |
|  | b) | Describe how genetic variants were handled in the analyses and, if applicable, how their weights were selected | 6 | To fulfill the three assumptions of MR analysis (Figure 1), SNPs used as IVs need to adhere to the following criteria: Firstly, a relatively lenient statistical threshold of *P* < 1×10-5 was employed to recognize SNPs associated with 473 gut microbiota and 1,400 blood metabolites, thereby capturing a broader range of genetic variations. For RPL, a threshold of *P* < 5×10-6 was utilized. Secondly, to avoid biased results caused by LD in this study, the “ieugwasr” package (v 1.0.0) was utilized to remove inapplicable IVs with LD, with a threshold of r² < 0.001 and a clustering distance of 10,000 kb. Thirdly, the F-statistic was applied to measure the strength of the IVs, those IVs exhibiting an F-statistic below 10 were deemed weak instruments and thus removed using the formula F = (N-k-1)/k × [R2/(1-R2)], where N represents the sample size of the exposure GWAS, k is the number of IVs, and R2 is the proportion of variance explained.20 Fourthly, the IVs strongly associated with the outcome GWAS traits (*P* < 1×10-5) were excluded to minimize potential confounding factors (Figure 2). Subsequently, to ensure the unidirectionality of causalities, the Steiger directionality test was used to further screen IVs. Finally, the SNPs containing palindromic sequences were eliminated after matching the results to ensure the effects of SNPs on the exposure consistent with the same allele as those on the outcome. |
|  | c) | Describe the MR estimator (e.g. two-stage least squares, Wald ratio) and related statistics. Detail the included covariates and, in case of two-sample MR, whether the same covariate set was used for adjustment in the two samples | 7 | The inverse variance weighted (IVW) method was selected as the primary method for MR analysis as it could integrate information from all IVs to estimate the causal effect through a weighted average. On this basis, to further affirm the robustness of the MR analysis, weighted median, MR Egger, weighted mode, and simple mode were implemented to assess the potential causal effects. Moreover, reverse MR analysis was also conducted, in which RPL served as the exposure while gut microbiota or blood metabolites as the outcome, to assess whether RPL exerted a causal effect on gut microbiota or blood metabolites. |
|  | d) | Explain how missing data were addressed | NA | NA |
|  | e) | If applicable, indicate how multiple testing was addressed |  |  |
| 7 | **Assessment of assumptions** | Describe any methods or prior knowledge used to assess the assumptions or justify their validity | 7 | Moreover, reverse MR analysis was also conducted, in which RPL served as the exposure while gut microbiota or blood metabolites as the outcome, to assess whether RPL exerted a causal effect on gut microbiota or blood metabolites. |
| 8 | **Sensitivity analyses and additional analyses** | Describe any sensitivity analyses or additional analyses performed (e.g. comparison of effect estimates from different approaches, independent replication, bias analytic techniques, validation of instruments, simulations) | 11 | To confirm the robustness of the causal effects, sensitivity test was executed, including heterogeneity test, horizontal pleiotropy test, and leave-one-out (LOO) test. The mr_heterogeneity function was used to inspect the level of heterogeneity. When heterogeneity was present (*P* < 0.05), the IVW-random effects model was selected; otherwise, the IVW-fixed effects model was implemented. To gauge potential horizontal pleiotropy of the results, MR-Egger regression intercept tests and MR-PRESSO global tests were conducted. Any result demonstrating substantial pleiotropy (*P* < 0.05) was omitted from further analysis. |
| 9 | **Software and pre-registration** |  |  |  |
|  | a) | Name statistical software and package(s), including version and settings used | 7 | To explore the impact of gut microbiota and blood metabolites on RPL, the TwoSampleMR package (v 0.6.0) and MRPRESSO package (v 1.0) were utilized. |
|  | b) | State whether the study protocol and details were pre-registered (as well as when and where) | NA | NA |
|  | **RESULTS** |  |  |  |
| 10 | **Descriptive data** |  |  |  |
|  | a) | Report the numbers of individuals at each stage of included studies and reasons for exclusion. Consider use of a flow diagram | NA | NA |
|  | b) | Report summary statistics for phenotypic exposure(s), outcome(s), and other relevant variables (e.g. means, SDs, proportions) | 12 | Of 473 gut microbiota, 28 gut microbiota were found to be significantly associated with RPL. Among them, the abundances of *Brevibacillaceae, Faecalicatena sp001517425, Photobacterium, Staphylococcus aureus,* *Syntrophomonadia,* *Alloprevotella,* etc were connected with an increasing risk of RPL [odds ratio (OR) > 1.000, *P* < 0.05]. The others such as *Fibrobacterales, Gluconobacter, Pararhizobium, Ruminococcus, CAG-495,* and *UBA2658 sp002841545* were identified as protective factors for RPL (OR < 1.000, *P* < 0.05) (Figure S1). |
|  | c) | If the data sources include meta-analyses of previous studies, provide the assessments of heterogeneity across these studies | NA | NA |
|  | d) | For two-sample MR:  i.  Provide justification of the similarity of the genetic variant-exposure associations between the exposure and outcome samples  ii.  Provide information on the number of individuals who overlap between the exposure and outcome studies | NA | NA |
| 11 | **Main results** |  |  |  |
|  | a) | Report the associations between genetic variant and exposure, and between genetic variant and outcome, preferably on an interpretable scale | 12 | Among them, 37 blood metabolites and 12 metabolite ratios were identified as protective factors for RPL, such as levels of trimethylamine n-oxide, 3-hydroxyisobutyrate, phosphate, caprate (10:0), 12,13-DiHOME, and cysteine-glutathione disulfide (OR < 1.000, *P* < 0.05); while 27 blood metabolites and 6 metabolite ratios were recognized as risk factors for RPL, such as levels of 3-hydroxylaurate, 4-ethylphenylsulfate, 3-amino-2-piperidone, N-acetylvaline, X-23587, and cytidine to N-acetylneuraminate ratio (OR > 1.000, *P* < 0.05) (Figure S2). |
|  | b) | Report MR estimates of the relationship between exposure and outcome, and the measures of uncertainty from the MR analysis, on an interpretable scale, such as odds ratio or relative risk per SD difference | 12 | Of 473 gut microbiota, 28 gut microbiota were found to be significantly associated with RPL. Among them, the abundances of *Brevibacillaceae, Faecalicatena sp001517425, Photobacterium, Staphylococcus aureus,* *Syntrophomonadia,* *Alloprevotella,* etc were connected with an increasing risk of RPL [odds ratio (OR) > 1.000, *P* < 0.05]. The others such as *Fibrobacterales, Gluconobacter, Pararhizobium, Ruminococcus, CAG-495,* and *UBA2658 sp002841545* were identified as protective factors for RPL (OR < 1.000, *P* < 0.05) (Figure S1). |
|  | c) | If relevant, consider translating estimates of relative risk into absolute risk for a meaningful time period | NA | NA |
|  | d) | Consider plots to visualize results (e.g. forest plot, scatterplot of associations between genetic variants and outcome versus between genetic variants and exposure) | 13 | Table 1, Table 2, and Figure 3 |
| 12 | **Assessment of assumptions** |  |  |  |
|  | a) | Report the assessment of the validity of the assumptions | 12 | No heterogeneity or horizontal pleiotropy was observed in the findings (Table S2). |
|  | b) | Report any additional statistics (e.g., assessments of heterogeneity across genetic variants, such as *I2*, Q statistic or E-value) | 12 | No heterogeneity or horizontal pleiotropy was observed in the findings (Table S2). |
| 13 | **Sensitivity analyses and additional analyses** |  |  |  |
|  | a) | Report any sensitivity analyses to assess the robustness of the main results to violations of the assumptions | 12 | No heterogeneity or horizontal pleiotropy was observed in the findings (Table S2). |
|  | b) | Report results from other sensitivity analyses or additional analyses | NA | NA |
|  | c) | Report any assessment of direction of causal relationship (e.g., bidirectional MR) | 13 | Reverse MR analysis was implemented to study the potential reverse causal links between RPL and gut microbiota as well as blood metabolites. The analysis displayed that there was no reverse causal relationship between them (Figure S5-S6). |
|  | d) | When relevant, report and compare with estimates from non-MR analyses | NA | NA |
|  | e) | Consider additional plots to visualize results (e.g., leave-one-out analyses) | NA | NA |
|  | **DISCUSSION** |  |  |  |
| 14 | **Key results** | Summarize key results with reference to study objectives | 17 | Here, from the perspectives of the microbiota and metabolome, our MR analysis established causal gut microbiota-blood metabolites in RPL and further identified four biomarkers (ASH1L, G6PD, SETDB1, and LAP3) at the transcriptomic level, providing an entero-metabolic axis perspective for understanding the etiology of RPL. |
| 15 | **Limitations** | Discuss limitations of the study, taking into account the validity of the IV assumptions, other sources of potential bias, and imprecision. Discuss both direction and magnitude of any potential bias and any efforts to address them | 22 | Firstly, although we utilized the largest GWAS datasets that currently available, all data were from individuals of European ancestry. Although this reduced heterogeneity, it restricted the generalizability of our findings to other populations. Further validation in diverse groups is needed to confirm their broader generalizability. Secondly, due to the limited number of SNPs reaching genome-wide significance, we adopted a relatively lenient *P*-value threshold. Although this approach is well-established in similar studies and was supplemented multiple validation methods to ensure the reliability, further large-scale randomized controlled trials are still warranted to enhance the validity of the findings. Thirdly, as with all MR investigations, our study cannot completely exclude horizontal pleiotropy or weak instrument bias, which may affect the stability of causal estimates. Additionally, the nomogram had potential overfitting risk due to the small control sample size in the training set. The scarcity of public RPL datasets limits further sample expansion and external validation, requiring cautious interpretation and future large-scale independent validation. Finally, the specific mechanisms of the obtained biomarkers also need to be functionally verified through *in vivo* and *in vitro* experiments. |
| 16 | **Interpretation** |  |  |  |
|  | a) | Meaning: Give a cautious overall interpretation of results in the context of their limitations and in comparison with other studies | 22 | Secondly, due to the limited number of SNPs reaching genome-wide significance, we adopted a relatively lenient P-value threshold. Although this approach is well-established in similar studies and was supplemented multiple validation methods to ensure the reliability, further large-scale randomized controlled trials are still warranted to enhance the validity of the findings. |
|  | b) | Mechanism: Discuss underlying biological mechanisms that could drive a potential causal relationship between the investigated exposure and the outcome, and whether the gene-environment equivalence assumption is reasonable. Use causal language carefully, clarifying that IV estimates may provide causal effects only under certain assumptions | 18 | Therefore, our mediation analysis surprisingly found that *Photobacterium* increased the risk of RPL through the mediation of 3-amino-2-piperidone (mediation proportion = 14.4%, β = 0.017, *P* = 0.0478). *Photobacterium* is a Gram-negative facultative anaerobic coccobacillus that widely distributed in marine habitats and can infect marine humans through the consumption of fish, causing various primary diseases. 3-amino-2-piperidone, an ornithine cycle-related metabolite which is probably involved in lysine metabolic pathways, has been found to promote the release of inflammatory factors. Based on data from European populations, particularly fish-consuming Finns, we speculate that *Photobacterium* may enter the human body through diet and influence RPL by mediating immune regulation via this metabolite. |
|  | c) | Clinical relevance: Discuss whether the results have clinical or public policy relevance, and to what extent they inform effect sizes of possible interventions | NA | NA |
| 17 | **Generalizability** | Discuss the generalizability of the study results (a) to other populations, (b) across other exposure periods/timings, and (c) across other levels of exposure | 22 | Firstly, although we utilized the largest GWAS datasets that currently available, all data were from individuals of European ancestry. Although this reduced heterogeneity, it restricted the generalizability of our findings to other populations. Further validation in diverse groups is needed to confirm their broader generalizability. Secondly, due to the limited number of SNPs reaching genome-wide significance, we adopted a relatively lenient *P*-value threshold. Although this approach is well-established in similar studies and was supplemented multiple validation methods to ensure the reliability, further large-scale randomized controlled trials are still warranted to enhance the validity of the findings. Thirdly, as with all MR investigations, our study cannot completely exclude horizontal pleiotropy or weak instrument bias, which may affect the stability of causal estimates. Additionally, the nomogram had potential overfitting risk due to the small control sample size in the training set. The scarcity of public RPL datasets limits further sample expansion and external validation, requiring cautious interpretation and future large-scale independent validation. Finally, the specific mechanisms of the obtained biomarkers also need to be functionally verified through *in vivo* and *in vitro* experiments. |
|  | **OTHER INFORMATION** |  |  |  |
| 18 | **Funding** | Describe sources of funding and the role of funders in the present study and, if applicable, sources of funding for the databases and original study or studies on which the present study is based | 38 | This study received no external funding. |
| 19 | **Data and data sharing** | Provide the data used to perform all analyses or report where and how the data can be accessed, and reference these sources in the article. Provide the statistical code needed to reproduce the results in the article, or report whether the code is publicly accessible and if so, where | 23 | Data supporting the findings of this study are publicly available from the NHGRI-EBI GWAS Catalog database (https://www.ebi.ac.uk/gwas/) and GEO database (http://www.ncbi.nlm.nih.gov/geo/). The involved accession numbers are shown in the main text and supplementary tables. |
| 20 | **Conflicts of Interest** | All authors should declare all potential conflicts of interest | 40 | The authors declare no competing interest. |

This checklist is copyrighted by the Equator Network under the Creative Commons Attribution 3.0 Unported (CC BY 3.0) license.

1. Skrivankova VW, Richmond RC, Woolf BAR, Yarmolinsky J, Davies NM, Swanson SA, et al. Strengthening the Reporting of Observational Studies in Epidemiology using Mendelian Randomization (STROBE-MR) Statement. JAMA. 2021;under review.

2. Skrivankova VW, Richmond RC, Woolf BAR, Davies NM, Swanson SA, VanderWeele TJ, et al. Strengthening the Reporting of Observational Studies in Epidemiology using Mendelian Randomisation (STROBE-MR): Explanation and Elaboration. BMJ. 2021;375:n2233.

**Table S2** Results of heterogeneity and pleiotropy tests of the two-sample MR study with mediation analysis

| **id.exposure** | **exposure** | **id.outcome** | **outcome** | **method** | **n**  **snp** | ***P* value** | **or** | **or_lci95** | **or_uci95** | **pleio_*P*** | **heter_*P*** |
| --- | --- | --- | --- | --- | --- | --- | --- | --- | --- | --- | --- |
| GCST90032393 | Fibrobacterales abundance in stool | GCST011887 | RPL | IVW | 15 | 0.0312317828586033 | 0.853566034166986 | 0.739044323323071 | 0.985833936735431 | 0.42755434249088 | 0.195472041008978 |
| GCST90032505 | Pararhizobium abundance in stool | GCST011887 | RPL | IVW | 24 | 0.028062326898522 | 0.913506492966927 | 0.842659521987501 | 0.990309954279626 | 0.670420705401452 | 0.897147003346641 |
| GCST90032281 | CAG-449 abundance in stool | GCST011887 | RPL | IVW | 23 | 0.0118695735680939 | 0.962165104004528 | 0.933685884916508 | 0.991512994165942 | 0.303581431887841 | 0.408020841790773 |
| GCST90032290 | CAG-495 abundance in stool | GCST011887 | RPL | IVW | 23 | 0.00108065253835265 | 0.981936540244551 | 0.97126187949511 | 0.992728520930583 | 0.559124071734288 | 0.984502234428347 |
| GCST90032455 | Lactobacillus B salivarius abundance in stool | GCST011887 | RPL | IVW | 29 | 0.0178746448136523 | 0.961674431306881 | 0.931068364194092 | 0.993286580658243 | 0.776614423685828 | 0.098267803907375 |
| GCST90032388 | Faecalicoccus pleomorphus abundance in stool | GCST011887 | RPL | IVW | 17 | 0.0223328571036616 | 0.957919264192016 | 0.923232420115028 | 0.993909330649204 | 0.95600756747241 | 0.2543284866365 |
| GCST90032555 | Ruminococcus abundance in stool | GCST011887 | RPL | IVW | 14 | 0.0321114970604893 | 0.931619816694078 | 0.873181520643649 | 0.993969137387768 | 0.755892755083952 | 0.409772252021299 |
| GCST90032628 | UBA737 sp002451855 abundance in stool | GCST011887 | RPL | IVW | 18 | 0.0290645852397942 | 0.959845996997514 | 0.925163351284964 | 0.995828830306072 | 0.888055540325261 | 0.996401227621177 |
| GCST90032380 | Faecalibacterium sp002160895 abundance in stool | GCST011887 | RPL | IVW | 19 | 0.0363963903435641 | 0.939816286378159 | 0.886732328093098 | 0.996078099510657 | 0.915335399403932 | 0.887846964682365 |
| GCST90032419 | Gluconobacter abundance in stool | GCST011887 | RPL | IVW | 20 | 0.0396822126622182 | 0.929722275043607 | 0.867360061244119 | 0.99656826194235 | 0.947744671648097 | 0.534679783400732 |
| GCST90032256 | CAG-170 sp003516765 abundance in stool | GCST011887 | RPL | IVW | 19 | 0.0293385235921735 | 0.973417045159394 | 0.950109061286403 | 0.997296818245181 | 0.479490390167144 | 0.111203164796088 |
| GCST90032252 | CAG-110 abundance in stool | GCST011887 | RPL | IVW | 14 | 0.0333080307319779 | 0.966447000219954 | 0.936544651013263 | 0.997304082857786 | 0.285445851818933 | 0.22565410188611 |
| GCST90032533 | QALR01 sp003150035 abundance in stool | GCST011887 | RPL | IVW | 9 | 0.0408791284720956 | 0.941112006036815 | 0.887922743473162 | 0.997487466580936 | 0.510579072571126 | 0.720250449368946 |
| GCST90032189 | An181 abundance in stool | GCST011887 | RPL | IVW | 14 | 0.0417651448084904 | 0.950525741364071 | 0.905208861789937 | 0.998111290259754 | 0.89259162087768 | 0.803625625090401 |
| GCST90032611 | UBA2658 sp002841545 abundance in stool | GCST011887 | RPL | IVW | 9 | 0.0467057822869374 | 0.898392169824962 | 0.808368598689488 | 0.998441171652725 | 0.89090318157674 | 0.373704931779429 |
| GCST90032265 | CAG-245 abundance in stool | GCST011887 | RPL | IVW | 16 | 0.0360559782057592 | 0.978619337474719 | 0.959042498288187 | 0.998595796733582 | 0.927235589592637 | 0.297880138915363 |
| GCST90032264 | CAG-245 sp000435175 abundance in stool | GCST011887 | RPL | IVW | 17 | 0.0441957740688499 | 0.977007722970413 | 0.955120574156423 | 0.999396428651848 | 0.323188772269411 | 0.485266770110633 |
| GCST90032644 | Victivallis sp002998355 abundance in stool | GCST011887 | RPL | IVW | 13 | 0.049046361063947 | 0.978000828831977 | 0.956574145034764 | 0.99990745742064 | 0.484143888282802 | 0.724266814920504 |
| GCST90032185 | Alistipes shahii abundance in stool | GCST011887 | RPL | IVW | 16 | 0.0205803692489066 | 1.02419524790757 | 1.00367806407488 | 1.04513184394772 | 0.707251776472459 | 0.891708906372577 |
| GCST90032382 | Faecalicatena lactaris abundance in stool | GCST011887 | RPL | IVW | 18 | 0.0297740843219592 | 1.02704969041974 | 1.00262056097409 | 1.05207404241387 | 0.262823181149192 | 0.511941045151218 |
| GCST90032187 | Alloprevotella abundance in stool | GCST011887 | RPL | IVW | 20 | 0.0388907900205513 | 1.02933513653264 | 1.00147577018475 | 1.05796950345109 | 0.0751207841476968 | 0.312338781157505 |
| GCST90032303 | CAG-83 sp002392625 abundance in stool | GCST011887 | RPL | IVW | 18 | 0.0188193853259692 | 1.04500883988127 | 1.00731875287581 | 1.08410914848186 | 0.513381380497788 | 0.741605233386481 |
| GCST90032195 | Atopobiaceae abundance in stool | GCST011887 | RPL | IVW | 22 | 0.0130104100883566 | 1.05970504497406 | 1.01229863441087 | 1.10933151954414 | 0.435569975080695 | 0.777434165213837 |
| GCST90032384 | Faecalicatena sp001517425 abundance in stool | GCST011887 | RPL | IVW | 19 | 0.0210691605607348 | 1.06321384659243 | 1.00925645174947 | 1.12005593982219 | 0.968131321418643 | 0.430117792125558 |
| GCST90032565 | Staphylococcus aureus abundance in stool | GCST011887 | RPL | IVW | 20 | 0.0212442933233482 | 1.06879239023537 | 1.00997314198402 | 1.13103717904917 | 0.730624314685838 | 0.976217081015527 |
| GCST90032245 | Brevibacillaceae abundance in stool | GCST011887 | RPL | IVW | 16 | 0.0378484794575536 | 1.10418672829246 | 1.00557553833473 | 1.21246816818585 | 0.619802335348589 | 0.521171571176841 |
| GCST90032511 | Photobacterium abundance in stool | GCST011887 | RPL | IVW | 13 | 0.0191958020900113 | 1.1277173283275 | 1.01978548890211 | 1.24707243479142 | 0.402198806276385 | 0.753399539920137 |
| GCST90032572 | Syntrophomonadia abundance in stool | GCST011887 | RPL | IVW | 20 | 0.0283871746787289 | 1.13179444765334 | 1.01318417532244 | 1.26429005006051 | 0.131274399427533 | 0.185686287723405 |
| GCST90199689 | Glycolithocholate levels | GCST011887 | RPL | IVW | 24 | 0.0491409319804956 | 1.01872494312979 | 1.0000694701127 | 1.03772841864459 | 0.16870222648483 | 0.655439870098205 |
| GCST90199695 | Galactonate levels | GCST011887 | RPL | IVW | 16 | 0.0339434287703207 | 1.02418624603149 | 1.00181303544937 | 1.04705911127375 | 0.570028157059155 | 0.0549154603197171 |
| GCST90199700 | 3-hydroxylaurate levels | GCST011887 | RPL | IVW | 11 | 0.0197528693851988 | 1.03396221239543 | 1.00532989992762 | 1.06340998784442 | 0.963606267866073 | 0.975023971476334 |
| GCST90199714 | 3-hydroxy-2-ethylpropionate levels | GCST011887 | RPL | IVW | 29 | 0.0491821265825756 | 1.01755786597872 | 1.0000620261523 | 1.03535979123107 | 0.92065258653405 | 0.970546509045692 |
| GCST90199769 | 3-hydroxydodecanedioate levels | GCST011887 | RPL | IVW | 21 | 0.0103400475809466 | 0.974273950366472 | 0.955057232404139 | 0.993877328140086 | 0.365515965490634 | 0.819199909121182 |
| GCST90199784 | Cysteine-glutathione disulfide levels | GCST011887 | RPL | IVW | 26 | 0.0329632674952745 | 0.98356319137003 | 0.968694559930557 | 0.998660043561458 | 0.89826202679451 | 0.74123821463251 |
| GCST90199787 | Homostachydrine levels | GCST011887 | RPL | IVW | 26 | 0.0376256856036408 | 1.01878763227086 | 1.00106521069014 | 1.03682380386839 | 0.554315795512342 | 0.958194969286387 |
| GCST90199800 | Carnitine C5:1 levels | GCST011887 | RPL | IVW | 25 | 0.0447479531923476 | 0.980898273000935 | 0.962596227782366 | 0.999548298867583 | 0.972082818821981 | 0.16810569250874 |
| GCST90199807 | Hexadecanedioate (C16-DC) levels | GCST011887 | RPL | IVW | 22 | 0.0494094651895555 | 0.986705515205994 | 0.9736212026562 | 0.999965665375629 | 0.335233024068795 | 0.16300697632429 |
| GCST90199808 | Glycerophosphoethanolamine levels | GCST011887 | RPL | IVW | 23 | 0.00644361008295243 | 1.02652553875019 | 1.00737183494449 | 1.04604342225274 | 0.361572374787182 | 0.155628443300256 |
| GCST90199830 | 4-ethylphenylsulfate levels | GCST011887 | RPL | IVW | 21 | 0.0020160984997236 | 1.03357921319055 | 1.0121365811666 | 1.05547611835972 | 0.284561517158236 | 0.4144597903049 |
| GCST90199879 | Ergothioneine levels | GCST011887 | RPL | IVW | 25 | 0.0130960619297895 | 1.01428893682445 | 1.00298448889313 | 1.02572079504421 | 0.943031085580091 | 0.649088716088084 |
| GCST90199916 | Carnitine C18:2 levels | GCST011887 | RPL | IVW | 29 | 0.0156132752925135 | 0.983411485445046 | 0.970166277977742 | 0.996837523276004 | 0.347701986896217 | 0.516941375454468 |
| GCST90199920 | Trimethylamine n-oxide levels | GCST011887 | RPL | IVW | 15 | 0.0313355612676156 | 0.971250938184059 | 0.945795820836286 | 0.997391153715725 | 0.38567294912621 | 0.770896589375752 |
| GCST90199923 | N-palmitoylglycine levels | GCST011887 | RPL | IVW | 22 | 0.038889966620461 | 0.984585835599795 | 0.970177700685581 | 0.999207946109984 | 0.323503399683176 | 0.177754986303898 |
| GCST90199933 | 3b-hydroxy-5-cholenoic acid levels | GCST011887 | RPL | IVW | 28 | 0.0243812878435064 | 0.981234728892355 | 0.965182856340398 | 0.997553558747513 | 0.699877945618505 | 0.895152187564615 |
| GCST90199949 | 6-oxopiperidine-2-carboxylate levels | GCST011887 | RPL | IVW | 26 | 0.0244247082181601 | 1.01646263857065 | 1.00210921052692 | 1.03102165388416 | 0.358665451280102 | 0.697076495986554 |
| GCST90200000 | Umbelliferone sulfate levels | GCST011887 | RPL | IVW | 23 | 0.00636181663838443 | 0.977533682080711 | 0.961707472089443 | 0.993620333973448 | 0.812763558267095 | 0.343825335984482 |
| GCST90200083 | 1-(1-enyl-palmitoyl)-2-palmitoyl-GPC (P-16:0/16:0) levels | GCST011887 | RPL | IVW | 33 | 0.0338200841580649 | 1.01309869412186 | 1.00099518773893 | 1.02534854972659 | 0.771873838138129 | 0.922467668711301 |
| GCST90200099 | N-oleoylserine levels | GCST011887 | RPL | IVW | 20 | 0.0168660268028945 | 0.978952095353376 | 0.96201939687359 | 0.996182829692666 | 0.32440014587604 | 0.851525062463868 |
| GCST90200162 | 3-hydroxyphenylacetoylglutamine levels | GCST011887 | RPL | IVW | 17 | 0.0286294889448938 | 0.978430439744819 | 0.959508597449867 | 0.997725427331836 | 0.0760894393819587 | 0.3114471062817 |
| GCST90200165 | Octadecenedioate (C18:1-DC) levels | GCST011887 | RPL | IVW | 22 | 0.0252672172218964 | 0.984752411294081 | 0.971585799711884 | 0.998097452471078 | 0.171398215448387 | 0.358459022063986 |
| GCST90200188 | 3-amino-2-piperidone levels | GCST011887 | RPL | IVW | 23 | 0.00524121717165877 | 1.02898151940106 | 1.00854860036578 | 1.04982840379225 | 0.808581024272309 | 0.774869000530856 |
| GCST90200189 | Glucuronide of piperine metabolite C17H21NO3 (3) levels | GCST011887 | RPL | IVW | 20 | 0.036364147444938 | 0.982263082449502 | 0.965937315399055 | 0.99886477907171 | 0.996530801125216 | 0.654151519580809 |
| GCST90200195 | N-acetyl-isoputreanine levels | GCST011887 | RPL | IVW | 37 | 0.00487071589874374 | 1.01768298099383 | 1.00534012882869 | 1.03017736993265 | 0.138739850108145 | 0.306930369862183 |
| GCST90200242 | Taurochenodeoxycholic acid 3-sulfate levels | GCST011887 | RPL | IVW | 30 | 0.00560178862968029 | 1.0208227445879 | 1.00604581113693 | 1.0358167235847 | 0.703204035458418 | 0.667821933711737 |
| GCST90200249 | Branched-chain, straight-chain, or cyclopropyl 12:1 fatty acid levels | GCST011887 | RPL | IVW | 27 | 0.0278127037894899 | 0.981816830060085 | 0.965895368438368 | 0.998000735160107 | 0.396768743049288 | 0.774278084593095 |
| GCST90200265 | Bilirubin degradation product, C16H18N2O5 (4) levels | GCST011887 | RPL | IVW | 18 | 0.0197337355619338 | 0.98402440494744 | 0.970791261164881 | 0.997437933640097 | 0.109181348083426 | 0.506317325266485 |
| GCST90200274 | Cis-3,4-methyleneheptanoylglycine levels | GCST011887 | RPL | IVW | 22 | 0.0336217238801954 | 0.984974333994219 | 0.971312915380336 | 0.998827899089002 | 0.579125027776483 | 0.147746483454228 |
| GCST90200277 | Bilirubin degradation product, C16H18N2O5 (1) levels | GCST011887 | RPL | IVW | 22 | 0.0277246775261589 | 0.98609827934228 | 0.973882379125125 | 0.998467409786529 | 0.23113898148325 | 0.906966012880685 |
| GCST90200280 | 5-oxoproline levels | GCST011887 | RPL | IVW | 25 | 0.0244254029172336 | 1.01475569444337 | 1.00189184108719 | 1.02778471405441 | 0.770894203888594 | 0.0509161822892325 |
| GCST90200282 | Picolinate levels | GCST011887 | RPL | IVW | 22 | 0.0345675598918941 | 1.01846694723326 | 1.00132897413555 | 1.03589824063778 | 0.315777218437605 | 0.663589974427354 |
| GCST90200287 | N-acetylvaline levels | GCST011887 | RPL | IVW | 22 | 0.00139192881754476 | 1.03572196981882 | 1.01366857931427 | 1.05825515425471 | 0.789968464861508 | 0.409850944330988 |
| GCST90200288 | N-acetylleucine levels | GCST011887 | RPL | IVW | 21 | 0.0417359264604514 | 0.987379109973346 | 0.975380678203717 | 0.999525137823303 | 0.311833500975098 | 0.895681641714283 |
| GCST90200305 | 2-aminobutyrate levels | GCST011887 | RPL | IVW | 20 | 0.0478718705004223 | 1.01995098925201 | 1.00018477279657 | 1.04010783684242 | 0.776226491417174 | 0.982278340863456 |
| GCST90200308 | 3-hydroxyisobutyrate levels | GCST011887 | RPL | IVW | 19 | 0.00825868817972462 | 0.971032159908286 | 0.950080115038112 | 0.992446258638228 | 0.614946137284965 | 0.711954187893411 |
| GCST90200340 | 1-palmitoyl-2-oleoyl-gpc (16:0/18:1) levels | GCST011887 | RPL | IVW | 22 | 0.0387271393500295 | 1.02123381400286 | 1.00108898906319 | 1.04178401146813 | 0.735418676456922 | 0.713759607501437 |
| GCST90200393 | Phosphate levels (UKB data field 30810) | GCST011887 | RPL | IVW | 24 | 0.00688404678931465 | 0.973650156750722 | 0.954974583592173 | 0.992690951181955 | 0.0574157730432574 | 0.102475098618357 |
| GCST90200428 | Caprate (10:0) levels | GCST011887 | RPL | IVW | 15 | 0.0235210811196949 | 0.971749311844668 | 0.94794633420479 | 0.996149983387757 | 0.602078357778143 | 0.627374367208837 |
| GCST90200434 | 12,13-DiHOME levels | GCST011887 | RPL | IVW | 27 | 0.00357116442272258 | 0.972879092001247 | 0.955050633004677 | 0.991040364713873 | 0.597823144555884 | 0.782557760724129 |
| GCST90200437 | Fructose levels | GCST011887 | RPL | IVW | 26 | 0.022142183728603 | 1.02291736400974 | 1.00325287593594 | 1.04296729039176 | 0.839103246721074 | 0.32809556862032 |
| GCST90200438 | Alpha-ketobutyrate levels | GCST011887 | RPL | IVW | 17 | 0.0348804218058502 | 1.02599209999672 | 1.00182293996349 | 1.05074434539705 | 0.734207588611117 | 0.835150347876791 |
| GCST90200450 | Caproate (6:0) levels | GCST011887 | RPL | IVW | 23 | 0.0175679751811888 | 0.978848719874524 | 0.961727854181559 | 0.996274374537469 | 0.554606468939367 | 0.990354697232171 |
| GCST90200467 | X-11852 levels | GCST011887 | RPL | IVW | 25 | 0.0184040525736262 | 0.978262609957106 | 0.960549704807595 | 0.996302147874568 | 0.704074600617668 | 0.0521003216700746 |
| GCST90200477 | X-12127 levels | GCST011887 | RPL | IVW | 29 | 0.0494490089413279 | 1.01637824418051 | 1.00003886099414 | 1.03298459243527 | 0.132881014314917 | 0.494569263812311 |
| GCST90200481 | X-12104 levels | GCST011887 | RPL | IVW | 13 | 0.0499478523210472 | 0.974687655151656 | 0.950021122871877 | 0.999994634048948 | 0.50925510377046 | 0.360672078887121 |
| GCST90200482 | X-12193 levels | GCST011887 | RPL | IVW | 27 | 0.0410242807319441 | 1.01954033453358 | 1.00078909586222 | 1.03864290492226 | 0.703083668820504 | 0.145101221867381 |
| GCST90200500 | X-12816 levels | GCST011887 | RPL | IVW | 29 | 0.0348809797887462 | 0.98482935748521 | 0.97094174312061 | 0.998915609753789 | 0.529151468260309 | 0.739305211270762 |
| GCST90200515 | X-12849 levels | GCST011887 | RPL | IVW | 24 | 0.0201015925937708 | 1.02258438128454 | 1.0035077132837 | 1.042023696 | 0.369101327199446 | 0.369964168556818 |
| GCST90200554 | X-17346 levels | GCST011887 | RPL | IVW | 26 | 0.0471543886714363 | 0.983114179338523 | 0.966720083367187 | 0.99978629413593 | 0.994513377427253 | 0.106743457412052 |
| GCST90200555 | X-17690 levels | GCST011887 | RPL | IVW | 27 | 0.0467850672820099 | 1.0160352001796 | 1.00022598111343 | 1.03209429418623 | 0.154482754285568 | 0.516189462078107 |
| GCST90200565 | X-21258 levels | GCST011887 | RPL | IVW | 26 | 0.00607789796498255 | 0.975634679628695 | 0.958592423656915 | 0.992979919936091 | 0.211034209133102 | 0.426426263844382 |
| GCST90200597 | X-22834 levels | GCST011887 | RPL | IVW | 22 | 0.0165950304475585 | 0.978501413316974 | 0.96125591507131 | 0.996056305975799 | 0.976164943745737 | 0.921997133662557 |
| GCST90200609 | X-23587 levels | GCST011887 | RPL | IVW | 24 | 0.00012902309000649 | 1.03870090458337 | 1.01870348012293 | 1.05909088388716 | 0.927886065365375 | 0.935446258012697 |
| GCST90200640 | X-24978 levels | GCST011887 | RPL | IVW | 19 | 0.0348472662664944 | 0.981925872802908 | 0.965430424901453 | 0.99870316369838 | 0.239497564172002 | 0.935604881969213 |
| GCST90200676 | N-acetyl-L-glutamine levels | GCST011887 | RPL | IVW | 21 | 0.0243688313979015 | 0.987229533467611 | 0.976244157155028 | 0.99833852485317 | 0.122594437742062 | 0.829565901667583 |
| GCST90200678 | N-acetylasparagine levels | GCST011887 | RPL | IVW | 23 | 0.0275852302624872 | 0.989012384279544 | 0.979338866262889 | 0.998781453442019 | 0.266935199368276 | 0.95323875088838 |
| GCST90200679 | N-acetylarginine levels | GCST011887 | RPL | IVW | 26 | 0.0171262616268559 | 0.987740603435568 | 0.977774167441559 | 0.99780862714761 | 0.313405342240924 | 0.837709258555295 |
| GCST90200686 | Bilirubin (E,E) levels | GCST011887 | RPL | IVW | 29 | 0.0426744502164675 | 0.987727958298097 | 0.976004114944901 | 0.999592629441735 | 0.188731396281681 | 0.0896359772326187 |
| GCST90200687 | Bilirubin (E,Z or Z,E) levels | GCST011887 | RPL | IVW | 19 | 0.0210361722515487 | 0.98533665742737 | 0.973049685206609 | 0.997778780704289 | 0.812155703162488 | 0.573437610061355 |
| GCST90200691 | N-delta-acetylornithine levels | GCST011887 | RPL | IVW | 23 | 0.0105945438204162 | 1.01458314148231 | 1.00338070700146 | 1.02591064767067 | 0.503273618974519 | 0.218381498813456 |
| GCST90200692 | 1-palmitoyl-2-arachidonoyl-gpc (16:0/20:4n6) levels | GCST011887 | RPL | IVW | 30 | 0.0195975245837663 | 1.01262050223892 | 1.00201151855474 | 1.02334181051491 | 0.324588752961886 | 0.326758183019516 |
| GCST90200702 | Bilirubin degradation product, C17H18N2O4 (2) levels | GCST011887 | RPL | IVW | 21 | 0.0229536316834709 | 0.985044140820065 | 0.972334173189842 | 0.997920248118742 | 0.357620291547757 | 0.624342013967533 |
| GCST90200704 | Bilirubin (z,z) levels | GCST011887 | RPL | IVW | 28 | 0.0195903920899688 | 0.986475530021924 | 0.975260104080259 | 0.997819932611487 | 0.462280170924961 | 0.340092006119811 |
| GCST90200713 | Spermidine to ornithine ratio | GCST011887 | RPL | IVW | 15 | 0.0439966523377671 | 0.976781950383524 | 0.954705458874003 | 0.99936893596516 | 0.111495797992721 | 0.350215354712142 |
| GCST90200722 | S-adenosylhomocysteine (SAH) to leucine ratio | GCST011887 | RPL | IVW | 27 | 0.0451913075890704 | 0.983265542733441 | 0.967160417396103 | 0.999638850119452 | 0.557638310109043 | 0.297128698835846 |
| GCST90200760 | Methionine to methionine sulfoxide ratio | GCST011887 | RPL | IVW | 25 | 0.0105512646560415 | 0.974365251944121 | 0.955163057677751 | 0.99395347900529 | 0.898631012086188 | 0.226854276000024 |
| GCST90200763 | Phosphate to N-acetylneuraminate ratio | GCST011887 | RPL | IVW | 30 | 0.0292723452918763 | 1.02098366845581 | 1.00209618066704 | 1.04022714721816 | 0.44625475025829 | 0.949072956375891 |
| GCST90200782 | Mannose to trans-4-hydroxyproline ratio | GCST011887 | RPL | IVW | 22 | 0.0314987422955798 | 1.02167382443375 | 1.00190320235549 | 1.04183458150354 | 0.950220080085967 | 0.456700201857533 |
| GCST90200785 | Cysteine to 5-oxoproline ratio | GCST011887 | RPL | IVW | 22 | 0.00700165496111798 | 0.979067204525423 | 0.964128813525229 | 0.994237053731766 | 0.868133742138099 | 0.617503048601133 |
| GCST90200793 | Glycolithocholate to glycolithocholate sulfate ratio | GCST011887 | RPL | IVW | 27 | 0.0152073372423659 | 0.980614258426279 | 0.965235869078583 | 0.996237660279732 | 0.92564717929678 | 0.898418610387384 |
| GCST90200798 | Dopamine 4-sulfate to dopamine 3-O-sulfate ratio | GCST011887 | RPL | IVW | 23 | 0.0285646874581118 | 0.980142548528932 | 0.962700791221147 | 0.997900307340776 | 0.393712529392363 | 0.367170035412297 |
| GCST90200811 | Choline to taurocholate ratio | GCST011887 | RPL | IVW | 25 | 0.0349239022844914 | 1.01935394022085 | 1.00135722875301 | 1.0376740943267 | 0.89119651338797 | 0.849930009341194 |
| GCST90200869 | Adenosine 5'-monophosphate (AMP) to valine ratio | GCST011887 | RPL | IVW | 18 | 0.0179972820920802 | 1.02912799276331 | 1.00493574647207 | 1.05390262930455 | 0.204973318458012 | 0.09127007159735 |
| GCST90200872 | Phosphate to cysteine ratio | GCST011887 | RPL | IVW | 23 | 0.0419888017750033 | 1.02170455477598 | 1.00077774625522 | 1.04306895427687 | 0.625898248456068 | 0.797914453997242 |
| GCST90200894 | Inosine to theophylline ratio | GCST011887 | RPL | IVW | 20 | 0.00333562836522905 | 0.975444108317829 | 0.95938226424064 | 0.991774857548653 | 0.512099277945957 | 0.142851549990448 |
| GCST90200900 | Phosphate to oleoyl-linoleoyl-glycerol (18:1 to 18:2) [2] ratio | GCST011887 | RPL | IVW | 30 | 0.0388267879692175 | 0.983799331827754 | 0.968672674920267 | 0.999162204492247 | 0.848103451720188 | 0.240147705851867 |
| GCST90200906 | 2'-deoxyuridine to cytidine ratio | GCST011887 | RPL | IVW | 28 | 0.0455614975095715 | 0.983033749116596 | 0.966681535531139 | 0.9996625738499 | 0.129963092876704 | 0.649960538759293 |
| GCST90200954 | Cytidine to N-acetylneuraminate ratio | GCST011887 | RPL | IVW | 26 | 0.000440414795737014 | 1.03265963918046 | 1.01431685139212 | 1.0513341358065 | 0.327610116960566 | 0.208955146468538 |
| GCST90200968 | Phosphate to 5-oxoproline ratio | GCST011887 | RPL | IVW | 24 | 0.00422324348761343 | 0.979146463336403 | 0.965111721288889 | 0.993385299873701 | 0.121097159867986 | 0.694243410226897 |
| GCST90200978 | Caffeine to paraxanthine ratio | GCST011887 | RPL | IVW | 26 | 0.0366388906835231 | 0.983359207712675 | 0.968003479736086 | 0.998958528183121 | 0.367148472326795 | 0.102916266889768 |
| GCST90201018 | Bilirubin (Z,Z) to glucuronate ratio | GCST011887 | RPL | IVW | 21 | 0.0033495540377316 | 0.979663512355695 | 0.966307683335829 | 0.993203939068287 | 0.669948672292981 | 0.971057356442207 |
| GCST90032185 | Alistipes shahii abundance in stool | GCST90200165 | Octadecenedioate (C18:1-DC) levels | IVW | 16 | 0.0309813074773158 | 1.09819336323034 | 1.00860374543176 | 1.1957408134816 | 0.919893142761346 | 0.131795560472622 |
| GCST90032185 | Alistipes shahii abundance in stool | GCST90200242 | Taurochenodeoxycholic,acid,3-sulfate,levels | IVW | 16 | 0.0348703285301084 | 1.10602151493996 | 1.00718320874455 | 1.21455915953456 | 0.70370844516325 | 0.423614587686957 |
| GCST90032189 | An181 abundance in stool | GCST90199923 | N-palmitoylglycine levels | IVW | 14 | 0.0299456196335978 | 0.792055375498311 | 0.641716222077039 | 0.977615488393335 | 0.869041836972474 | 0.485320078930457 |
| GCST90032189 | An181 abundance in stool | GCST90199933 | 3b-hydroxy-5-cholenoic,acid,levels | IVW | 14 | 0.0172013278308332 | 0.749760327568342 | 0.5915890772022 | 0.950221311478427 | 0.560544797233236 | 0.115047240468099 |
| GCST90032189 | An181 abundance in stool | GCST90200308 | 3-hydroxyisobutyrate,levels | IVW | 14 | 0.00778391274807491 | 0.743903578959024 | 0.598261448538661 | 0.92500116151523 | 0.975482579672257 | 0.907816784693443 |
| GCST90032189 | An181 abundance in stool | GCST90200437 | Fructose,levels | IVW | 14 | 0.00561420521447842 | 1.35841134059167 | 1.09366401925733 | 1.68724703177227 | 0.80908866234549 | 0.35955158502698 |
| GCST90032189 | An181 abundance in stool | GCST90200609 | X-23587,levels | IVW | 14 | 0.0404408331302241 | 1.26388517383938 | 1.01024820905991 | 1.58120125165821 | 0.197354155960425 | 0.267640166998999 |
| GCST90032189 | An181 abundance in stool | GCST90200811 | Choline,to,taurocholate,ratio | IVW | 14 | 0.0188759287763684 | 0.763387256925807 | 0.609347044538854 | 0.956368147280887 | 0.709472812189016 | 0.109763236811729 |
| GCST90032195 | Atopobiaceae abundance in stool | GCST90200249 | Branched-chain, straight-chain, or cyclopropyl 12:1 fatty acid levels | IVW | 23 | 0.0301953981053274 | 0.811062356384215 | 0.671143857560163 | 0.980150735991124 | 0.0642689508543607 | 0.158253012611754 |
| GCST90032195 | Atopobiaceae abundance in stool | GCST90200477 | X-12127 levels | IVW | 23 | 0.00321132316876186 | 1.4069677990392 | 1.12112622394924 | 1.76568734656842 | 0.483172556882296 | 0.779631615260214 |
| GCST90032195 | Atopobiaceae abundance in stool | GCST90200481 | X-12104 levels | IVW | 23 | 0.0324482303601147 | 0.795985863373828 | 0.645798093341824 | 0.981101525729674 | 0.294577606927892 | 0.909884441322383 |
| GCST90032195 | Atopobiaceae abundance in stool | GCST90200640 | X-24978 levels | IVW | 23 | 0.0304335537040712 | 0.766293604956987 | 0.602154410931911 | 0.975174935759747 | 0.261787481743047 | 0.164308939659896 |
| GCST90032245 | Brevibacillaceae abundance in stool | GCST90200691 | N-delta-acetylornithine levels | IVW | 16 | 0.0313268289786072 | 0.6406210155115 | 0.427101020778639 | 0.960885751962854 | 0.31916132825649 | 0.613287758427967 |
| GCST90032245 | Brevibacillaceae abundance in stool | GCST90200872 | Phosphate,to,cysteine,ratio | IVW | 16 | 0.0226057288144378 | 0.629144984484661 | 0.422424885576908 | 0.937026735443453 | 0.369757577624123 | 0.452404673428078 |
| GCST90032252 | CAG-110 abundance in stool | GCST90199879 | Ergothioneine levels | IVW | 16 | 0.0400315539060619 | 0.880831403758078 | 0.780355964789466 | 0.994243648865745 | 0.993410711406524 | 0.961647186966061 |
| GCST90032252 | CAG-110 abundance in stool | GCST90200555 | X-17690 levels | IVW | 16 | 0.0374422201614172 | 0.868956213829171 | 0.761272696057798 | 0.991871776647826 | 0.0999924544725902 | 0.70733115071985 |
| GCST90032252 | CAG-110 abundance in stool | GCST90200565 | X-21258,levels | IVW | 16 | 0.0342128782208769 | 0.875811081681917 | 0.774650394815361 | 0.990182224046599 | 0.489528165696341 | 0.762021855903565 |
| GCST90032252 | CAG-110 abundance in stool | GCST90200722 | S-adenosylhomocysteine (SAH) to leucine ratio | IVW | 16 | 0.00409246489728183 | 1.21404164262342 | 1.06347466471573 | 1.38592592651725 | 0.205873320591345 | 0.0780800697038982 |
| GCST90032256 | CAG-170 sp003516765 abundance in stool | GCST90199784 | Cysteine-glutathione disulfide levels | IVW | 18 | 0.000294585791241481 | 0.812700002771113 | 0.726379241098701 | 0.909278868577166 | 0.440441156257515 | 0.454975620230954 |
| GCST90032256 | CAG-170 sp003516765 abundance in stool | GCST90200162 | 3-hydroxyphenylacetoylglutamine,levels | IVW | 18 | 0.00461880645412679 | 1.21077367367487 | 1.06068318217121 | 1.38210251044361 | 0.406178600574554 | 0.419155533110198 |
| GCST90032256 | CAG-170 sp003516765 abundance in stool | GCST90200165 | Octadecenedioate (C18:1-DC) levels | IVW | 18 | 0.0439558935854538 | 0.896166024197132 | 0.805499512287709 | 0.997037900922325 | 0.329865439583214 | 0.180623516500948 |
| GCST90032256 | CAG-170 sp003516765 abundance in stool | GCST90200978 | Caffeine to paraxanthine ratio | IVW | 18 | 0.0335020993850092 | 1.12860480644174 | 1.00949189425266 | 1.26177220082224 | 0.578495827628136 | 0.683004763577583 |
| GCST90032264 | CAG-245 sp000435175 abundance in stool | GCST90200277 | Bilirubin,degradation,product,,C16H18N2O5,(1),levels | IVW | 16 | 0.0264121481711114 | 0.890684133734089 | 0.804150979780701 | 0.986528955423258 | 0.905146410375463 | 0.924788817114414 |
| GCST90032264 | CAG-245 sp000435175 abundance in stool | GCST90200722 | S-adenosylhomocysteine (SAH) to leucine ratio | IVW | 16 | 0.0273266812366314 | 0.882706501164302 | 0.790119474078657 | 0.986142973005824 | 0.324082968378636 | 0.45636201624809 |
| GCST90032265 | CAG-245 abundance in stool | GCST90200000 | Umbelliferone sulfate levels | IVW | 15 | 0.0364568109502005 | 0.889742527983984 | 0.797490183441695 | 0.992666471061593 | 0.0800496782476242 | 0.665237951956891 |
| GCST90032265 | CAG-245 abundance in stool | GCST90200195 | N-acetyl-isoputreanine levels | IVW | 15 | 0.0335531999991844 | 0.909817696423397 | 0.83387886586555 | 0.992672046995661 | 0.252827329794462 | 0.164610954495449 |
| GCST90032265 | CAG-245 abundance in stool | GCST90200722 | S-adenosylhomocysteine (SAH) to leucine ratio | IVW | 15 | 0.0199297256289823 | 0.891130327764216 | 0.80870385429658 | 0.981958051568691 | 0.371248759580453 | 0.609208069810837 |
| GCST90032265 | CAG-245 abundance in stool | GCST90200763 | Phosphate to N-acetylneuraminate ratio | IVW | 15 | 0.0054922715908139 | 1.12712304367363 | 1.03582271624769 | 1.22647083873793 | 0.694063702538341 | 0.564247957827803 |
| GCST90032265 | CAG-245 abundance in stool | GCST90200793 | Glycolithocholate,to,glycolithocholate,sulfate,ratio | IVW | 15 | 0.0303133549385149 | 0.897956286162843 | 0.814620915130358 | 0.989816829991819 | 0.182239328384915 | 0.73044137334513 |
| GCST90032281 | CAG-449 abundance in stool | GCST90200242 | Taurochenodeoxycholic,acid,3-sulfate,levels | IVW | 23 | 0.0162922076219005 | 1.18663261419446 | 1.03200745390096 | 1.36442518486412 | 0.969473994365011 | 0.928978316037148 |
| GCST90032281 | CAG-449 abundance in stool | GCST90200438 | Alpha-ketobutyrate levels | IVW | 23 | 0.0384985312414231 | 1.14830715887514 | 1.00734432957055 | 1.30899563576841 | 0.611575355216515 | 0.655718631495733 |
| GCST90032290 | CAG-495 abundance in stool | GCST90200188 | 3-amino-2-piperidone levels | IVW | 21 | 0.0249041636699593 | 0.948719197194991 | 0.90606406625854 | 0.993382420343639 | 0.588976646379521 | 0.845795306241618 |
| GCST90032290 | CAG-495 abundance in stool | GCST90200713 | Spermidine,to,ornithine,ratio | IVW | 21 | 0.0108991187307077 | 1.06912262694822 | 1.01550107475886 | 1.12557556054197 | 0.669612439931858 | 0.91545281834374 |
| GCST90032290 | CAG-495 abundance in stool | GCST90200722 | S-adenosylhomocysteine (SAH) to leucine ratio | IVW | 22 | 0.0314232579332215 | 0.944985402664791 | 0.897510082388403 | 0.994972010646546 | 0.156899680050334 | 0.942750274331545 |
| GCST90032290 | CAG-495 abundance in stool | GCST90200894 | Inosine to theophylline ratio | IVW | 21 | 0.0229184590478731 | 0.927284240054386 | 0.868886240053593 | 0.989607180107035 | 0.0648735794372524 | 0.317580021991862 |
| GCST90032303 | CAG-83 sp002392625 abundance in stool | GCST90199879 | Ergothioneine levels | IVW | 16 | 0.045312343716176 | 1.18044808822983 | 1.00346546144841 | 1.3886453919342 | 0.972211151923954 | 0.251490529118972 |
| GCST90032303 | CAG-83 sp002392625 abundance in stool | GCST90200162 | 3-hydroxyphenylacetoylglutamine,levels | IVW | 16 | 0.012628246374565 | 1.28879414363896 | 1.0558318595091 | 1.57315800780093 | 0.407032223381879 | 0.106515309408037 |
| GCST90032303 | CAG-83 sp002392625 abundance in stool | GCST90200277 | Bilirubin,degradation,product,,C16H18N2O5,(1),levels | IVW | 16 | 0.0373138061504145 | 0.840189991819737 | 0.713176508685625 | 0.98982399694439 | 0.861780349499518 | 0.246636824843697 |
| GCST90032303 | CAG-83 sp002392625 abundance in stool | GCST90200686 | Bilirubin (E,E) levels | IVW | 16 | 0.0235875824504128 | 0.830174367333572 | 0.70661924641639 | 0.975333581236163 | 0.355322488968026 | 0.285917289912457 |
| GCST90032380 | Faecalibacterium sp002160895 abundance in stool | GCST90199769 | 3-hydroxydodecanedioate levels | IVW | 19 | 0.0183819194557403 | 1.37100351165899 | 1.05468389750659 | 1.78219335046738 | 0.898193872126313 | 0.124602588857963 |
| GCST90032380 | Faecalibacterium sp002160895 abundance in stool | GCST90199784 | Cysteine-glutathione disulfide levels | IVW | 19 | 0.0225249685119905 | 0.741464979400057 | 0.573432839792034 | 0.958735317419406 | 0.162531042484531 | 0.779083266634612 |
| GCST90032380 | Faecalibacterium sp002160895 abundance in stool | GCST90200242 | Taurochenodeoxycholic,acid,3-sulfate,levels | IVW | 19 | 0.024316735903502 | 1.3613969766834 | 1.0408241040417 | 1.78070600106744 | 0.895656597337972 | 0.387216759239505 |
| GCST90032380 | Faecalibacterium sp002160895 abundance in stool | GCST90200287 | N-acetylvaline levels | IVW | 19 | 0.0110737198200266 | 1.3632385615644 | 1.07335622965917 | 1.73140968895879 | 0.381170861636117 | 0.280069592948882 |
| GCST90032380 | Faecalibacterium sp002160895 abundance in stool | GCST90200288 | N-acetylleucine levels | IVW | 19 | 0.00817297053219386 | 1.40659304294093 | 1.09236023704931 | 1.81121934078648 | 0.802336906196324 | 0.900982539972285 |
| GCST90032380 | Faecalibacterium sp002160895 abundance in stool | GCST90200482 | X-12193 levels | IVW | 19 | 0.0441499178204612 | 0.769667333360606 | 0.596459796619969 | 0.993173064470366 | 0.256821168352358 | 0.607833333411752 |
| GCST90032380 | Faecalibacterium sp002160895 abundance in stool | GCST90200515 | X-12849 levels | IVW | 19 | 0.0456594459723637 | 1.306481001 | 1.00516708359278 | 1.69811828736316 | 0.461515631001911 | 0.391810463897512 |
| GCST90032380 | Faecalibacterium sp002160895 abundance in stool | GCST90200676 | N-acetyl-L-glutamine levels | IVW | 19 | 0.00445611464099674 | 1.42556715163542 | 1.1165065302263 | 1.82017896788298 | 0.686323537935874 | 0.301374930046553 |
| GCST90032380 | Faecalibacterium sp002160895 abundance in stool | GCST90200691 | N-delta-acetylornithine levels | IVW | 19 | 0.0166230712400556 | 0.738672974098074 | 0.576493679193392 | 0.946476574428933 | 0.525826391262573 | 0.73719842673203 |
| GCST90032382 | Faecalicatena lactaris abundance in stool | GCST90199949 | 6-oxopiperidine-2-carboxylate levels | IVW | 17 | 0.045444389915444 | 0.890492477417743 | 0.794841765380457 | 0.997653730435296 | 0.838302780941548 | 0.968173732377771 |
| GCST90032382 | Faecalicatena lactaris abundance in stool | GCST90200692 | 1-palmitoyl-2-arachidonoyl-gpc (16:0/20:4n6) levels | IVW | 17 | 0.00703676267358463 | 1.16688939729361 | 1.0429959553609 | 1.30549966039425 | 0.731482969760347 | 0.103431013952129 |
| GCST90032382 | Faecalicatena lactaris abundance in stool | GCST90200722 | S-adenosylhomocysteine (SAH) to leucine ratio | IVW | 17 | 0.00670598617575038 | 0.845147109803293 | 0.748355233010958 | 0.954457997621033 | 0.725100528349101 | 0.113364302905486 |
| GCST90032384 | Faecalicatena sp001517425 abundance in stool | GCST90200678 | N-acetylasparagine levels | IVW | 20 | 0.0430781570539438 | 0.79433793948082 | 0.635509880003981 | 0.992860665037471 | 0.554074998103142 | 0.46321865805555 |
| GCST90032388 | Faecalicoccus pleomorphus abundance in stool | GCST90199879 | Ergothioneine levels | IVW | 18 | 0.0478468260096843 | 1.17037923962704 | 1.00149003346126 | 1.3677495719212 | 0.477982088007866 | 0.979845392071489 |
| GCST90032388 | Faecalicoccus pleomorphus abundance in stool | GCST90200083 | 1-(1-enyl-palmitoyl)-2-palmitoyl-GPC (P-16:0/16:0) levels | IVW | 18 | 0.0444314503557705 | 1.17344240138894 | 1.00398638092016 | 1.37149974894623 | 0.63284599340166 | 0.184128075295695 |
| GCST90032388 | Faecalicoccus pleomorphus abundance in stool | GCST90200691 | N-delta-acetylornithine levels | IVW | 18 | 0.0414286226947907 | 0.850993645731295 | 0.728743491388899 | 0.993751839477592 | 0.236863195982137 | 0.459014225222647 |
| GCST90032388 | Faecalicoccus pleomorphus abundance in stool | GCST90200869 | Adenosine,5'-monophosphate,(AMP),to,valine,ratio | IVW | 18 | 0.0163364236369123 | 0.828720143369942 | 0.710903635763505 | 0.966062123580931 | 0.446091417805831 | 0.239187483940205 |
| GCST90032393 | Fibrobacterales abundance in stool | GCST90199695 | Galactonate levels | IVW | 16 | 0.0440592497021912 | 0.519665196310033 | 0.274792160836853 | 0.982749709575151 | 0.741752604967736 | 0.712627755178466 |
| GCST90032393 | Fibrobacterales abundance in stool | GCST90200428 | Caprate (10:0) levels | IVW | 16 | 0.00155882331110378 | 0.37936187583541 | 0.208089217116105 | 0.69160447058178 | 0.95035816211976 | 0.922993333561088 |
| GCST90032393 | Fibrobacterales abundance in stool | GCST90200713 | Spermidine,to,ornithine,ratio | IVW | 16 | 0.0385667660231845 | 0.501569168796616 | 0.260866757714531 | 0.964368297790651 | 0.0668205805121299 | 0.299684840301698 |
| GCST90032393 | Fibrobacterales abundance in stool | GCST90200900 | Phosphate to oleoyl-linoleoyl-glycerol (18:1 to 18:2) [2] ratio | IVW | 16 | 0.00630172250920326 | 0.42307386909641 | 0.228225740497868 | 0.784273931247814 | 0.398582587420932 | 0.312534359344681 |
| GCST90032419 | Gluconobacter abundance in stool | GCST90199933 | 3b-hydroxy-5-cholenoic,acid,levels | IVW | 18 | 0.00105237180252774 | 1.83072384195493 | 1.27498382295542 | 2.62869985105639 | 0.768114724022379 | 0.985604608022341 |
| GCST90032419 | Gluconobacter abundance in stool | GCST90200305 | 2-aminobutyrate,levels | IVW | 17 | 0.0351163619054334 | 0.696783073076996 | 0.497900814139523 | 0.975107164196305 | 0.768927200963008 | 0.221062912070397 |
| GCST90032419 | Gluconobacter abundance in stool | GCST90200515 | X-12849 levels | IVW | 18 | 0.0446122679063293 | 1.42463374860992 | 1.00854666376357 | 2.01238216395918 | 0.240224484991874 | 0.720065451831926 |
| GCST90032419 | Gluconobacter abundance in stool | GCST90200968 | Phosphate,to,5-oxoproline,ratio | IVW | 18 | 0.0287592174969184 | 0.698565791398256 | 0.506489629942581 | 0.963483033141654 | 0.211557072443155 | 0.915822392455912 |
| GCST90032455 | Lactobacillus B salivarius abundance in stool | GCST90199807 | Hexadecanedioate (C16-DC) levels | IVW | 29 | 0.0276051675355016 | 1.16155009943279 | 1.016646739 | 1.32710663619736 | 0.687578452277987 | 0.933835394703543 |
| GCST90032455 | Lactobacillus B salivarius abundance in stool | GCST90200000 | Umbelliferone sulfate levels | IVW | 29 | 0.0375064165921363 | 1.19550171155656 | 1.01037216489773 | 1.41455237187708 | 0.407124541806235 | 0.100623291538288 |
| GCST90032455 | Lactobacillus B salivarius abundance in stool | GCST90200265 | Bilirubin degradation product, C16H18N2O5 (4) levels | IVW | 29 | 0.0385679788715409 | 1.15426670998915 | 1.00757129800324 | 1.32231995932153 | 0.978337721210375 | 0.93975004930118 |
| GCST90032455 | Lactobacillus B salivarius abundance in stool | GCST90200393 | Phosphate levels (UKB data field 30810) | IVW | 29 | 0.0168335298665708 | 1.17827636086099 | 1.02997442144106 | 1.34793170943156 | 0.498613004137156 | 0.759935500477701 |
| GCST90032455 | Lactobacillus B salivarius abundance in stool | GCST90200686 | Bilirubin (E,E) levels | IVW | 29 | 0.0147739349747188 | 1.1847291926204 | 1.03378652067091 | 1.35771093139818 | 0.867969873396964 | 0.497822091388642 |
| GCST90032511 | Photobacterium abundance in stool | GCST90199689 | Glycolithocholate levels | IVW | 14 | 0.0137349382978401 | 1.74846695375525 | 1.12109915271499 | 2.72691017647334 | 0.941614541229476 | 0.0639268662241803 |
| GCST90032511 | Photobacterium abundance in stool | GCST90200188 | 3-amino-2-piperidone levels | IVW | 14 | 0.00288463071127768 | 1.81636282507215 | 1.22661227331804 | 2.68966321638026 | 0.0795827223570801 | 0.685182679866246 |
| GCST90032511 | Photobacterium abundance in stool | GCST90200195 | N-acetyl-isoputreanine levels | IVW | 14 | 0.0250669743254292 | 1.58187589478885 | 1.0590714445822 | 2.36275971683967 | 0.931361157369104 | 0.583785565299223 |
| GCST90032511 | Photobacterium abundance in stool | GCST90200305 | 2-aminobutyrate,levels | IVW | 14 | 0.0485789894342833 | 0.659033862615772 | 0.435453639261479 | 0.997409581444471 | 0.353766863834063 | 0.455531043243614 |
| GCST90032511 | Photobacterium abundance in stool | GCST90200438 | Alpha-ketobutyrate levels | IVW | 14 | 0.0391879085457096 | 0.64570838742384 | 0.426076846274355 | 0.978554280138059 | 0.723682997866372 | 0.487735833336029 |
| GCST90032511 | Photobacterium abundance in stool | GCST90200555 | X-17690 levels | IVW | 14 | 0.0184303694546325 | 1.7090940215777 | 1.09444519088824 | 2.66893435953791 | 0.286770295208344 | 0.394726359804923 |
| GCST90032511 | Photobacterium abundance in stool | GCST90200906 | 2'-deoxyuridine,to,cytidine,ratio | IVW | 14 | 0.03601250815649 | 0.635824442487473 | 0.416393511083292 | 0.970891022323445 | 0.0703614460991517 | 0.751886823116011 |
| GCST90032555 | Ruminococcus abundance in stool | GCST90199714 | 3-hydroxy-2-ethylpropionate levels | IVW | 15 | 0.038979278235074 | 0.753702981040951 | 0.576250029914342 | 0.985801569007221 | 0.496388472316533 | 0.488877570384706 |
| GCST90032555 | Ruminococcus abundance in stool | GCST90199920 | Trimethylamine n-oxide levels | IVW | 15 | 0.0415746736216904 | 0.761410881630641 | 0.585807747898272 | 0.989653231363928 | 0.587093164360591 | 0.959273329668364 |
| GCST90032555 | Ruminococcus abundance in stool | GCST90200450 | Caproate (6:0) levels | IVW | 15 | 0.0263858581519702 | 0.725439914106113 | 0.546456676061674 | 0.963046279846144 | 0.16549513301847 | 0.687434305491537 |
| GCST90032555 | Ruminococcus abundance in stool | GCST90200515 | X-12849 levels | IVW | 15 | 0.0327940310398956 | 1.36584051006612 | 1.02582866243654 | 1.81854959531615 | 0.720187823749253 | 0.254870632445142 |
| GCST90032555 | Ruminococcus abundance in stool | GCST90200763 | Phosphate to N-acetylneuraminate ratio | IVW | 15 | 0.0211258012327878 | 1.35384036712708 | 1.04647211957378 | 1.75148836302425 | 0.515701001046596 | 0.603812776240876 |
| GCST90032555 | Ruminococcus abundance in stool | GCST90200894 | Inosine to theophylline ratio | IVW | 15 | 0.0475010407635054 | 0.690592931245135 | 0.478865172267805 | 0.995935023687694 | 0.309886625618204 | 0.75533682578717 |
| GCST90032555 | Ruminococcus abundance in stool | GCST90201018 | Bilirubin,(Z,Z),to,glucuronate,ratio | IVW | 15 | 0.0348003484173934 | 1.33947864208368 | 1.02108411584233 | 1.7571549735824 | 0.832379236774814 | 0.0549714649057186 |
| GCST90032565 | Staphylococcus aureus abundance in stool | GCST90199784 | Cysteine-glutathione disulfide levels | IVW | 21 | 0.0190161878160555 | 1.33699387708102 | 1.04885973014793 | 1.70428187485091 | 0.945155055770702 | 0.560763473173549 |
| GCST90032565 | Staphylococcus aureus abundance in stool | GCST90200099 | N-oleoylserine,levels | IVW | 21 | 0.00403149142114538 | 1.42530320539074 | 1.11945780564136 | 1.81470817127694 | 0.411069170037167 | 0.973667061588103 |
| GCST90032565 | Staphylococcus aureus abundance in stool | GCST90200165 | Octadecenedioate (C18:1-DC) levels | IVW | 21 | 0.0164994153998404 | 1.32629432332285 | 1.05289954892803 | 1.67067849337512 | 0.788503619164914 | 0.355223627269125 |
| GCST90032565 | Staphylococcus aureus abundance in stool | GCST90200428 | Caprate (10:0) levels | IVW | 21 | 0.0161461228936241 | 1.32804641545577 | 1.05395764836399 | 1.67341380779639 | 0.608682979273494 | 0.0938848625914461 |
| GCST90032565 | Staphylococcus aureus abundance in stool | GCST90200713 | Spermidine,to,ornithine,ratio | IVW | 21 | 0.0289330133708977 | 1.32423509524822 | 1.02926969159483 | 1.70373090921378 | 0.912759253650671 | 0.250405136464224 |
| GCST90032572 | Syntrophomonadia abundance in stool | GCST90200242 | Taurochenodeoxycholic,acid,3-sulfate,levels | IVW | 19 | 0.0275288549550036 | 1.80206220524117 | 1.06735549758832 | 3.04249914756256 | 0.841875791188908 | 0.709964883914688 |
| GCST90032572 | Syntrophomonadia abundance in stool | GCST90200265 | Bilirubin degradation product, C16H18N2O5 (4) levels | IVW | 19 | 0.0109851081000743 | 1.86455534 | 1.15357367663184 | 3.01373608655448 | 0.359999715168757 | 0.471361357530794 |
| GCST90032572 | Syntrophomonadia abundance in stool | GCST90200678 | N-acetylasparagine levels | IVW | 19 | 0.0383630435855833 | 1.68702876560349 | 1.02841507447432 | 2.76742934503213 | 0.412376515722289 | 0.905654370508152 |
| GCST90032572 | Syntrophomonadia abundance in stool | GCST90200679 | N-acetylarginine,levels | IVW | 19 | 0.0305394720087265 | 1.70453626447184 | 1.05132904466184 | 2.76359137194212 | 0.104359994736195 | 0.294510541284974 |
| GCST90032572 | Syntrophomonadia abundance in stool | GCST90200686 | Bilirubin (E,E) levels | IVW | 19 | 0.0109453382743689 | 1.86773790958667 | 1.15430159101581 | 3.02212604232598 | 0.0891951730656167 | 0.816906745521383 |
| GCST90032572 | Syntrophomonadia abundance in stool | GCST90200687 | Bilirubin (E,Z or Z,E) levels | IVW | 19 | 0.00913774427044412 | 1.88241239000859 | 1.16994878109881 | 3.02874490174674 | 0.831144720666019 | 0.869760419324876 |
| GCST90032572 | Syntrophomonadia abundance in stool | GCST90200702 | Bilirubin degradation product, C17H18N2O4 (2) levels | IVW | 19 | 0.0321581475141902 | 1.67181125236247 | 1.04473344580976 | 2.67527844038669 | 0.50232845604095 | 0.796063267920189 |
| GCST90032572 | Syntrophomonadia abundance in stool | GCST90200704 | Bilirubin (z,z) levels | IVW | 19 | 0.0266913135675443 | 1.70909991067054 | 1.06387439979907 | 2.74564601348219 | 0.738198692917285 | 0.804954064718024 |
| GCST90032572 | Syntrophomonadia abundance in stool | GCST90200869 | Adenosine,5'-monophosphate,(AMP),to,valine,ratio | IVW | 19 | 0.00579038735165055 | 0.510010573565091 | 0.316136361208461 | 0.822780347549694 | 0.263562956669008 | 0.758828244403097 |
| GCST90032572 | Syntrophomonadia abundance in stool | GCST90201018 | Bilirubin,(Z,Z),to,glucuronate,ratio | IVW | 19 | 0.0137298528307412 | 1.83666064078823 | 1.13247237850994 | 2.97872369643056 | 0.257548927716084 | 0.190322910411349 |
| GCST90032611 | UBA2658 sp002841545 abundance in stool | GCST90199784 | Cysteine-glutathione disulfide levels | IVW | 10 | 0.0282693073394411 | 1.62780977532635 | 1.05324127589383 | 2.51581923847346 | 0.267566987921838 | 0.265771818369412 |
| GCST90032611 | UBA2658 sp002841545 abundance in stool | GCST90199933 | 3b-hydroxy-5-cholenoic,acid,levels | IVW | 10 | 0.0423074296250943 | 1.61907720614396 | 1.01686716175205 | 2.57792865976541 | 0.192450415342365 | 0.427554490982503 |
| GCST90032611 | UBA2658 sp002841545 abundance in stool | GCST90200265 | Bilirubin degradation product, C16H18N2O5 (4) levels | IVW | 9 | 0.0481102952287563 | 1.56903031622067 | 1.0037432440689 | 2.45267517143113 | 0.721899562945816 | 0.0639227805014886 |
| GCST90032611 | UBA2658 sp002841545 abundance in stool | GCST90200393 | Phosphate levels (UKB data field 30810) | IVW | 10 | 0.0154238749851784 | 0.600534319582179 | 0.397502521431438 | 0.907268380832736 | 0.25058392471909 | 0.287085313029678 |
| GCST90032611 | UBA2658 sp002841545 abundance in stool | GCST90200481 | X-12104 levels | IVW | 10 | 0.0236929633327021 | 0.594248261288967 | 0.378546855491094 | 0.932859409403465 | 0.352360564275094 | 0.449075415010994 |
| GCST90032611 | UBA2658 sp002841545 abundance in stool | GCST90200640 | X-24978 levels | IVW | 10 | 0.0102005419043743 | 0.507787406832085 | 0.302782121560785 | 0.851596022935883 | 0.0723014652384253 | 0.296592582679879 |
| GCST90032611 | UBA2658 sp002841545 abundance in stool | GCST90200686 | Bilirubin (E,E) levels | IVW | 9 | 0.00228719259319703 | 2.0075887746145 | 1.28285991148502 | 3.14174030373482 | 0.685236048122583 | 0.182754959604361 |
| GCST90032611 | UBA2658 sp002841545 abundance in stool | GCST90200687 | Bilirubin (E,Z or Z,E) levels | IVW | 9 | 0.000649364958995217 | 2.15941451775969 | 1.38730702223871 | 3.36123942628539 | 0.930190193795336 | 0.0500801327554698 |
| GCST90032611 | UBA2658 sp002841545 abundance in stool | GCST90200793 | Glycolithocholate,to,glycolithocholate,sulfate,ratio | IVW | 10 | 0.00310663166549616 | 2.00220241093564 | 1.2637385803447 | 3.17218652394315 | 0.431366857829706 | 0.639978530694122 |
| GCST90032611 | UBA2658 sp002841545 abundance in stool | GCST90200872 | Phosphate,to,cysteine,ratio | IVW | 10 | 0.0195282334790299 | 0.61213526911466 | 0.405461201229515 | 0.924156458269777 | 0.986592393668061 | 0.842495934216835 |
| GCST90032611 | UBA2658 sp002841545 abundance in stool | GCST90200978 | Caffeine to paraxanthine ratio | IVW | 10 | 0.0313403041749175 | 1.60654160033329 | 1.04335641637935 | 2.4737241014513 | 0.0871932281630201 | 0.123049468681039 |
| GCST90032628 | UBA737 sp002451855 abundance in stool | GCST90199714 | 3-hydroxy-2-ethylpropionate levels | IVW | 17 | 0.0395825833360188 | 1.18473031004454 | 1.00811103847735 | 1.39229296572152 | 0.655524549450087 | 0.178248092160994 |
| GCST90032628 | UBA737 sp002451855 abundance in stool | GCST90199933 | 3b-hydroxy-5-cholenoic,acid,levels | IVW | 18 | 0.0425825456262225 | 0.832866796953281 | 0.697920534592243 | 0.993905562432677 | 0.295377258945128 | 0.789353635205516 |
| GCST90032628 | UBA737 sp002451855 abundance in stool | GCST90200450 | Caproate (6:0) levels | IVW | 18 | 0.00291880283455182 | 1.28855096812317 | 1.09041647851393 | 1.52268755119509 | 0.533171570415892 | 0.69079716354577 |
| GCST90032644 | Victivallis sp002998355 abundance in stool | GCST90199700 | 3-hydroxylaurate levels | IVW | 12 | 0.0431130534128459 | 0.905395257723386 | 0.822266449054725 | 0.996928153459706 | 0.373171553129196 | 0.337959210349462 |
| GCST90032644 | Victivallis sp002998355 abundance in stool | GCST90200467 | X-11852,levels | IVW | 12 | 0.0290584985095638 | 0.889333509712181 | 0.80043497794014 | 0.98810535932893 | 0.978661243055394 | 0.20682908562823 |
| GCST90199689 | Glycolithocholate levels | GCST90032252 | CAG-110 abundance in stool | IVW | 22 | 0.00840595012359098 | 1.08332628390835 | 1.02072149338153 | 1.14977086797563 | 0.567896669227963 | 0.148892141769672 |
| GCST90199689 | Glycolithocholate levels | GCST90032505 | Pararhizobium abundance in stool | IVW | 22 | 0.0182820467213922 | 1.01958450356143 | 1.00329174186494 | 1.03614184840221 | 0.571412978639771 | 0.352070243484661 |
| GCST90199695 | Galactonate levels | GCST90032380 | Faecalibacterium sp002160895 abundance in stool | IVW | 12 | 0.0264547978689214 | 1.03749359637189 | 1.00431232796547 | 1.07177113387946 | 0.95002785270993 | 0.964949721020205 |
| GCST90199714 | 3-hydroxy-2-ethylpropionate levels | GCST90032185 | Alistipes shahii abundance in stool | IVW | 26 | 0.0116756468451227 | 1.10207830136789 | 1.02188956369531 | 1.18855953274816 | 0.68149327289483 | 0.322511454963737 |
| GCST90199714 | 3-hydroxy-2-ethylpropionate levels | GCST90032189 | An181 abundance in stool | IVW | 26 | 0.00370769573956302 | 0.942669143399898 | 0.905819671541046 | 0.981017681374158 | 0.605248533972379 | 0.87673863501873 |
| GCST90199714 | 3-hydroxy-2-ethylpropionate levels | GCST90032256 | CAG-170 sp003516765 abundance in stool | IVW | 26 | 0.0115220792673619 | 1.09163359426097 | 1.01985205378946 | 1.16846742592836 | 0.305817409031723 | 0.390457627660248 |
| GCST90199714 | 3-hydroxy-2-ethylpropionate levels | GCST90032281 | CAG-449 abundance in stool | IVW | 26 | 0.00281010864255258 | 1.07613457941477 | 1.02556204240109 | 1.12920095043776 | 0.454273681710893 | 0.70703208615208 |
| GCST90199714 | 3-hydroxy-2-ethylpropionate levels | GCST90032384 | Faecalicatena sp001517425 abundance in stool | IVW | 26 | 0.00695339684804534 | 0.96154295363699 | 0.93454657604931 | 0.989319179358015 | 0.963652489340891 | 0.253350007414298 |
| GCST90199714 | 3-hydroxy-2-ethylpropionate levels | GCST90032388 | Faecalicoccus pleomorphus abundance in stool | IVW | 26 | 0.00653435666875791 | 0.938011028014744 | 0.895733913660341 | 0.982283550124595 | 0.365215567219235 | 0.23434136012451 |
| GCST90199784 | Cysteine-glutathione disulfide levels | GCST90032290 | CAG-495 abundance in stool | IVW | 25 | 0.0102694363379853 | 0.864579599325407 | 0.773652867549209 | 0.966192868821928 | 0.594139238144338 | 0.302445168532901 |
| GCST90199787 | Homostachydrine levels | GCST90032511 | Photobacterium abundance in stool | IVW | 19 | 0.043474820231641 | 1.02680746943382 | 1.00077487961047 | 1.05351723026407 | 0.343379232391412 | 0.647480166458478 |
| GCST90199800 | Carnitine C5:1 levels | GCST90032455 | Lactobacillus B salivarius abundance in stool | IVW | 20 | 0.046585482860356 | 1.04640190210921 | 1.00068512751683 | 1.0942072692285 | 0.64719154477859 | 0.237661454064768 |
| GCST90199807 | Hexadecanedioate (C16-DC) levels | GCST90032264 | CAG-245 sp000435175 abundance in stool | IVW | 21 | 0.0258067691269809 | 0.93933142510256 | 0.889035548500561 | 0.992472716837204 | 0.0946898302741439 | 0.597808818098733 |
| GCST90199807 | Hexadecanedioate (C16-DC) levels | GCST90032265 | CAG-245 abundance in stool | IVW | 21 | 0.0400737864834602 | 0.937782121698543 | 0.881997807517066 | 0.997094664274893 | 0.129580984384988 | 0.550790068646684 |
| GCST90199807 | Hexadecanedioate (C16-DC) levels | GCST90032290 | CAG-495 abundance in stool | IVW | 21 | 0.0258327187163465 | 1.10727529832506 | 1.01236218973803 | 1.21108690023095 | 0.320361285350663 | 0.753015591039431 |
| GCST90199808 | Glycerophosphoethanolamine levels | GCST90032185 | Alistipes shahii abundance in stool | IVW | 17 | 0.042863193090681 | 1.08976663008298 | 1.00276480870626 | 1.18431689837083 | 0.4978163249263 | 0.667006091148828 |
| GCST90199808 | Glycerophosphoethanolamine levels | GCST90032380 | Faecalibacterium sp002160895 abundance in stool | IVW | 17 | 0.0412911874732624 | 0.970337901018134 | 0.942676046901179 | 0.998811463649062 | 0.8573491050187 | 0.481019818143087 |
| GCST90199879 | Ergothioneine levels | GCST90032505 | Pararhizobium abundance in stool | IVW | 19 | 0.00418329666959999 | 0.990712926229301 | 0.984407003380896 | 0.99705924361252 | 0.581228276156448 | 0.174185407897826 |
| GCST90199916 | Carnitine C18:2 levels | GCST90032533 | QALR01 sp003150035 abundance in stool | IVW | 23 | 0.0320744723539036 | 1.02900935511285 | 1.00245085345098 | 1.05627148629241 | 0.526409292533274 | 0.959456330961065 |
| GCST90199920 | Trimethylamine n-oxide levels | GCST90032572 | Syntrophomonadia abundance in stool | IVW | 14 | 0.0319771255991027 | 0.978103369439572 | 0.958511997673932 | 0.998095176305233 | 0.830127448315365 | 0.801520844427877 |
| GCST90199933 | 3b-hydroxy-5-cholenoic acid levels | GCST90032303 | CAG-83 sp002392625 abundance in stool | IVW | 25 | 0.0201167253056934 | 0.955990203355687 | 0.920385045077623 | 0.992972749611518 | 0.485985025092795 | 0.210503262401392 |
| GCST90199949 | 6-oxopiperidine-2-carboxylate levels | GCST90032511 | Photobacterium abundance in stool | IVW | 20 | 0.0110208680827014 | 1.0242096921658 | 1.00549215474828 | 1.04327566214475 | 0.852263927742424 | 0.596104775556545 |
| GCST90199949 | 6-oxopiperidine-2-carboxylate levels | GCST90032555 | Ruminococcus abundance in stool | IVW | 20 | 0.0068710317058834 | 0.964059375845337 | 0.938809004435468 | 0.989988885667092 | 0.202079342621535 | 0.221927849898756 |
| GCST90199949 | 6-oxopiperidine-2-carboxylate levels | GCST90032611 | UBA2658 sp002841545 abundance in stool | IVW | 20 | 0.0372653323467961 | 0.973919805773117 | 0.949999314773325 | 0.998442602354369 | 0.863556218383128 | 0.83769812496285 |
| GCST90200000 | Umbelliferone sulfate levels | GCST90032256 | CAG-170 sp003516765 abundance in stool | IVW | 19 | 0.00558755172611274 | 1.0872109164222 | 1.02477516553256 | 1.15345064609691 | 0.688259439057658 | 0.30183754880666 |
| GCST90200000 | Umbelliferone sulfate levels | GCST90032628 | UBA737 sp002451855 abundance in stool | IVW | 19 | 0.000436164660554515 | 1.06687225919417 | 1.02907338381426 | 1.10605952436481 | 0.439128645644951 | 0.971505027167087 |
| GCST90200083 | 1-(1-enyl-palmitoyl)-2-palmitoyl-GPC (P-16:0/16:0) levels | GCST90032281 | CAG-449 abundance in stool | IVW | 30 | 0.00158352133167288 | 0.947290614820716 | 0.915992512127418 | 0.979658127164454 | 0.787501102896934 | 0.145449101984993 |
| GCST90200083 | 1-(1-enyl-palmitoyl)-2-palmitoyl-GPC (P-16:0/16:0) levels | GCST90032388 | Faecalicoccus pleomorphus abundance in stool | IVW | 30 | 0.0227250757691532 | 1.03812302257182 | 1.00523691242351 | 1.0720849947655 | 0.671353187439971 | 0.26407039931909 |
| GCST90200083 | 1-(1-enyl-palmitoyl)-2-palmitoyl-GPC (P-16:0/16:0) levels | GCST90032393 | Fibrobacterales abundance in stool | IVW | 30 | 0.0192169847646197 | 1.01082911538928 | 1.00175564935117 | 1.01998476492793 | 0.949179270865765 | 0.369151210316739 |
| GCST90200162 | 3-hydroxyphenylacetoylglutamine levels | GCST90032290 | CAG-495 abundance in stool | IVW | 14 | 0.0427245999694876 | 1.13495035059536 | 1.00415614542111 | 1.28278087445887 | 0.37443598368307 | 0.568041680913713 |
| GCST90200162 | 3-hydroxyphenylacetoylglutamine levels | GCST90032533 | QALR01 sp003150035 abundance in stool | IVW | 14 | 0.000462021225368059 | 1.07880541809977 | 1.03396246760408 | 1.12559320728368 | 0.855408348596592 | 0.661502471795509 |
| GCST90200165 | Octadecenedioate (C18:1-DC) levels | GCST90032264 | CAG-245 sp000435175 abundance in stool | IVW | 17 | 0.00315870703181611 | 0.90911571512983 | 0.853380549647816 | 0.968491001859733 | 0.764609654615769 | 0.809956981277812 |
| GCST90200165 | Octadecenedioate (C18:1-DC) levels | GCST90032265 | CAG-245 abundance in stool | IVW | 17 | 0.00261155811556259 | 0.897376153961282 | 0.83628512484595 | 0.962929912028127 | 0.852534812311477 | 0.752297991011466 |
| GCST90200165 | Octadecenedioate (C18:1-DC) levels | GCST90032565 | Staphylococcus aureus abundance in stool | IVW | 17 | 0.0448370881069666 | 0.976021475295045 | 0.953150276863728 | 0.99944147671198 | 0.555171112968343 | 0.546226438802456 |
| GCST90200189 | Glucuronide of piperine metabolite C17H21NO3 (3) levels | GCST90032455 | Lactobacillus B salivarius abundance in stool | IVW | 14 | 0.0292988031171982 | 0.978296133091594 | 0.95918017016074 | 0.997793067241559 | 0.115920353037169 | 0.294327716327003 |
| GCST90200189 | Glucuronide of piperine metabolite C17H21NO3 (3) levels | GCST90032628 | UBA737 sp002451855 abundance in stool | IVW | 14 | 0.0379918320399431 | 0.976986110617816 | 0.955733741196648 | 0.998711062711904 | 0.106743963456763 | 0.254104363342464 |
| GCST90200195 | N-acetyl-isoputreanine levels | GCST90032252 | CAG-110 abundance in stool | IVW | 29 | 0.00297252387182939 | 0.927734455154456 | 0.882936768039175 | 0.974805048828307 | 0.689648026143739 | 0.982189971378986 |
| GCST90200195 | N-acetyl-isoputreanine levels | GCST90032256 | CAG-170 sp003516765 abundance in stool | IVW | 29 | 0.00405391424161715 | 0.9226836185708 | 0.873411932120632 | 0.974734862977945 | 0.357022599818693 | 0.664502578855896 |
| GCST90200195 | N-acetyl-isoputreanine levels | GCST90032303 | CAG-83 sp002392625 abundance in stool | IVW | 29 | 0.00761491275026761 | 0.95602869285754 | 0.924970552558282 | 0.988129685900791 | 0.505102757401388 | 0.285362415024603 |
| GCST90200195 | N-acetyl-isoputreanine levels | GCST90032628 | UBA737 sp002451855 abundance in stool | IVW | 29 | 0.034759891758292 | 0.964588706434932 | 0.932836104086231 | 0.997422128609857 | 0.821868596581901 | 0.935163937958044 |
| GCST90200265 | Bilirubin degradation product, C16H18N2O5 (4) levels | GCST90032189 | An181 abundance in stool | IVW | 15 | 0.0107082505119057 | 1.0403600328742 | 1.0092217048464 | 1.07245909675192 | 0.821803719924324 | 0.983965285522165 |
| GCST90200265 | Bilirubin degradation product, C16H18N2O5 (4) levels | GCST90032245 | Brevibacillaceae abundance in stool | IVW | 15 | 0.0374315595181124 | 1.01501000794104 | 1.00086682185036 | 1.02935305050455 | 0.13539795568335 | 0.111205932622969 |
| GCST90200265 | Bilirubin degradation product, C16H18N2O5 (4) levels | GCST90032265 | CAG-245 abundance in stool | IVW | 15 | 0.0346515462659323 | 0.934932925692619 | 0.878352935535684 | 0.99515757297614 | 0.935546574947417 | 0.123906354364447 |
| GCST90200265 | Bilirubin degradation product, C16H18N2O5 (4) levels | GCST90032380 | Faecalibacterium sp002160895 abundance in stool | IVW | 15 | 0.0343277894262651 | 1.02184229394486 | 1.00159613236703 | 1.04249770935803 | 0.134928967468679 | 0.195935498587614 |
| GCST90200265 | Bilirubin degradation product, C16H18N2O5 (4) levels | GCST90032511 | Photobacterium abundance in stool | IVW | 15 | 0.0398737028914575 | 0.984947165453182 | 0.970801745987783 | 0.99929869589096 | 0.762599449402498 | 0.510285035934989 |
| GCST90200277 | Bilirubin degradation product, C16H18N2O5 (1) levels | GCST90032189 | An181 abundance in stool | IVW | 20 | 0.0450958052093012 | 1.02854710140496 | 1.00061489080969 | 1.05725904094081 | 0.692672201856099 | 0.764942702705686 |
| GCST90200277 | Bilirubin degradation product, C16H18N2O5 (1) levels | GCST90032264 | CAG-245 sp000435175 abundance in stool | IVW | 20 | 0.00441226325040637 | 0.928922758799377 | 0.882949679866211 | 0.977289546043209 | 0.268122217741601 | 0.308133414760588 |
| GCST90200277 | Bilirubin degradation product, C16H18N2O5 (1) levels | GCST90032265 | CAG-245 abundance in stool | IVW | 20 | 0.00308751476998023 | 0.918154560745833 | 0.86766246240062 | 0.971584958378822 | 0.277572962350395 | 0.253856596667514 |
| GCST90200277 | Bilirubin degradation product, C16H18N2O5 (1) levels | GCST90032380 | Faecalibacterium sp002160895 abundance in stool | IVW | 20 | 0.00243181075636314 | 1.02844375432291 | 1.00996377688924 | 1.04726187216692 | 0.906824148256646 | 0.364027459926416 |
| GCST90200277 | Bilirubin degradation product, C16H18N2O5 (1) levels | GCST90032505 | Pararhizobium abundance in stool | IVW | 20 | 0.0231674580152556 | 1.01336596767117 | 1.00181820983733 | 1.02504683419646 | 0.800348856156228 | 0.512335630691585 |
| GCST90200280 | 5-oxoproline levels | GCST90032393 | Fibrobacterales abundance in stool | IVW | 19 | 0.0462115664303859 | 0.989779462545994 | 0.979832304391744 | 0.999827603240728 | 0.707511257996129 | 0.298306614256335 |
| GCST90200280 | 5-oxoproline levels | GCST90032511 | Photobacterium abundance in stool | IVW | 19 | 0.0109938238641447 | 0.980927440543141 | 0.966475396163977 | 0.995595591392853 | 0.970067944340842 | 0.190007743578961 |
| GCST90200280 | 5-oxoproline levels | GCST90032533 | QALR01 sp003150035 abundance in stool | IVW | 19 | 0.00937716429023953 | 1.04396163403103 | 1.0106211092541 | 1.07840206715366 | 0.0536630356187212 | 0.916214916407671 |
| GCST90200280 | 5-oxoproline levels | GCST90032555 | Ruminococcus abundance in stool | IVW | 19 | 0.00402588745348569 | 1.03183660332067 | 1.01003275896818 | 1.05411113302897 | 0.866535425791153 | 0.391682962690036 |
| GCST90200282 | Picolinate levels | GCST90032419 | Gluconobacter abundance in stool | IVW | 20 | 0.00546272223937797 | 1.0323650195135 | 1.00942650925772 | 1.05582479134496 | 0.577678662808919 | 0.845026853047188 |
| GCST90200287 | N-acetylvaline levels | GCST90032611 | UBA2658 sp002841545 abundance in stool | IVW | 17 | 0.0384837925434023 | 1.03157238589901 | 1.00164840190898 | 1.06239034108306 | 0.629861903557799 | 0.887469444083791 |
| GCST90200288 | N-acetylleucine levels | GCST90032388 | Faecalicoccus pleomorphus abundance in stool | IVW | 16 | 0.0339921163249878 | 0.964067571630184 | 0.93199917983098 | 0.99723937829803 | 0.0837123341976069 | 0.181253852640947 |
| GCST90200288 | N-acetylleucine levels | GCST90032565 | Staphylococcus aureus abundance in stool | IVW | 16 | 0.0295516020137451 | 1.02269414005893 | 1.00223048389801 | 1.04357562548188 | 0.775872481761241 | 0.484282635019861 |
| GCST90200305 | 2-aminobutyrate levels | GCST90032245 | Brevibacillaceae abundance in stool | IVW | 16 | 0.0428536891120926 | 0.977336784913563 | 0.955891701338175 | 0.999262981159886 | 0.903669552927964 | 0.394704354162639 |
| GCST90200305 | 2-aminobutyrate levels | GCST90032384 | Faecalicatena sp001517425 abundance in stool | IVW | 16 | 0.0476389043134517 | 0.965922335236589 | 0.933342080187362 | 0.999639872148068 | 0.240810560597155 | 0.893692199246249 |
| GCST90200305 | 2-aminobutyrate levels | GCST90032393 | Fibrobacterales abundance in stool | IVW | 16 | 0.0259536814586527 | 0.98247040263955 | 0.967296232011325 | 0.997882613535724 | 0.42625681727584 | 0.975583652295677 |
| GCST90200305 | 2-aminobutyrate levels | GCST90032505 | Pararhizobium abundance in stool | IVW | 16 | 0.0228245372534286 | 1.02350191325834 | 1.00323362518552 | 1.04417968072966 | 0.199673635289562 | 0.83789584825944 |
| GCST90200308 | 3-hydroxyisobutyrate levels | GCST90032187 | Alloprevotella abundance in stool | IVW | 14 | 0.0447834776226066 | 0.916765097835449 | 0.842159112947761 | 0.997980347997937 | 0.605164562661944 | 0.809324565048023 |
| GCST90200308 | 3-hydroxyisobutyrate levels | GCST90032611 | UBA2658 sp002841545 abundance in stool | IVW | 14 | 0.00170223124538982 | 1.06444168058071 | 1.02371815691495 | 1.10678518662985 | 0.831206353625288 | 0.615451857755849 |
| GCST90200340 | 1-palmitoyl-2-oleoyl-gpc (16:0/18:1) levels | GCST90032303 | CAG-83 sp002392625 abundance in stool | IVW | 20 | 0.0446340836058739 | 0.956188263110841 | 0.915277390784174 | 0.998927760826249 | 0.640957201610943 | 0.0546694461950252 |
| GCST90200393 | Phosphate levels (UKB data field 30810) | GCST90032265 | CAG-245 abundance in stool | IVW | 23 | 0.0406555609612796 | 0.915858251743386 | 0.841936484718193 | 0.996270327407425 | 0.659557762491076 | 0.166886512198586 |
| GCST90200393 | Phosphate levels (UKB data field 30810) | GCST90032555 | Ruminococcus abundance in stool | IVW | 23 | 0.0292930994223306 | 1.03169533916371 | 1.00314772642223 | 1.0610553608573 | 0.550164634753327 | 0.685684331109871 |
| GCST90200393 | Phosphate levels (UKB data field 30810) | GCST90032565 | Staphylococcus aureus abundance in stool | IVW | 22 | 0.0085934117548545 | 0.962424038602606 | 0.935319693713557 | 0.99031383205732 | 0.70722549010809 | 0.259093433465046 |
| GCST90200434 | 12,13-DiHOME levels | GCST90032195 | Atopobiaceae abundance in stool | IVW | 25 | 0.0385874667593127 | 0.964997231758781 | 0.932962561166098 | 0.998131860873593 | 0.786565127574945 | 0.194944539143148 |
| GCST90200434 | 12,13-DiHOME levels | GCST90032256 | CAG-170 sp003516765 abundance in stool | IVW | 25 | 0.0155465658717172 | 0.909572575116671 | 0.842346182011818 | 0.982164206441153 | 0.236940385186997 | 0.245027035315389 |
| GCST90200467 | X-11852 levels | GCST90032195 | Atopobiaceae abundance in stool | IVW | 22 | 0.00130304302911289 | 0.95051254297108 | 0.921555120820651 | 0.980379875205728 | 0.102658764624381 | 0.459291084602331 |
| GCST90200477 | X-12127 levels | GCST90032533 | QALR01 sp003150035 abundance in stool | IVW | 27 | 0.0405255861685362 | 0.959177741792143 | 0.921677379927238 | 0.998203883903613 | 0.657731114329403 | 0.737158154712879 |
| GCST90200481 | X-12104 levels | GCST90032195 | Atopobiaceae abundance in stool | IVW | 12 | 0.0127868007885068 | 1.06163540109509 | 1.01280548754187 | 1.11281952825293 | 0.659776381069118 | 0.602343145715221 |
| GCST90200481 | X-12104 levels | GCST90032264 | CAG-245 sp000435175 abundance in stool | IVW | 12 | 0.00766319544782792 | 1.17055190963463 | 1.04260911282899 | 1.31419508643218 | 0.391574650775446 | 0.148594693870382 |
| GCST90200481 | X-12104 levels | GCST90032265 | CAG-245 abundance in stool | IVW | 12 | 0.0175654216814996 | 1.16916036661575 | 1.02766587268394 | 1.33013657376311 | 0.321313911478186 | 0.235266199695617 |
| GCST90200481 | X-12104 levels | GCST90032380 | Faecalibacterium sp002160895 abundance in stool | IVW | 12 | 0.02822366366963 | 1.04737143757641 | 1.00495165682308 | 1.09158178983329 | 0.153487179592375 | 0.257150879001245 |
| GCST90200482 | X-12193 levels | GCST90032264 | CAG-245 sp000435175 abundance in stool | IVW | 19 | 0.0335815175497694 | 0.902551547147905 | 0.821112526087179 | 0.992067797505003 | 0.621096302140888 | 0.322008261152425 |
| GCST90200515 | X-12849 levels | GCST90032511 | Photobacterium abundance in stool | IVW | 19 | 0.00995101038763307 | 1.02923708477292 | 1.00692810008211 | 1.0520403359341 | 0.908603129954351 | 0.950172590532126 |
| GCST90200515 | X-12849 levels | GCST90032565 | Staphylococcus aureus abundance in stool | IVW | 19 | 0.0215657163798995 | 1.03799361258402 | 1.00549883224127 | 1.07153852915336 | 0.286391262415177 | 0.594518083288277 |
| GCST90200554 | X-17346 levels | GCST90032281 | CAG-449 abundance in stool | IVW | 24 | 0.0114568449602527 | 0.941034959202793 | 0.897729472547186 | 0.986429455110995 | 0.276278860933042 | 0.499777778878663 |
| GCST90200565 | X-21258 levels | GCST90032195 | Atopobiaceae abundance in stool | IVW | 19 | 0.0118188086675295 | 1.04597628312283 | 1.01000415366692 | 1.08322958958469 | 0.338160878995365 | 0.357183715765457 |
| GCST90200565 | X-21258 levels | GCST90032281 | CAG-449 abundance in stool | IVW | 20 | 0.00980006029506092 | 0.93471770835538 | 0.88803669580144 | 0.983852580016002 | 0.883222550740311 | 0.835229197208107 |
| GCST90200597 | X-22834 levels | GCST90032384 | Faecalicatena sp001517425 abundance in stool | IVW | 20 | 0.0263607362277907 | 1.03792412092424 | 1.00438164688543 | 1.07258678425377 | 0.517054465860615 | 0.799665135284978 |
| GCST90200609 | X-23587 levels | GCST90032185 | Alistipes shahii abundance in stool | IVW | 17 | 0.000641883020754833 | 0.851865973468661 | 0.776941658867267 | 0.934015609114976 | 0.605801499838897 | 0.904870609574291 |
| GCST90200609 | X-23587 levels | GCST90032382 | Faecalicatena lactaris abundance in stool | IVW | 17 | 0.00432606563194608 | 1.13041977228806 | 1.0391273106389 | 1.22973272716132 | 0.310661266545285 | 0.701956886213503 |
| GCST90200678 | N-acetylasparagine levels | GCST90032511 | Photobacterium abundance in stool | IVW | 19 | 0.0488555151420951 | 0.988864596509048 | 0.977907947645834 | 0.999944005550867 | 0.833350454964666 | 0.281837189288175 |
| GCST90200679 | N-acetylarginine levels | GCST90032252 | CAG-110 abundance in stool | IVW | 21 | 0.0113125418537287 | 1.05007202170104 | 1.01111222583617 | 1.09053300176195 | 0.561066052836522 | 0.183729132010595 |
| GCST90200686 | Bilirubin (E,E) levels | GCST90032252 | CAG-110 abundance in stool | IVW | 29 | 0.0224484530204094 | 1.04772136768949 | 1.00661187463473 | 1.09050975055452 | 0.25166628661858 | 0.508097157213313 |
| GCST90200686 | Bilirubin (E,E) levels | GCST90032380 | Faecalibacterium sp002160895 abundance in stool | IVW | 29 | 0.0415986715440818 | 1.01797363925911 | 1.00067792671098 | 1.03556829082105 | 0.10319609430615 | 0.323935261729297 |
| GCST90200687 | Bilirubin (E,Z or Z,E) levels | GCST90032380 | Faecalibacterium sp002160895 abundance in stool | IVW | 17 | 0.034566179624772 | 1.02019044929417 | 1.00145200508907 | 1.03927951368819 | 0.231902343212989 | 0.127501903813756 |
| GCST90200691 | N-delta-acetylornithine levels | GCST90032252 | CAG-110 abundance in stool | IVW | 17 | 0.0471235604831089 | 0.958912241940119 | 0.920002304516442 | 0.999467809187637 | 0.459619148434163 | 0.762485344694052 |
| GCST90200704 | Bilirubin (z,z) levels | GCST90032380 | Faecalibacterium sp002160895 abundance in stool | IVW | 25 | 0.0116976740948767 | 1.02253077983747 | 1.00497139189539 | 1.04039697462739 | 0.0514979490268261 | 0.437885211591725 |
| GCST90200713 | Spermidine to ornithine ratio | GCST90032628 | UBA737 sp002451855 abundance in stool | IVW | 13 | 0.000462046286871564 | 0.914567157551708 | 0.869977035852483 | 0.961442717683459 | 0.757261136247743 | 0.377067773492167 |
| GCST90200763 | Phosphate to N-acetylneuraminate ratio | GCST90032264 | CAG-245 sp000435175 abundance in stool | IVW | 23 | 0.0429221590510157 | 0.920331440298008 | 0.849252175640639 | 0.997359776396285 | 0.80149690565593 | 0.951568788353067 |
| GCST90200763 | Phosphate to N-acetylneuraminate ratio | GCST90032281 | CAG-449 abundance in stool | IVW | 23 | 0.0362367941600168 | 0.945318496241207 | 0.896854443283012 | 0.996401440644636 | 0.128652182580544 | 0.299913056339083 |
| GCST90200763 | Phosphate to N-acetylneuraminate ratio | GCST90032419 | Gluconobacter abundance in stool | IVW | 23 | 0.0151720103908614 | 1.03050722319697 | 1.00581168191975 | 1.05580911034385 | 0.84682009203304 | 0.479223277595721 |
| GCST90200782 | Mannose to trans-4-hydroxyproline ratio | GCST90032388 | Faecalicoccus pleomorphus abundance in stool | IVW | 17 | 0.0429350952736898 | 1.05992981426199 | 1.0018516029583 | 1.12137487013456 | 0.0958323819752856 | 0.581735972865359 |
| GCST90200785 | Cysteine to 5-oxoproline ratio | GCST90032382 | Faecalicatena lactaris abundance in stool | IVW | 17 | 0.0412573935251851 | 1.06676312417789 | 1.00256617021532 | 1.13507077828225 | 0.324034847216107 | 0.981348450070904 |
| GCST90200785 | Cysteine to 5-oxoproline ratio | GCST90032555 | Ruminococcus abundance in stool | IVW | 17 | 0.00389099631183715 | 0.964505806663369 | 0.941128288812453 | 0.98846401935405 | 0.922425600289791 | 0.950105956960142 |
| GCST90200798 | Dopamine 4-sulfate to dopamine 3-O-sulfate ratio | GCST90032382 | Faecalicatena lactaris abundance in stool | IVW | 19 | 0.0455719400957226 | 0.92505080434077 | 0.857031643730777 | 0.998468372633759 | 0.521905419553449 | 0.657123549450549 |
| GCST90200798 | Dopamine 4-sulfate to dopamine 3-O-sulfate ratio | GCST90032644 | Victivallis sp002998355 abundance in stool | IVW | 19 | 0.0348910809882006 | 1.10252482612711 | 1.00694628373992 | 1.20717560793003 | 0.533384398661318 | 0.676934803021396 |
| GCST90200811 | Choline to taurocholate ratio | GCST90032290 | CAG-495 abundance in stool | IVW | 21 | 0.0420478589317413 | 1.13815347395736 | 1.00466035092685 | 1.28938434674579 | 0.756633408229331 | 0.123580236572965 |
| GCST90200869 | Adenosine 5'-monophosphate (AMP) to valine ratio | GCST90032256 | CAG-170 sp003516765 abundance in stool | IVW | 17 | 0.0385932239585131 | 1.11376688406576 | 1.00566764806351 | 1.2334857091507 | 0.756677983423371 | 0.21767182989842 |
| GCST90200869 | Adenosine 5'-monophosphate (AMP) to valine ratio | GCST90032264 | CAG-245 sp000435175 abundance in stool | IVW | 17 | 0.0069030909236546 | 1.16426576830529 | 1.04262829443501 | 1.30009398985478 | 0.707597558629513 | 0.829010708002381 |
| GCST90200869 | Adenosine 5'-monophosphate (AMP) to valine ratio | GCST90032265 | CAG-245 abundance in stool | IVW | 17 | 0.00393827533544273 | 1.19828065989826 | 1.05962430017185 | 1.35508079576255 | 0.583502930361674 | 0.830513791150354 |
| GCST90200869 | Adenosine 5'-monophosphate (AMP) to valine ratio | GCST90032388 | Faecalicoccus pleomorphus abundance in stool | IVW | 17 | 0.000239554275712552 | 0.878331691771089 | 0.819586622033496 | 0.941287400293772 | 0.713145520665907 | 0.631317816575631 |
| GCST90200869 | Adenosine 5'-monophosphate (AMP) to valine ratio | GCST90032511 | Photobacterium abundance in stool | IVW | 17 | 0.024904421406481 | 0.956602474067167 | 0.92022330275628 | 0.994419822504521 | 0.189257845562962 | 0.0200359550955621 |
| GCST90200869 | Adenosine 5'-monophosphate (AMP) to valine ratio | GCST90032644 | Victivallis sp002998355 abundance in stool | IVW | 17 | 0.0117075990430982 | 1.17159307487562 | 1.03586103995097 | 1.32511049277564 | 0.932155460206043 | 0.39314668570422 |
| GCST90200872 | Phosphate to cysteine ratio | GCST90032187 | Alloprevotella abundance in stool | IVW | 23 | 0.0395052944975111 | 0.938982409342518 | 0.884358036927388 | 0.996980779547179 | 0.937400381456273 | 0.170274133870619 |
| GCST90200894 | Inosine to theophylline ratio | GCST90032290 | CAG-495 abundance in stool | IVW | 15 | 0.0447929105799064 | 0.877127806195937 | 0.771698867877874 | 0.996960369422044 | 0.910549051709619 | 0.246368565519711 |
| GCST90200968 | Phosphate to 5-oxoproline ratio | GCST90032303 | CAG-83 sp002392625 abundance in stool | IVW | 21 | 0.0341486068311039 | 1.03690051838026 | 1.00271177495655 | 1.07225497084029 | 0.441386069604466 | 0.629592404850379 |
| GCST90200968 | Phosphate to 5-oxoproline ratio | GCST90032455 | Lactobacillus B salivarius abundance in stool | IVW | 21 | 0.0423727151935417 | 1.03208515977918 | 1.00108720672541 | 1.06404294239331 | 0.505404098128219 | 0.332199192402201 |
| GCST90200968 | Phosphate to 5-oxoproline ratio | GCST90032511 | Photobacterium abundance in stool | IVW | 21 | 0.0144116664298581 | 1.01960203551302 | 1.0038698606971 | 1.03558075754997 | 0.856339862478263 | 0.426596181242681 |
| GCST90200978 | Caffeine to paraxanthine ratio | GCST90032185 | Alistipes shahii abundance in stool | IVW | 23 | 0.0115553767339579 | 1.09425026642879 | 1.02037102550053 | 1.17347868143561 | 0.823588282760183 | 0.995965487791345 |
| GCST90200978 | Caffeine to paraxanthine ratio | GCST90032419 | Gluconobacter abundance in stool | IVW | 23 | 0.0235875250042084 | 0.976568772374496 | 0.956725755838411 | 0.996823343949052 | 0.576278528401091 | 0.0936805243830739 |
| GCST90201018 | Bilirubin (Z,Z) to glucuronate ratio | GCST90032252 | CAG-110 abundance in stool | IVW | 16 | 0.0224810577386765 | 1.0599576016495 | 1.00825329618973 | 1.11431335909378 | 0.671195504283306 | 0.320850461904608 |
| GCST90201018 | Bilirubin (Z,Z) to glucuronate ratio | GCST90032380 | Faecalibacterium sp002160895 abundance in stool | IVW | 16 | 0.0164066598190967 | 1.02655941436089 | 1.00481493412837 | 1.04877445131438 | 0.246427474856466 | 0.571857719906412 |
| GCST90201018 | Bilirubin (Z,Z) to glucuronate ratio | GCST90032505 | Pararhizobium abundance in stool | IVW | 16 | 0.00566443170519687 | 1.01928458886505 | 1.00558441248588 | 1.03317141773255 | 0.82660781157432 | 0.774387926991871 |
| GCST90201018 | Bilirubin (Z,Z) to glucuronate ratio | GCST90032555 | Ruminococcus abundance in stool | IVW | 16 | 0.0390751290334383 | 0.976827384671127 | 0.95531340539638 | 0.998825865996844 | 0.752740077078077 | 0.143020354885556 |
| GCST90201018 | Bilirubin (Z,Z) to glucuronate ratio | GCST90032572 | Syntrophomonadia abundance in stool | IVW | 16 | 0.039925060573172 | 1.01116625317326 | 1.00051101442265 | 1.02193496804876 | 0.930637895731038 | 0.528907510277482 |

**Abbreviations:** IVW, Inverse Variance Weighted; SNP, single nucleotide polymorphisms; or, odds ratio; or_lci95, lower 95% confidence interval of the odds ratio; or_uci95, upper 95% confidence interval of the odds ratio; pleio_*P*, *P*-value for horizontal pleiotropy test; lheter_*P*, *P*-value for likelihood-based heterogeneity test

**Table S3** The expression differences of pathway genes between RPL and controls

| **Symbol** | ***P*_wilcox** | **Trend** | **FC** |
| --- | --- | --- | --- |
| G6PD | 0.00676255383690067 | up | 1.04037701775696 |
| GCLM | 0.0033935372788444 | up | 1.02667429821234 |
| GPX6 | 0.0482796869790336 | down | 0.93608772821633 |
| GPX7 | 0.0302666613325909 | down | 0.965291571193338 |
| GSTA3 | 0.0172422873137515 | up | 1.07414602273745 |
| GSTO1 | 4.22557884111595e-05 | down | 0.959159955958471 |
| GSTO2 | 0.00823002368920477 | up | 1.02899611555953 |
| GSTP1 | 0.0482796869790336 | up | 1.0050309953413 |
| LAP3 | 2.26069137200106e-05 | down | 0.958222434862922 |
| OPLAH | 0.0106161635229787 | up | 1.03750268673329 |
| PGD | 0.0112993840580768 | down | 0.964785439979856 |
| SMS | 0.0436576356607178 | up | 1.02933865149025 |
| SRM | 0.00315781141143728 | down | 0.955146498071244 |
| ALDH9A1 | 0.00676255383690067 | down | 0.983893952034436 |
| ASH1L | 0.000172331536402266 | up | 1.05204325837027 |
| DOT1L | 0.0243038774622728 | up | 1.01937411515137 |
| EHHADH | 1.43577738225134e-07 | down | 0.894803253023438 |
| PLOD3 | 0.0459206839409298 | up | 1.01750878979324 |
| SETD1A | 0.000142314526905611 | up | 1.0325385598393 |
| SETDB1 | 7.76212274436937e-06 | up | 1.02698205438881 |

**Abbreviations:** FC, fold change

**Table S4** Gene set enrichment analysis (GSEA) of biomarkers

| **Gene** | **Terms** | **setSize** | **enrichmentScore** | **NES** | ***P* value** | ***P*adj** | **q value** | **rank** | **core_enrichment** |
| --- | --- | --- | --- | --- | --- | --- | --- | --- | --- |
| ASH1L | KEGG_SYSTEMIC_LUPUS_ERYTHEMATOSUS | 53 | -0.545904438 | -2.133865276 | 2.24E-06 | 2.24E-06 | 0.000292357 | 3973 | HLA-DOA/SNRPD3/C1QB/HLA-DRB1/HLA-DRB5/FCGR3A/HLA-DPB1/C1R/ACTN4/C1QA/C1QC/C3/HLA-DQB1/HLA-DPA1/C1S/ACTN2/C8A/FCGR2C/FCGR2A/CD28/C4A/HLA-DRA/C4B/CD40/SNRPB/C2/IL10/C8B |
| ASH1L | KEGG_RIBOSOME | 87 | -0.426460377 | -1.856444225 | 5.91E-05 | 5.91E-05 | 0.003215287 | 4370 | RPS2/RPS26/RPL21/RPS10/RPS8/RPL26L1/RPS15A/RPL3/RPL18A/RPS25/RPL5/RPS20/RPS3A/RPL37A/RPL31/RPS24/RPL35/RPL26/RPS12/RPL22L1/RPL15/RPL18/RPL3L/RPL23A/RPS19/RPL22/RPL41/RPS4X/RPL13A/RPL11/RPS27L/RPSA/RPS23/RPL29/RPL17/RPL30/RPL4/RSL24D1/RPS9/RPL7/RPS16/RPLP0/RPS3 |
| ASH1L | KEGG_GRAFT_VERSUS_HOST_DISEASE | 35 | -0.563589331 | -2.020011592 | 7.39E-05 | 7.39E-05 | 0.003215287 | 4311 | FASLG/HLA-E/HLA-DOA/KLRD1/HLA-DRB1/HLA-DRB5/HLA-DPB1/KIR3DL1/KLRC1/GZMB/HLA-DQB1/HLA-DPA1/HLA-G/IL1B/CD28/HLA-DRA/HLA-B/PRF1/HLA-F/HLA-A |
| ASH1L | KEGG_COMPLEMENT_AND_COAGULATION_CASCADES | 69 | -0.440762256 | -1.833839013 | 0.000176327 | 0.000176327 | 0.00470337 | 4877 | CD59/PROC/PLAU/SERPINF2/F2/CR2/C4BPA/C5AR1/TFPI/KNG1/C1QB/FGB/FGG/C1R/SERPINC1/C4BPB/C1QA/F2R/PLAT/SERPING1/BDKRB1/C1QC/F13A1/BDKRB2/SERPINE1/PLAUR/C3/C1S/CFI/C8A/PROS1/THBD/C4A/C4B/PLG/C2/C8B/CD55/A2M/CFB |
| ASH1L | KEGG_PROTEIN_EXPORT | 22 | -0.630050666 | -2.000425229 | 0.000180169 | 0.000180169 | 0.00470337 | 1117 | SRP9/SEC61B/SEC61A2/SEC11A/OXA1L/SEC63/SRP19/SRP54/SPCS2/SRPRB/SRP68 |
| ASH1L | KEGG_RENAL_CELL_CARCINOMA | 66 | -0.434938058 | -1.783718286 | 0.000616513 | 0.000616513 | 0.013411862 | 2912 | PAK1/PIK3R1/TGFB2/RAPGEF1/PIK3R5/VEGFA/TGFB3/CRK/CUL2/PTPN11/MAP2K1/PIK3CD/VEGFB/MET/TGFA/MAPK3/KRAS/EPAS1/CRKL/MAP2K2/RAP1B/GRB2/HRAS/EGLN2/RAC1 |
| ASH1L | KEGG_ALLOGRAFT_REJECTION | 35 | -0.521820871 | -1.870305469 | 0.000756519 | 0.000756519 | 0.014106527 | 4311 | FASLG/HLA-E/HLA-DOA/HLA-DRB1/HLA-DRB5/HLA-DPB1/IL12B/GZMB/HLA-DQB1/HLA-DPA1/HLA-G/CD28/HLA-DRA/HLA-B/PRF1/CD40/IL10/HLA-F/HLA-A |
| ASH1L | KEGG_THYROID_CANCER | 29 | -0.52821627 | -1.806373714 | 0.001684995 | 0.001684995 | 0.027492028 | 1777 | TP53/MYC/NTRK1/MAP2K1/RET/CDH1/TFG/MAPK3/KRAS/MAP2K2/HRAS/TPM3 |
| ASH1L | KEGG_PRION_DISEASES | 35 | -0.484566583 | -1.736779 | 0.00281517 | 0.00281517 | 0.040828195 | 2777 | C1QA/EGR1/C1QC/NCAM2/PRKACG/STIP1/C8A/IL1B/MAP2K1/PRNP/C8B/NOTCH1/MAPK3/BAX/MAP2K2 |
| ASH1L | KEGG_TYPE_I_DIABETES_MELLITUS | 41 | -0.461250563 | -1.724267787 | 0.00394441 | 0.00394441 | 0.048611991 | 4311 | FASLG/PTPRN/HLA-E/HLA-DOA/HLA-DRB1/HLA-DRB5/HLA-DPB1/INS/IL12B/GZMB/HLA-DQB1/HLA-DPA1/HLA-G/IL1B/CD28/HLA-DRA/HLA-B/PRF1/HLA-F/HLA-A |
| ASH1L | KEGG_VIRAL_MYOCARDITIS | 68 | -0.383011057 | -1.592392049 | 0.004149526 | 0.004149526 | 0.048611991 | 3973 | HLA-DOA/ITGB2/HLA-DRB1/ITGAL/HLA-DRB5/HLA-DPB1/ICAM1/CCND1/RAC2/HLA-DQB1/EIF4G2/HLA-DPA1/HLA-G/EIF4G1/CD28/HLA-DRA/HLA-B/PRF1/CD40/CAV1/CD55/HLA-F/HLA-A/RAC1/CYCS/DAG1 |
| ASH1L | KEGG_LEISHMANIA_INFECTION | 68 | -0.380073257 | -1.580177966 | 0.005052812 | 0.005052812 | 0.048611991 | 3332 | HLA-DOA/ITGB2/HLA-DRB1/NCF2/HLA-DRB5/FCGR3A/HLA-DPB1/IL12B/PRKCB/TGFB2/CYBA/C3/NOS2/HLA-DQB1/HLA-DPA1/TGFB3/NFKB1/ITGAM/FCGR2C/IL1B/MYD88/FCGR2A/FOS/MAPK14/HLA-DRA/MAPK12/IL10/MAPK3/NCF4/IFNGR2/RELA |
| ASH1L | KEGG_PENTOSE_PHOSPHATE_PATHWAY | 26 | -0.50781526 | -1.688441681 | 0.005385214 | 0.005385214 | 0.048611991 | 5202 | G6PD/TKTL1/PFKP/DERA/TKT/PRPS2/ALDOB/ALDOA/H6PD/PGM2/RPE/PGD/PRPS1/PFKL/RBKS/PRPS1L1 |
| ASH1L | KEGG_PROTEASOME | 43 | -0.441961566 | -1.6640784 | 0.005433844 | 0.005433844 | 0.048611991 | 3886 | PSMD12/PSMB10/PSMB2/PSMB5/PSMB6/PSMD3/PSMD4/PSMD13/PSMB7/PSME2/PSMD8/POMP/PSMB8/PSMA3/PSMC6/PSMD1/PSMD14/PSMC3/PSMA7/PSMF1/PSMC5 |
| ASH1L | KEGG_ANTIGEN_PROCESSING_AND_PRESENTATION | 73 | -0.372559132 | -1.569820503 | 0.005586459 | 0.005586459 | 0.048611991 | 4051 | CD74/HLA-DOA/HSP90AB1/KLRD1/HLA-DRB1/HSPA8/HLA-DRB5/KLRC4/HLA-DPB1/KIR3DL1/CREB1/PSME2/KLRC1/IFI30/KIR2DS4/KIR2DL4/KIR3DL3/HSPA6/HLA-DQB1/HLA-DPA1/KLRC3/HLA-G/TAPBP/HLA-DRA/HLA-B/CTSS/B2M/HLA-F/RFXAP/HLA-A/LGMN |
| ASH1L | KEGG_FRUCTOSE_AND_MANNOSE_METABOLISM | 32 | -0.463215274 | -1.622068322 | 0.007673235 | 0.007673235 | 0.062597444 | 4611 | PFKFB3/PFKP/MPI/ALDOB/ALDOA/HK3/AKR1B1/MTMR6/AKR1B10/PFKL/PMM2/GMPPA/MTMR2/GMPPB/MTMR7/HK1 |
| ASH1L | KEGG_HISTIDINE_METABOLISM | 27 | -0.48371249 | -1.628596795 | 0.009195063 | 0.009195063 | 0.070599867 | 4172 | HAL/ALDH9A1/CNDP1/MAOB/LCMT1/HNMT/ALDH2/ALDH3B1/ALDH1B1/TRMT11/METTL6/LCMT2/AMDHD1 |
| ASH1L | KEGG_VEGF_SIGNALING_PATHWAY | 74 | -0.346512036 | -1.465837325 | 0.013961909 | 0.013961909 | 0.098069113 | 2863 | PIK3R1/PRKCB/MAPKAPK3/PLA2G5/PLA2G1B/RAC2/SH2D2A/PLCG2/PLA2G2A/PIK3R5/VEGFA/SRC/NOS3/MAPK14/MAP2K1/PIK3CD/MAPK12/MAPK3/HSPB1/KRAS/KDR/MAP2K2/HRAS/RAC1/NFATC3 |
| ASH1L | KEGG_GLIOMA | 65 | -0.356795045 | -1.45839766 | 0.015407732 | 0.015407732 | 0.098069113 | 3283 | SHC1/CDKN1A/PDGFA/PTEN/PIK3R1/PRKCB/CCND1/CALM3/PLCG2/CALML3/PIK3R5/TP53/MAP2K1/EGF/PIK3CD/TGFA/MAPK3/KRAS/MAP2K2/GRB2/HRAS/CALM1 |
| ASH1L | KEGG_HEMATOPOIETIC_CELL_LINEAGE | 84 | -0.347336817 | -1.499359598 | 0.015729794 | 0.015729794 | 0.098069113 | 5365 | CD1E/GP1BB/KITLG/CD7/GP1BA/CD59/CD1C/CR2/CD19/CSF3R/FLT3LG/CD2/IL3RA/IL2RA/HLA-DRB1/ITGA2/HLA-DRB5/IL9R/ITGA3/CD34/CD1D/ITGB3/CD1A/FLT3/IL4R/CD3E/TFRC/ITGAM/IL1B/MS4A1/CD38/HLA-DRA/IL1R2/CD33/CD14/CSF2RA/CD55/ITGA2B/CSF1 |
| ASH1L | KEGG_B_CELL_RECEPTOR_SIGNALING_PATHWAY | 74 | -0.341222675 | -1.44346193 | 0.015778055 | 0.015778055 | 0.098069113 | 4417 | INPP5D/CR2/CD19/VAV1/RASGRP3/PIK3CA/PIK3CG/VAV2/VAV3/PIK3R1/PRKCB/RAC2/CD79B/PLCG2/PIK3R5/PIK3AP1/BTK/NFKB1/FOS/MAP2K1/PIK3CD/CARD11/MAPK3/KRAS/MAP2K2/GRB2/HRAS/LYN/RAC1/NFATC3/RELA |
| ASH1L | KEGG_CHRONIC_MYELOID_LEUKEMIA | 73 | -0.344475544 | -1.451487093 | 0.01890139 | 0.01890139 | 0.11214222 | 4187 | PIK3CA/PIK3CG/STAT5A/SMAD3/SHC1/CDKN1A/PIK3R1/TGFB2/CCND1/PIK3R5/TGFB3/TP53/NFKB1/MYC/CRK/PTPN11/MAP2K1/PIK3CD/MAPK3/KRAS/CRKL/HDAC1/MAP2K2/GRB2/HRAS/RELA |
| ASH1L | KEGG_GAP_JUNCTION | 86 | -0.320748342 | -1.393004918 | 0.021122391 | 0.021122391 | 0.116075856 | 3187 | TUBB2A/PRKG2/PDGFA/TUBB/MAP2K5/ADCY1/PRKCB/TUBA4A/TUBA1C/TUBB6/PRKACG/SRC/TUBB3/ADCY4/MAP2K1/EGF/TJP1/GJA1/MAPK3/KRAS/MAP2K2/LPAR1/GRB2/HRAS/TUBA1A |
| ASH1L | KEGG_SELENOAMINO_ACID_METABOLISM | 24 | -0.48277541 | -1.566452115 | 0.021786246 | 0.021786246 | 0.116075856 | 3694 | MAT2B/SEPHS2/LCMT1/GGT1/TRMT11/METTL6/SCLY/MARS2/GGT5/GGT7/PAPSS2/AHCY/LCMT2 |
| ASH1L | KEGG_BLADDER_CANCER | 40 | -0.407000997 | -1.508106813 | 0.022232271 | 0.022232271 | 0.116075856 | 1919 | VEGFA/THBS1/TP53/MYC/MAP2K1/EGF/VEGFB/CDH1/MAPK3/KRAS/MAP2K2/HRAS |
| ASH1L | KEGG_AMINO_SUGAR_AND_NUCLEOTIDE_SUGAR_METABOLISM | 42 | -0.396299892 | -1.490661503 | 0.0249771 | 0.0249771 | 0.121516177 | 3458 | RENBP/PGM2/UAP1/GNPDA1/UGP2/HK3/GFPT2/NAGK/NPL/PMM2/GFPT1/UGDH/GMPPA/GALE/GMPPB/HK1 |
| ASH1L | KEGG_EPITHELIAL_CELL_SIGNALING_IN_HELICOBACTER_PYLORI_INFECTION | 66 | -0.350679167 | -1.438165347 | 0.025136209 | 0.025136209 | 0.121516177 | 2306 | ATP6V1E1/PLCG2/IGSF5/NFKB1/ATP6V0E1/HBEGF/ATP6V1A/SRC/MAPK14/PTPN11/MAPK12/TJP1/MET/ATP6V1B2/LYN/JAM3/RAC1/RELA |
| ASH1L | KEGG_FC_GAMMA_R_MEDIATED_PHAGOCYTOSIS | 91 | -0.312268841 | -1.368725162 | 0.040170595 | 0.040170595 | 0.187261422 | 4417 | INPP5D/NCF1/CDC42/VAV1/PIK3CA/PIK3CG/RPS6KB1/ASAP3/FCGR3A/VAV2/VAV3/ARPC1B/PAK1/PIK3R1/AMPH/PRKCB/CFL2/RAC2/DNM1L/PLCG2/PIK3R5/PIP5K1C/CRK/FCGR2C/FCGR2A/MAP2K1/PIK3CD/PLD1/SCIN/DOCK2/WASF3/ARPC4/ASAP2/MAPK3/CRKL/WAS/LYN/HCK/ARF6/RAC1 |
| ASH1L | KEGG_AMYOTROPHIC_LATERAL_SCLEROSIS_ALS | 52 | -0.357430156 | -1.391251018 | 0.044628099 | 0.044628099 | 0.200866944 | 3006 | TNFRSF1A/CCS/DAXX/DERL1/TP53/TOMM40L/MAPK14/TNFRSF1B/MAPK12/GRIN2C/CASP1/BAX/BCL2/RAC1/TOMM40/CYCS |
| ASH1L | KEGG_CITRATE_CYCLE_TCA_CYCLE | 30 | -0.437208862 | -1.51075799 | 0.049423394 | 0.049423394 | 0.215035117 | 3455 | DLD/IDH2/ACO1/ACO2/PCK1/SDHB/PDHB/IDH3B/SDHD/SDHA/MDH2 |
| G6PD | KEGG_DNA_REPLICATION | 36 | -0.746862027 | -2.801919915 | 1.00E-10 | 1.00E-10 | 5.63E-09 | 2135 | RPA3/RNASEH2A/RFC3/MCM2/RPA4/RNASEH2B/POLA2/DNA2/POLE3/MCM3/MCM5/POLE2/POLD3/MCM7/POLA1/RFC5/RFC2/POLD1/MCM6/PRIM1/FEN1/MCM4/LIG1/PRIM2/RFC4/PCNA |
| G6PD | KEGG_RIBOSOME | 87 | -0.605897194 | -2.726078777 | 1.00E-10 | 1.00E-10 | 5.63E-09 | 4255 | RPL29/RPL39/RPL38/RPS6/RPL7A/RPS4X/RPL32/RPL18/RPLP1/RPLP0/RPS17/RPS19/RPL4/RPL41/RPL9/RPL35/RPS10/RPS7/RPL13/RPL27/RPS21/RPS27/RPL36AL/RPL10A/RPL27A/RPL37A/RPL14/RPL15/RPL23A/RPS25/RPS9/RPL24/RPL5/RPS28/RPS27A/RPL7/RPSA/RSL24D1/RPL11/RPL6/RPL23/RPL36A/RPS12/RPL30/RPL34/RPS8/RPL37/RPL17/RPS29/RPL31/RPL26/RPS3A/RPL21/RPL22 |
| G6PD | KEGG_MISMATCH_REPAIR | 23 | -0.704943563 | -2.341169975 | 1.74E-06 | 1.74E-06 | 6.53E-05 | 3002 | RPA2/MLH1/MSH2/RPA3/RFC3/RPA4/POLD3/RFC5/RFC2/POLD1/LIG1/EXO1/MSH6/RFC4/PCNA/MSH3 |
| G6PD | KEGG_VEGF_SIGNALING_PATHWAY | 74 | 0.491264203 | 2.092994358 | 3.32E-06 | 3.32E-06 | 9.34E-05 | 2760 | MAPK3/BAD/AKT2/CASP9/PLA2G2A/MAPK11/HRAS/SH2D2A/PIK3CB/HSPB1/MAPK1/MAP2K1/PLCG2/MAPKAPK3/MAPK13/NOS3/PLA2G5/MAPKAPK2/CHP2/MAPK14/RAC2/AKT1/RAF1/NRAS/PPP3CB/SPHK2/PPP3CC/PTK2/KDR |
| G6PD | KEGG_NUCLEOTIDE_EXCISION_REPAIR | 43 | -0.528613274 | -2.060424916 | 5.86E-05 | 5.86E-05 | 0.001172896 | 2135 | RPA3/RFC3/DDB2/GTF2H1/RPA4/CETN2/POLE3/POLE2/POLD3/XPA/CUL4B/RFC5/RFC2/POLD1/LIG1/ERCC6/RFC4/PCNA |
| G6PD | KEGG_TOLL_LIKE_RECEPTOR_SIGNALING_PATHWAY | 96 | 0.420136537 | 1.859308958 | 6.25E-05 | 6.25E-05 | 0.001172896 | 4542 | MAPK3/IKBKG/MYD88/IRF3/AKT2/MAP2K7/MAPK11/TLR3/TICAM1/PIK3CB/MAPK1/MAP3K8/MAP2K1/MAPK13/TLR1/CASP8/FOS/TLR4/RELA/IRAK4/SPP1/IRAK1/MAPK14/TOLLIP/AKT1/TBK1/IRF7/TRAF6/IFNAR2/TLR5/IL12A/IRF5/CCL4/TLR9/CD14/IL12B/NFKB1/JUN/LBP/IFNA6/TIRAP/TNF/PIK3CA/IFNA14/PIK3CG |
| G6PD | KEGG_EPITHELIAL_CELL_SIGNALING_IN_HELICOBACTER_PYLORI_INFECTION | 66 | 0.470187998 | 1.950750542 | 8.58E-05 | 8.58E-05 | 0.001381086 | 2403 | ATP6V1F/IKBKG/HBEGF/ATP6V0B/ATP6AP1/CSK/MAPK11/ATP6V0C/MAP3K14/PLCG2/ATP6V1B2/MAPK13/ATP6V1A/ATP6V1E1/ATP6V0E1/GIT1/RELA/ATP6V0A1/ATP6V1C2/MAPK14/TCIRG1/ATP6V0D1/ATP6V1G3 |
| G6PD | KEGG_RNA_DEGRADATION | 50 | -0.498480251 | -2.001635262 | 0.000194977 | 0.000194977 | 0.002745071 | 3265 | CNOT2/LSM2/DCP1B/EDC3/EXOSC2/LSM7/CNOT4/ZCCHC7/LSM6/PAPOLA/HSPD1/EXOSC8/DCP2/CNOT6/CNOT10/XRN1/LSM3/EXOSC3/DDX6/CNOT7/LSM5/DCP1A/EXOSC9 |
| G6PD | KEGG_VIBRIO_CHOLERAE_INFECTION | 52 | 0.475156569 | 1.858927395 | 0.000404366 | 0.000404366 | 0.00506049 | 2403 | ATP6V1F/ATP6V0B/ATP6AP1/PRKACA/ATP6V0C/PLCG2/ATP6V1B2/ATP6V1A/ATP6V1E1/ATP6V0E1/ATP6V0A1/ADCY3/ATP6V1C2/TCIRG1/ARF1/KDELR1/ATP6V0D1/ATP6V1G3 |
| G6PD | KEGG_VASOPRESSIN_REGULATED_WATER_REABSORPTION | 44 | 0.496621756 | 1.874316396 | 0.000480832 | 0.000480832 | 0.005415683 | 3919 | RAB5C/ARHGDIA/DCTN2/RAB5B/PRKACA/RAB11B/VAMP2/DCTN1/DYNC1I2/CREB3/STX4/ADCY3/DYNC1LI1/RAB5A/GNAS/CREB3L1/RAB11A/AQP3/AVPR2 |
| G6PD | KEGG_ARACHIDONIC_ACID_METABOLISM | 57 | 0.448602122 | 1.800178811 | 0.000728339 | 0.000728339 | 0.007457634 | 2158 | GPX1/PTGDS/PTGES2/GPX2/PLA2G2A/CYP2E1/CYP4F3/GPX4/GGT1/CYP2C18/PLA2G5/LTC4S/GPX3/CYP2C9/CYP2C19/PTGS1 |
| G6PD | KEGG_APOPTOSIS | 86 | 0.400585962 | 1.739468108 | 0.000863177 | 0.000863177 | 0.008101747 | 2526 | BCL2L1/BAD/IKBKG/MYD88/AKT2/CASP9/PRKACA/FAS/MAP3K14/PIK3CB/IL1R1/ENDOD1/CASP8/CFLAR/RELA/TRADD/CAPN1/TNFRSF10A/TNFRSF1A/IRAK4/PRKAR2A/IRAK1/CHP2/TNFSF10/AKT1/PPP3CB/PPP3CC |
| G6PD | KEGG_BASAL_CELL_CARCINOMA | 55 | -0.443225413 | -1.78897378 | 0.000954135 | 0.000954135 | 0.008266595 | 2269 | FZD3/WNT11/SUFU/WNT5A/TCF7/LEF1/FZD10/FZD7/WNT3/SMO/FZD1/CTNNB1/GLI1/FZD4/PTCH1/HHIP |
| G6PD | KEGG_HOMOLOGOUS_RECOMBINATION | 26 | -0.538284174 | -1.841223703 | 0.001332674 | 0.001332674 | 0.010168201 | 3267 | RAD51C/RPA2/XRCC3/RAD50/EME1/RPA3/RAD51D/RPA4/POLD3/XRCC2/POLD1/RAD54L/BLM/BRCA2/RAD51 |
| G6PD | KEGG_B_CELL_RECEPTOR_SIGNALING_PATHWAY | 74 | 0.404828449 | 1.724741299 | 0.001354176 | 0.001354176 | 0.010168201 | 4542 | MAPK3/IKBKG/PTPN6/NFKBIB/AKT2/HRAS/PIK3CB/MAPK1/MAP2K1/PLCG2/VAV1/FOS/RELA/CD81/CHP2/RAC2/AKT1/RAF1/NRAS/BLNK/PPP3CB/PPP3CC/MALT1/VAV3/CD79B/RASGRP3/GRB2/NFKB1/SOS1/JUN/PIK3CA/PIK3CG |
| G6PD | KEGG_ACUTE_MYELOID_LEUKEMIA | 57 | 0.425441627 | 1.707238921 | 0.00230333 | 0.00230333 | 0.016214233 | 4711 | MAPK3/STAT3/BAD/IKBKG/JUP/ARAF/AKT2/HRAS/PML/PIK3CB/MAPK1/MAP2K1/RARA/RELA/ZBTB16/RPS6KB2/AKT1/RAF1/NRAS/PPARD/PIM1/SPI1/STAT5A/GRB2/NFKB1/SOS1/PIK3CA/PIK3CG/STAT5B/TCF7L2 |
| G6PD | KEGG_P53_SIGNALING_PATHWAY | 65 | -0.393279846 | -1.66834441 | 0.002708637 | 0.002708637 | 0.017363536 | 3227 | APAF1/CHEK2/ATM/CDK2/CCNG1/RRM2B/BID/STEAP3/DDB2/TNFRSF10B/BBC3/CCND1/TP73/RCHY1/IGF1/CCND2/PMAIP1/CCNB1/GTSE1/PTEN/CCNE2/CCNB2/CDK1/BAX/RRM2/CHEK1/CDK6 |
| G6PD | KEGG_OXIDATIVE_PHOSPHORYLATION | 99 | 0.356347646 | 1.580735945 | 0.002871891 | 0.002871891 | 0.017363536 | 3705 | CYC1/COX4I2/ATP6V1F/ATP6V0B/ATP6AP1/SDHB/NDUFA3/NDUFV1/NDUFB7/NDUFA4L2/ATP6V0C/UQCRC1/ATP6V1B2/ATP12A/COX5B/ATP6V1A/UQCR10/ATP6V1E1/ATP6V0E1/NDUFB8/ATP6V0A1/COX8A/COX10/ATP6V1C2/NDUFV2/TCIRG1/ATP6V0D1/ATP6V1G3/NDUFS1/COX6A1/COX6B1/NDUFB3/COX6A2/NDUFS4/COX7B/UQCRQ/NDUFB4 |
| G6PD | KEGG_GLYCOSAMINOGLYCAN_DEGRADATION | 21 | 0.560782959 | 1.792507723 | 0.002929082 | 0.002929082 | 0.017363536 | 2943 | HYAL3/ARSB/HPSE/GALNS/HGSNAT/HYAL1/IDUA/HEXA/NAGLU/IDS |
| G6PD | KEGG_FC_GAMMA_R_MEDIATED_PHAGOCYTOSIS | 91 | 0.358326254 | 1.579341971 | 0.003907101 | 0.003907101 | 0.021159904 | 3643 | MAPK3/PIP5K1C/LIMK2/AKT2/CFL1/WASF2/ARPC4/PIK3CB/MAPK1/MAP2K1/PLCG2/ASAP3/VAV1/GAB2/RPS6KB2/RAC2/AKT1/RAF1/SPHK2/GSN/CRK/ARPC2/PRKCD/ARPC5/VAV3/SCIN/LIMK1/WAS/SPHK1/ARPC1B |
| G6PD | KEGG_GLYCOSAMINOGLYCAN_BIOSYNTHESIS_KERATAN_SULFATE | 14 | 0.624789303 | 1.753490435 | 0.003945234 | 0.003945234 | 0.021159904 | 3031 | B3GNT7/B4GALT3/B3GNT2/CHST2/CHST6/B4GALT4/ST3GAL1 |
| G6PD | KEGG_FC_EPSILON_RI_SIGNALING_PATHWAY | 78 | 0.378160674 | 1.629332056 | 0.004178174 | 0.004178174 | 0.021390653 | 2447 | MAPK3/AKT2/MAP2K7/FYN/PLA2G2A/MAPK11/HRAS/PIK3CB/MAPK1/MAP2K1/PDPK1/PLCG2/MAPK13/VAV1/PLA2G5/GAB2/MAPK14/RAC2/AKT1/RAF1/NRAS |
| G6PD | KEGG_LEISHMANIA_INFECTION | 68 | 0.388370191 | 1.621701412 | 0.004637999 | 0.004637999 | 0.022712398 | 3987 | MAPK3/PTPN6/MYD88/NFKBIB/HLA-DMA/MAPK11/MAPK1/JAK1/MAPK13/HLA-DMB/TGFB1/FOS/TLR4/RELA/IRAK4/IRAK1/MAPK14/TGFB2/TRAF6/IFNGR1/ITGAM/IL12A/CYBA/IFNGR2/IL12B/NFKB1 |
| G6PD | KEGG_ADIPOCYTOKINE_SIGNALING_PATHWAY | 66 | 0.39953104 | 1.657603761 | 0.005040906 | 0.005040906 | 0.023656884 | 2459 | STAT3/ADIPOR1/IKBKG/ACSL1/NFKBIB/AKT2/PRKAG3/SOCS3/ADIPOR2/PPARA/RELA/ACSL4/TRADD/IRS2/TNFRSF1A/CPT1C/LEPR/AKT1/CPT1A/CAMKK2 |
| G6PD | KEGG_SNARE_INTERACTIONS_IN_VESICULAR_TRANSPORT | 38 | 0.45836654 | 1.654509838 | 0.005760242 | 0.005760242 | 0.025951406 | 4263 | STX5/STX11/VAMP2/VAMP5/STX17/VAMP8/BNIP1/STX4/SNAP29/STX3/VAMP4/USE1/STX1A/VAMP3/VTI1A/SEC22B/STX7/YKT6/STX19/BET1L |
| G6PD | KEGG_INOSITOL_PHOSPHATE_METABOLISM | 54 | 0.406768622 | 1.618312606 | 0.006497978 | 0.006497978 | 0.028149136 | 3030 | PIP5K1C/PLCB3/PIP4K2C/CDIPT/INPP5K/PLCD1/PLCD3/PIK3CB/PLCG2/PI4KA/PI4KB/TPI1/ITPK1/INPP5E/IPPK/INPP5A/INPP4B/INPP1 |
| G6PD | KEGG_BASE_EXCISION_REPAIR | 33 | -0.460722607 | -1.669151501 | 0.007582289 | 0.007582289 | 0.031386905 | 2201 | PARP2/NEIL2/POLB/UNG/XRCC1/PARP1/POLE3/POLE2/POLD3/NEIL3/POLD1/FEN1/LIG1/PCNA/HMGB1 |
| G6PD | KEGG_ADHERENS_JUNCTION | 68 | 0.378025863 | 1.578507027 | 0.007802726 | 0.007802726 | 0.031386905 | 3542 | ACTN4/MAPK3/FARP2/PTPN6/RHOA/PTPRM/FYN/WASF2/MAPK1/CTNNA1/ACTN3/ERBB2/SMAD2/CDH1/RAC2/CTNND1/PTPN1/MET/CSNK2B/PARD3/CTNNA3/SMAD3/ACTN1/WAS/SORBS1/LMO7 |
| G6PD | KEGG_LONG_TERM_POTENTIATION | 69 | 0.377263034 | 1.58278202 | 0.008171538 | 0.008171538 | 0.031737007 | 3345 | MAPK3/PLCB3/ARAF/PRKACA/HRAS/MAPK1/MAP2K1/ADCY1/PPP1CA/RAPGEF3/RPS6KA2/CHP2/GNAQ/RAF1/NRAS/PPP3CB/PPP3CC/GRIA1/CALM3/ITPR1/CACNA1C/CALML5/GRIN2D/PPP1R1A |
| G6PD | KEGG_PARKINSONS_DISEASE | 98 | 0.333594637 | 1.474935804 | 0.008848607 | 0.008848607 | 0.033221087 | 3705 | CYC1/COX4I2/UBE2G2/CASP9/SDHB/NDUFA3/NDUFV1/NDUFB7/NDUFA4L2/UQCRC1/UBE2G1/COX5B/UQCR10/UBE2L6/UBE2J1/NDUFB8/SLC18A2/HTRA2/UBA7/COX8A/UBA1/TH/NDUFV2/SLC25A4/VDAC1/NDUFS1/UBE2L3/COX6A1/COX6B1/NDUFB3/COX6A2/UBE2J2/NDUFS4/COX7B/UQCRQ/NDUFB4 |
| G6PD | KEGG_COMPLEMENT_AND_COAGULATION_CASCADES | 69 | 0.373180798 | 1.565655267 | 0.009407541 | 0.009407541 | 0.033943859 | 3972 | F2/C2/CFD/BDKRB2/CD55/C4B/C1S/A2M/C4BPA/F12/BDKRB1/C4A/SERPING1/C9/C8B/FGG/C1R/C7/FGB/SERPINE1/CD46/F13B/THBD/PROS1/MASP2/KNG1 |
| G6PD | KEGG_AMINO_SUGAR_AND_NUCLEOTIDE_SUGAR_METABOLISM | 42 | 0.432677469 | 1.594691827 | 0.009643863 | 0.009643863 | 0.033943859 | 4700 | CYB5R3/UAP1/CYB5R1/PMM2/GALE/NAGK/GMPPA/GPI/GNE/HEXA/RENBP/PMM1/HK1/PGM1/CHIA/MPI/PGM3/GALK1/GFPT2 |
| G6PD | KEGG_GNRH_SIGNALING_PATHWAY | 100 | 0.340023029 | 1.516140743 | 0.010150389 | 0.010150389 | 0.034644069 | 3285 | MAPK3/PLCB3/HBEGF/GNA11/MAP2K7/PRKACA/PLA2G2A/MAPK11/HRAS/MAPK1/MAP2K1/MAPK7/ADCY1/MAPK13/CGA/PLA2G5/GNRH2/ADCY3/MAPK14/GNAQ/RAF1/NRAS/PRKCD/CALM3/ITPR1/PLA2G10/CACNA1C/GNAS/CALML5 |
| G6PD | KEGG_AMYOTROPHIC_LATERAL_SCLEROSIS_ALS | 52 | 0.402434634 | 1.5744216 | 0.010623821 | 0.010623821 | 0.035193462 | 3341 | BCL2L1/BAD/GPX1/CASP9/MAPK11/MAPK13/DAXX/TNFRSF1A/TOMM40/CHP2/MAPK14/PPP3CB/PPP3CC/SOD1/GRIA1/CCS/RAB5A/PRPH/GRIN2D |
| G6PD | KEGG_PENTOSE_PHOSPHATE_PATHWAY | 26 | 0.4885905 | 1.64482981 | 0.011590152 | 0.011590152 | 0.037135671 | 4916 | G6PD/ALDOA/PFKP/PRPS2/GPI/PFKL/TKT/PGM1/ALDOC/DERA/RPIA/ALDOB |
| G6PD | KEGG_ERBB_SIGNALING_PATHWAY | 86 | 0.348856914 | 1.514844589 | 0.012043127 | 0.012043127 | 0.037135671 | 4596 | MAPK3/BAD/HBEGF/CDKN1A/SHC1/ARAF/AKT2/MAP2K7/HRAS/PIK3CB/MAPK1/MAP2K1/PLCG2/ERBB3/CBLB/ERBB2/RPS6KB2/AKT1/RAF1/NRAS/CRK/PTK2/STAT5A/PAK3/GRB2/CBLC/SOS1/EGF/JUN/PAK4/NCK1/PIK3CA/PIK3CG/STAT5B |
| G6PD | KEGG_RENAL_CELL_CARCINOMA | 66 | 0.375240155 | 1.55682395 | 0.012199241 | 0.012199241 | 0.037135671 | 4695 | MAPK3/ARAF/AKT2/HRAS/PIK3CB/PDGFB/MAPK1/MAP2K1/TGFB1/EPAS1/HIF1A/AKT1/RAF1/VEGFC/NRAS/CRK/TGFB2/MET/HGF/VEGFB/PAK3/GRB2/SOS1/JUN/PAK4/PIK3CA/PIK3CG/RAPGEF1 |
| G6PD | KEGG_PRION_DISEASES | 35 | 0.435597469 | 1.546267674 | 0.014760255 | 0.014760255 | 0.043749234 | 4630 | MAPK3/FYN/PRKACA/MAPK1/MAP2K1/STIP1/C9/C8B/LAMC1/SOD1/C7/HSPA1A/HSPA5/C6/PRKX/NOTCH1 |
| G6PD | KEGG_ENDOMETRIAL_CANCER | 52 | 0.390247011 | 1.526740672 | 0.015491176 | 0.015491176 | 0.04473835 | 2447 | MAPK3/BAD/ILK/ARAF/AKT2/CASP9/HRAS/PIK3CB/MAPK1/MAP2K1/PDPK1/CTNNA1/ERBB2/CDH1/AKT1/RAF1/NRAS |
| G6PD | KEGG_SELENOAMINO_ACID_METABOLISM | 24 | 0.485152094 | 1.593882719 | 0.016377259 | 0.016377259 | 0.046114914 | 4578 | MAT2A/GGT1/PAPSS1/AHCYL1/SCLY/SEPHS2/HEMK1/AHCY/GGT5/LCMT1/METTL6/GGT7 |
| G6PD | KEGG_MTOR_SIGNALING_PATHWAY | 51 | 0.384371309 | 1.490366114 | 0.017757211 | 0.017757211 | 0.048781042 | 4899 | MAPK3/STRADA/AKT2/ULK1/PIK3CB/MAPK1/PDPK1/RPS6KA2/HIF1A/RPS6KB2/AKT1/MLST8/VEGFC/ULK3/TSC2/RPTOR/EIF4E2/VEGFB/STK11/ULK2/PIK3CA/PIK3CG/INS/CAB39L |
| G6PD | KEGG_PANCREATIC_CANCER | 69 | 0.352562893 | 1.479154215 | 0.019460043 | 0.019460043 | 0.05218608 | 2422 | MAPK3/STAT3/BCL2L1/BAD/IKBKG/ARAF/AKT2/CASP9/PIK3CB/MAPK1/MAP2K1/JAK1/TGFB1/RELA/ERBB2/SMAD2/RALA/RAC2/AKT1/RAF1/VEGFC |
| G6PD | KEGG_CHRONIC_MYELOID_LEUKEMIA | 73 | 0.338079005 | 1.439399789 | 0.021897085 | 0.021897085 | 0.05735589 | 2533 | MAPK3/BCL2L1/BAD/IKBKG/CDKN1A/SHC1/ARAF/AKT2/HRAS/PIK3CB/MAPK1/MAP2K1/CBLB/TGFB1/RELA/HDAC1/BCR/GAB2/AKT1/RAF1/NRAS/CRK |
| G6PD | KEGG_CIRCADIAN_RHYTHM_MAMMAL | 12 | 0.608220559 | 1.626344932 | 0.030475845 | 0.030475845 | 0.078012331 | 1714 | CSNK1D/CRY2/NPAS2/PER2/CLOCK/NR1D1/BHLHE40 |
| G6PD | KEGG_GAP_JUNCTION | 86 | 0.323362488 | 1.404139906 | 0.032158329 | 0.032158329 | 0.080489854 | 2447 | MAPK3/CSNK1D/PLCB3/GNA11/PRKACA/HRAS/PDGFA/PDGFB/MAPK1/MAP2K1/MAPK7/ADCY1/TUBB8/ADCY3/TUBA4A/GNAQ/RAF1/HTR2A/NRAS |
| G6PD | KEGG_REGULATION_OF_AUTOPHAGY | 30 | 0.436866861 | 1.518565368 | 0.034024383 | 0.034024383 | 0.083309131 | 5800 | ULK1/ATG4A/ATG4D/GABARAPL1/GABARAPL2/ULK3/ATG3/ATG7/BECN1/ULK2/IFNA6/IFNA14/GABARAP/INS/IFNA16/PIK3R4/IFNA21/ATG5/PIK3C3/ATG4B |
| G6PD | KEGG_CYTOSOLIC_DNA_SENSING_PATHWAY | 48 | 0.376501687 | 1.445100714 | 0.04743833 | 0.04743833 | 0.113682001 | 4818 | IKBKG/NFKBIB/IRF3/POLR3F/POLR3D/POLR1D/RELA/RIPK3/TBK1/IRF7/MAVS/POLR3A/TREX1/CCL4/NFKB1/POLR3K/IFNA6/IFNA14/ZBP1/IFNA16 |
| LAP3 | KEGG_RIBOSOME | 87 | 0.539088923 | 2.4198599 | 8.73E-10 | 8.73E-10 | 1.18E-07 | 3714 | RSL24D1/RPS12/RPL7/RPL17/RPL34/RPL26/RPL30/RPL11/RPL21/RPS19/RPS27/RPS3A/RPL31/RPL22/RPS9/RPS16/RPL13/RPSA/RPL22L1/RPS27L/RPS28/RPS24/RPL37A/RPS23/RPS3/RPL9/RPL4/RPS10/RPS27A/RPS8/RPS25/RPL23A/RPL15/RPL36A/RPL3L/RPL35/RPL37/RPS7/RPL10L/RPL5/RPL41/RPL18/RPS15A/RPL29/RPLP0 |
| LAP3 | KEGG_COMPLEMENT_AND_COAGULATION_CASCADES | 69 | 0.47706107 | 2.053138611 | 9.92E-06 | 9.92E-06 | 0.000673183 | 4425 | CFB/CFI/F2R/THBD/PLAT/PLG/CFH/C1QB/C1QA/TFPI/PROS1/C1R/SERPINE1/C1QC/F13A1/PLAUR/CR2/C5AR1/CD55/SERPINF2/C4BPB/C3/BDKRB2/F3/CD59/C8B/F8/C4A/BDKRB1/PLAU/C4B/SERPING1/FGB/C4BPA/A2M/FGA |
| LAP3 | KEGG_SYSTEMIC_LUPUS_ERYTHEMATOSUS | 53 | 0.518367301 | 2.089378254 | 1.51E-05 | 1.51E-05 | 0.000683441 | 3703 | FCGR2C/FCGR3A/IFNG/CD40/FCGR2A/IL10/HLA-DRA/SNRPD3/HLA-DQB1/HLA-DPA1/CD28/SSB/HLA-DRB5/HLA-DPB1/C1QB/C1QA/CD86/C1R/C1QC/HLA-DRB1/HLA-DOA/TNF/C3/SNRPD1/C8B/FCGR2B/C4A/C4B/SNRPB/ACTN2 |
| LAP3 | KEGG_ALLOGRAFT_REJECTION | 35 | 0.565907338 | 2.046012075 | 5.64E-05 | 5.64E-05 | 0.001915362 | 2533 | HLA-F/IFNG/CD40/HLA-A/IL10/HLA-DRA/HLA-DQB1/HLA-DPA1/HLA-B/CD28/HLA-DRB5/HLA-DPB1/CD86/HLA-G/HLA-DRB1/FASLG/HLA-DOA/TNF |
| LAP3 | KEGG_HEMATOPOIETIC_CELL_LINEAGE | 84 | 0.416927732 | 1.859159583 | 0.000126352 | 0.000126352 | 0.003162303 | 4657 | CD38/IL1R2/IL2RA/CD33/HLA-DRA/CD5/CD1A/IL1B/CD3G/ITGB3/IL3RA/HLA-DRB5/CD2/ITGA2B/IL4R/CSF1/ITGA2/HLA-DRB1/CSF1R/CR2/CD55/TNF/IL7/ITGAM/CD3D/CD59/IL11/CD8A/CSF3R/FLT3/IL7R/CD19/IL1A/CSF2RA/MS4A1/IL6/CD14 |
| LAP3 | KEGG_OXIDATIVE_PHOSPHORYLATION | 99 | -0.389594347 | -1.787573971 | 0.00013973 | 0.00013973 | 0.003162303 | 4221 | COX4I1/NDUFS7/NDUFB1/NDUFV2/COX4I2/NDUFC1/COX6B2/COX7C/ATP6V1H/COX7B/ATP6V1E2/NDUFS1/ATP6V0A4/NDUFS8/PPA1/ATP6V0C/ATP6V0D1/NDUFA8/COX7B2/COX5B/ATP12A/COX7A2/UQCRQ/NDUFB8/ATP6V1F/NDUFA3/COX8C/NDUFV1/ATP6V0E2/NDUFA7/NDUFC2/NDUFA2/ATP6V1G1/COX17/COX6B1/ATP6AP1/UQCRC1/NDUFS5/UQCR11/NDUFA10/NDUFB7/CYC1/ATP6V0B/ATP6V1G2/COX8A/ATP6V1C2/NDUFB3 |
| LAP3 | KEGG_GRAFT_VERSUS_HOST_DISEASE | 35 | 0.536529706 | 1.939798593 | 0.000267416 | 0.000267416 | 0.005187474 | 4735 | HLA-F/IFNG/HLA-A/HLA-DRA/IL1B/HLA-DQB1/HLA-DPA1/HLA-B/CD28/HLA-DRB5/HLA-DPB1/CD86/HLA-G/HLA-DRB1/FASLG/HLA-DOA/TNF/KLRD1/PRF1/GZMB/IL1A/KLRC1/IL6/HLA-E/HLA-C |
| LAP3 | KEGG_VIRAL_MYOCARDITIS | 68 | 0.430091892 | 1.84585616 | 0.000390288 | 0.000390288 | 0.006624621 | 3395 | CYCS/HLA-F/CD40/HLA-A/CAV1/HLA-DRA/ICAM1/ITGB2/HLA-DQB1/HLA-DPA1/HLA-B/CD28/ITGAL/HLA-DRB5/HLA-DPB1/CD86/MYH6/HLA-G/HLA-DRB1/EIF4G3/CASP3/CD55/HLA-DOA/MYH10/SGCB/RAC2/RAC1/MYH11/PRF1 |
| LAP3 | KEGG_PEROXISOME | 78 | -0.389746601 | -1.685519187 | 0.001850338 | 0.001850338 | 0.027917377 | 3896 | HAO2/MPV17/PEX12/ACOX1/PEX11A/PEX26/ACSL4/ACSL3/PRDX5/ECH1/BAAT/PEX16/PAOX/MVK/ABCD1/DHRS4/GSTK1/ACOX3/DECR2/ACSL5/SOD1/ECI2/XDH/PEX10/IDH1/PEX6/PXMP4/NUDT19/PMVK/PEX11G/SLC25A17 |
| LAP3 | KEGG_P53_SIGNALING_PATHWAY | 65 | 0.388526294 | 1.648393946 | 0.002528046 | 0.002528046 | 0.034328205 | 2337 | CYCS/BAX/PTEN/THBS1/CCND2/ATM/CHEK2/RCHY1/PMAIP1/MDM4/GADD45A/SESN3/IGFBP3/APAF1/SHISA5/SIAH1/CCNG1/SERPINE1/CASP3 |
| LAP3 | KEGG_GLYCOSAMINOGLYCAN_DEGRADATION | 21 | -0.546645723 | -1.746612568 | 0.003630579 | 0.003630579 | 0.044817673 | 2722 | GALNS/HGSNAT/IDUA/HYAL4/HPSE2/GLB1/HEXA/SGSH/NAGLU |
| LAP3 | KEGG_AUTOIMMUNE_THYROID_DISEASE | 46 | 0.427312447 | 1.664224608 | 0.004267607 | 0.004267607 | 0.047673555 | 2449 | HLA-F/CD40/HLA-A/IL10/HLA-DRA/HLA-DQB1/HLA-DPA1/HLA-B/CD28/HLA-DRB5/HLA-DPB1/CD86/HLA-G/HLA-DRB1/FASLG/HLA-DOA |
| LAP3 | KEGG_TYPE_I_DIABETES_MELLITUS | 41 | 0.456616787 | 1.712188169 | 0.004900631 | 0.004900631 | 0.047673555 | 2533 | HLA-F/IFNG/HLA-A/HLA-DRA/IL1B/HLA-DQB1/HLA-DPA1/HLA-B/CD28/HLA-DRB5/HLA-DPB1/CD86/HLA-G/HLA-DRB1/FASLG/HLA-DOA/TNF |
| LAP3 | KEGG_ASTHMA | 28 | 0.502036468 | 1.748221109 | 0.00491518 | 0.00491518 | 0.047673555 | 2533 | CD40/IL10/HLA-DRA/HLA-DQB1/HLA-DPA1/HLA-DRB5/HLA-DPB1/HLA-DRB1/FCER1G/HLA-DOA/TNF |
| LAP3 | KEGG_TGF_BETA_SIGNALING_PATHWAY | 85 | 0.358832698 | 1.607814673 | 0.005756956 | 0.005756956 | 0.052115599 | 3986 | ZFYVE16/BMPR2/IFNG/THBS1/TGFBR1/RPS6KB1/SKP1/INHBA/ROCK1/ACVR2A/MYC/FST/TGFB2/SMAD6/SMURF1/INHBB/BMP6/TNF/NODAL/DCN/INHBE/THBS2/ACVR1/COMP/ACVR2B/TGFB3/ID4/TGFBR2/SP1/SMAD3/LEFTY2/CDKN2B/CREBBP |
| LAP3 | KEGG_PROTEIN_EXPORT | 22 | 0.532935504 | 1.747431144 | 0.007505076 | 0.007505076 | 0.063694395 | 1111 | SRP19/SEC11A/SEC63/SPCS2/SRP9/SEC61G/SEC62/SEC61A2 |
| LAP3 | KEGG_LEISHMANIA_INFECTION | 68 | 0.367991007 | 1.579333349 | 0.008065209 | 0.008065209 | 0.064421791 | 3046 | FCGR2C/FCGR3A/NCF2/IFNG/FCGR2A/STAT1/IL10/NFKB1/HLA-DRA/IL1B/ITGB2/PRKCB/HLA-DQB1/HLA-DPA1/NCF4/HLA-DRB5/HLA-DPB1/TGFB2/HLA-DRB1/HLA-DOA/TNF/C3/NOS2/JAK2/TGFB3/ITGAM |
| LAP3 | KEGG_ANTIGEN_PROCESSING_AND_PRESENTATION | 73 | 0.350398771 | 1.532863911 | 0.010350607 | 0.010350607 | 0.078083523 | 2608 | B2M/RFXAP/PSME2/HLA-F/HLA-A/IFI30/NFYB/CREB1/CIITA/HLA-DRA/HLA-DQB1/HLA-DPA1/HLA-B/HLA-DRB5/CTSS/HLA-DPB1/HLA-G/NFYA/HLA-DRB1/HLA-DOA/KIR3DL3 |
| LAP3 | KEGG_FATTY_ACID_METABOLISM | 42 | -0.416269097 | -1.605608473 | 0.011479839 | 0.011479839 | 0.082044281 | 3652 | ACOX1/HADH/ACAT2/ACSL4/ADH4/ACSL3/ADH6/HADHA/ACADL/ACOX3/CPT2/ECHS1/ACSL5/ECI2/HADHB/GCDH/CPT1A/ACADVL |
| LAP3 | KEGG_PARKINSONS_DISEASE | 98 | -0.311818423 | -1.427481879 | 0.016639821 | 0.016639821 | 0.112975624 | 4221 | COX4I1/NDUFS7/NDUFB1/NDUFV2/COX4I2/UBE2G2/NDUFC1/COX6B2/COX7C/COX7B/GPR37/NDUFS1/NDUFS8/CASP9/NDUFA8/UBE2J1/COX7B2/SLC25A4/COX5B/UBE2J2/COX7A2/VDAC1/UQCRQ/NDUFB8/NDUFA3/COX8C/NDUFV1/UBE2G1/NDUFA7/NDUFC2/NDUFA2/COX6B1/UQCRC1/NDUFS5/UQCR11/NDUFA10/NDUFB7/CYC1/UBA1/COX8A/NDUFB3 |
| LAP3 | KEGG_STEROID_BIOSYNTHESIS | 16 | -0.535857452 | -1.58031229 | 0.021098518 | 0.021098518 | 0.136426507 | 3500 | MSMO1/CYP27B1/CEL/HSD17B7/TM7SF2/DHCR7/EBP/SQLE/LSS/NSDHL/FDFT1 |
| LAP3 | KEGG_VALINE_LEUCINE_AND_ISOLEUCINE_DEGRADATION | 43 | -0.366537965 | -1.415969354 | 0.033178025 | 0.033178025 | 0.204783022 | 5463 | PCCB/DLD/IVD/HMGCS1/ACAA1/HMGCL/HIBCH/ACADS/HIBADH/MCCC1/HADH/PCCA/ACAT2/OXCT1/MCCC2/HADHA/BCKDHB/BCAT2/ECHS1/BCKDHA/ACAD8/HMGCS2/DBT/MCEE/ALDH6A1/HADHB |
| LAP3 | KEGG_NOD_LIKE_RECEPTOR_SIGNALING_PATHWAY | 60 | 0.344089577 | 1.427413061 | 0.035854295 | 0.035854295 | 0.207099211 | 2533 | CASP1/SUGT1/IL18/CASP5/NFKB1/PYDC1/NLRP3/IL1B/MEFV/NLRP1/CARD8/NAIP/CARD6/CCL5/CCL8/TNF |
| LAP3 | KEGG_VASOPRESSIN_REGULATED_WATER_REABSORPTION | 44 | -0.385552018 | -1.494272193 | 0.036603581 | 0.036603581 | 0.207099211 | 3140 | CREB3/ADCY6/DYNC1H1/DYNLL2/RAB5C/NSF/CREB3L4/DYNC1I1/PRKACA/RAB5B/GNAS/PRKX/CREB3L2/DCTN2/RAB11B/CREB3L1/VAMP2 |
| LAP3 | KEGG_AMINOACYL_TRNA_BIOSYNTHESIS | 22 | -0.456951777 | -1.482127524 | 0.048923679 | 0.048923679 | 0.263991632 | 3763 | FARS2/FARSA/FARSB/YARS2/SARS2/IARS2/PARS2/AARS2 |
| SETDB1 | KEGG_RIBOSOME | 87 | -0.625646425 | -2.797277618 | 1.00E-10 | 1.00E-10 | 1.25E-08 | 3896 | RPL14/RPS4X/RPL41/RPS7/RPL13/RPL23/RPL15/RPL3L/RPL3/RPL9/RPS21/RPS26/RPS28/RPL10A/RPL36A/RPS24/RPL36AL/RPS23/RPL18/RPL10L/RPL11/RPL26L1/RPS25/RPS27L/RPL39/RPL23A/RPL13A/RPL22L1/RPS8/RPL35/RPL31/RPL37/RPLP0/RPL29/RPS15A/RPS10/RPL5/RPL4/RPS3/RPS27A/RPS16/RPL30/RPS27/RPL22/RPSA/RPS3A/RPS19/RSL24D1/RPS9/RPL21/RPL26/RPS12/RPL7/RPL34/RPL17 |
| SETDB1 | KEGG_PEROXISOME | 78 | 0.475521376 | 2.090016816 | 1.06E-05 | 1.06E-05 | 0.000664483 | 4215 | PEX11G/XDH/PEX12/ACSL5/PXMP4/NUDT19/IDH1/PEX19/SLC25A17/PMVK/PEX7/ACOX3/SOD1/PEX16/PEX3/PAOX/ACSL3/GSTK1/ECI2/MVK/ABCD1/DHRS4/PEX11B/SCP2/ACOX1/PECR/ECH1/ACSL4/PRDX5/PEX13/PEX10/PEX11A/PRDX1/PEX1/CROT/ACOT8/PEX6/PEX2/ACSL1/DECR2 |
| SETDB1 | KEGG_ALLOGRAFT_REJECTION | 35 | -0.56418525 | -2.085273563 | 7.09E-05 | 7.09E-05 | 0.002960574 | 2973 | FASLG/HLA-DQB1/IFNG/CD28/PRF1/HLA-DOA/TNF/HLA-DRB5/HLA-G/HLA-C/HLA-DRB1/HLA-B/HLA-DPA1/HLA-DRA/HLA-A/CD86/IL10/HLA-F/CD40/HLA-DPB1 |
| SETDB1 | KEGG_GRAFT_VERSUS_HOST_DISEASE | 35 | -0.553133882 | -2.044426826 | 0.000125104 | 0.000125104 | 0.003807107 | 3939 | KIR3DL2/FASLG/IL1A/HLA-DQB1/IFNG/CD28/PRF1/KLRD1/HLA-DOA/TNF/HLA-DRB5/IL1B/HLA-G/HLA-C/HLA-DRB1/HLA-B/HLA-DPA1/HLA-DRA/HLA-A/CD86/HLA-F/HLA-DPB1 |
| SETDB1 | KEGG_DNA_REPLICATION | 36 | -0.524291252 | -1.947932716 | 0.000151964 | 0.000151964 | 0.003807107 | 4958 | MCM2/POLE3/RFC3/LIG1/PRIM1/POLA1/RPA2/MCM3/RFC1/MCM7/PCNA/POLD1/MCM6/FEN1/MCM5/POLE2/RFC2/RFC4/MCM4/RNASEH1/RPA4 |
| SETDB1 | KEGG_VALINE_LEUCINE_AND_ISOLEUCINE_DEGRADATION | 43 | 0.498215408 | 1.893256484 | 0.000385776 | 0.000385776 | 0.007673046 | 2772 | HADHB/MCEE/ALDH6A1/OXCT1/MCCC2/HMGCS2/BCAT2/MCCC1/DBT/BCKDHB/ECHS1/ACAT2/ACAD8/PCCA/HMGCS1/HIBADH/BCKDHA/HIBCH |
| SETDB1 | KEGG_OXIDATIVE_PHOSPHORYLATION | 99 | 0.37311191 | 1.692210804 | 0.000443751 | 0.000443751 | 0.007673046 | 3836 | ATP6V1G1/ATP6V1G2/NDUFC2/COX17/ATP6V1C2/ATP12A/ATP6V1F/ATP6V0B/ATP6V0E2/NDUFB3/COX8A/NDUFA2/ATP6AP1/NDUFS4/PPA1/UQCR11/UQCRQ/NDUFS5/COX5B/NDUFA7/NDUFA3/COX8C/NDUFB8/NDUFB7/NDUFA10/ATP6V1H/ATP6V0C/COX7A2/COX6A1/COX4I2/COX6B1/ATP6V0D1/NDUFC1/CYC1/ATP6V1G3/ATP6V0A1/NDUFV2/SDHC/NDUFV1/NDUFA1/NDUFS7/NDUFA8 |
| SETDB1 | KEGG_SYSTEMIC_LUPUS_ERYTHEMATOSUS | 53 | -0.464817367 | -1.86836091 | 0.000490043 | 0.000490043 | 0.007673046 | 3100 | C8B/C4B/IFNG/C4A/CD28/HLA-DOA/TNF/HLA-DRB5/SSB/HLA-DRB1/C3/HLA-DPA1/FCGR3A/HLA-DRA/CD86/SNRPB/IL10/CD40/HLA-DPB1/C1QB/C1QC/FCGR2A/FCGR2C/C1QA |
| SETDB1 | KEGG_FC_GAMMA_R_MEDIATED_PHAGOCYTOSIS | 91 | -0.375081979 | -1.693454427 | 0.000747708 | 0.000747708 | 0.010059609 | 3119 | PRKCE/ASAP2/WAS/PIK3R3/ARF6/PIK3R5/ARPC1B/VAV2/DNM1L/VAV3/LAT/AKT3/LIMK1/CRKL/PIK3CG/SCIN/RAC2/PAK1/CFL2/PTPRC/PLD2/WASF3/RPS6KB1/MARCKS/INPP5D/AMPH/FCGR3A/NCF1/PRKCB/FCGR2A/DOCK2/FCGR2C/HCK/PIK3CD/PLD1/LYN |
| SETDB1 | KEGG_HEMATOPOIETIC_CELL_LINEAGE | 84 | -0.387813957 | -1.721752205 | 0.000803078 | 0.000803078 | 0.010059609 | 4705 | CR1/ITGA3/CSF2RA/CD2/CD3E/CD3G/IL7/CD22/ITGA2B/IL1A/CD8B/CD3D/CD55/IL2RA/ITGA2/ITGA5/CD1A/TNF/HLA-DRB5/IL1B/CR2/CD34/CD19/IL3RA/CSF3R/MS4A1/CD14/HLA-DRB1/CSF1R/HLA-DRA/ITGB3/ITGAM/IL4R/CSF1/CD38/IL1R2/CD33 |
| SETDB1 | KEGG_VIRAL_MYOCARDITIS | 68 | -0.409893621 | -1.733862527 | 0.000935333 | 0.000935333 | 0.010651161 | 3500 | HLA-DQB1/CD55/ABL2/CD28/MYH11/PRF1/HLA-DOA/CCND1/CASP3/HLA-DRB5/EIF4G3/MYH10/RAC2/HLA-G/HLA-C/HLA-DRB1/ITGAL/ICAM1/HLA-B/HLA-DPA1/BID/HLA-DRA/HLA-A/CD86/CAV1/HLA-F/CD40/HLA-DPB1/ITGB2/CYCS |
| SETDB1 | KEGG_COMPLEMENT_AND_COAGULATION_CASCADES | 69 | -0.400391053 | -1.701179722 | 0.001466515 | 0.001466515 | 0.015308362 | 4063 | C3AR1/SERPINA1/BDKRB2/C4BPB/CD55/A2M/C8B/VWF/C4B/C4A/BDKRB1/PROC/PROS1/CR2/THBD/F2R/C3/PLAU/C5AR1/CFH/C1QB/C1QC/PLG/PLAT/C1QA/F13A1/CFI/PLAUR/CFB |
| SETDB1 | KEGG_FATTY_ACID_METABOLISM | 42 | 0.46909367 | 1.758407793 | 0.001876547 | 0.001876547 | 0.018081705 | 2379 | CPT1A/HADHB/ACSL5/ACOX3/ECHS1/ACADVL/ACSL3/ACAT2/ECI2/CPT2/ACOX1/GCDH/ACADL/ADH6/ACSL4 |
| SETDB1 | KEGG_ANTIGEN_PROCESSING_AND_PRESENTATION | 73 | -0.376988793 | -1.617840761 | 0.00206213 | 0.00206213 | 0.018450634 | 3714 | PDIA3/CD8B/HLA-DQB1/KLRC3/TAPBP/RFX5/CIITA/HSPA6/KLRD1/HLA-DOA/HSP90AB1/CREB1/CTSS/CD74/KIR3DL3/HLA-DRB5/IFI30/HLA-G/HLA-C/B2M/PSME2/HLA-DRB1/NFYB/RFXAP/HLA-B/HLA-DPA1/HLA-DRA/HLA-A/NFYA/HLA-F/HLA-DPB1 |
| SETDB1 | KEGG_AUTOIMMUNE_THYROID_DISEASE | 46 | -0.436436005 | -1.699145511 | 0.002804857 | 0.002804857 | 0.02342302 | 2829 | CD28/PRF1/HLA-DOA/HLA-DRB5/HLA-G/HLA-C/HLA-DRB1/HLA-B/HLA-DPA1/HLA-DRA/HLA-A/CD86/IL10/HLA-F/CD40/HLA-DPB1 |
| SETDB1 | KEGG_PROTEIN_EXPORT | 22 | -0.536464539 | -1.738697839 | 0.003949966 | 0.003949966 | 0.030924077 | 2977 | SEC61G/SEC61A1/OXA1L/SRP9/SEC63/SEC61B/SRPRB/SEC61A2/SRP19/SEC11A/SPCS2 |
| SETDB1 | KEGG_STEROID_BIOSYNTHESIS | 16 | 0.59679556 | 1.771411262 | 0.005373592 | 0.005373592 | 0.036020487 | 3974 | LSS/TM7SF2/EBP/SQLE/FDFT1/MSMO1/HSD17B7/NSDHL/DHCR7/CYP27B1/DHCR24/CEL/CYP51A1 |
| SETDB1 | KEGG_LEISHMANIA_INFECTION | 68 | -0.376468353 | -1.592472623 | 0.005424353 | 0.005424353 | 0.036020487 | 3502 | MYD88/HLA-DQB1/MARCKSL1/TGFB2/IFNG/HLA-DOA/NFKB1/TNF/HLA-DRB5/IL1B/CYBA/MAPK12/JAK2/HLA-DRB1/NCF2/C3/HLA-DPA1/FCGR3A/NCF1/HLA-DRA/ITGAM/IL10/PRKCB/HLA-DPB1/ITGB2/FCGR2A/TGFB3/FCGR2C/NCF4 |
| SETDB1 | KEGG_TYPE_I_DIABETES_MELLITUS | 41 | -0.460152699 | -1.76175867 | 0.005463612 | 0.005463612 | 0.036020487 | 3855 | FASLG/IL1A/HLA-DQB1/IFNG/CD28/PRF1/HLA-DOA/PTPRN2/TNF/HLA-DRB5/IL1B/HLA-G/HLA-C/HLA-DRB1/HLA-B/HLA-DPA1/HLA-DRA/HLA-A/CD86/HLA-F/HLA-DPB1 |
| SETDB1 | KEGG_TYPE_II_DIABETES_MELLITUS | 46 | -0.399794742 | -1.556492668 | 0.011030368 | 0.011030368 | 0.069084938 | 4872 | PIK3CA/INS/CACNA1A/MAFA/SOCS1/MTOR/PIK3R1/CACNA1C/PRKCE/CACNA1B/PIK3R3/PIK3R5/SOCS3/TNF/PIK3CG/SLC2A4/HK3/HK1/IRS1/PIK3CD/SOCS4 |
| SETDB1 | KEGG_TERPENOID_BACKBONE_BIOSYNTHESIS | 15 | 0.579049061 | 1.701722871 | 0.01210527 | 0.01210527 | 0.072206873 | 2724 | HMGCS2/PMVK/IDI1/ACAT2/MVK/HMGCS1/HMGCR/DHDDS |
| SETDB1 | KEGG_GAP_JUNCTION | 86 | -0.328855248 | -1.463935708 | 0.013707872 | 0.013707872 | 0.078049603 | 2250 | TUBA1B/SRC/PDGFD/PLCB2/ADCY9/TUBA1A/TUBB2B/HTR2B/LPAR1/TUBB/GUCY1A2/TJP1/PRKCB/KRAS/ADCY4/GNAI2/TUBB6/MAP2K2/TUBB3/GJA1 |
| SETDB1 | KEGG_GLYCOSYLPHOSPHATIDYLINOSITOL_GPI_ANCHOR_BIOSYNTHESIS | 25 | 0.504485454 | 1.710253777 | 0.015985173 | 0.015985173 | 0.087058837 | 2854 | PIGB/PIGO/PIGG/PIGT/PIGZ/PIGA/PIGV/PIGP/PIGS/PIGF/PIGN/GPAA1/PIGY |
| SETDB1 | KEGG_ASTHMA | 28 | -0.456142195 | -1.593477621 | 0.018415483 | 0.018415483 | 0.092759241 | 2054 | HLA-DOA/TNF/HLA-DRB5/RNASE3/HLA-DRB1/HLA-DPA1/FCER1G/HLA-DRA/IL10/CD40/HLA-DPB1 |
| SETDB1 | KEGG_P53_SIGNALING_PATHWAY | 65 | -0.344099386 | -1.445918786 | 0.018512874 | 0.018512874 | 0.092759241 | 2941 | CCNE2/STEAP3/GADD45A/ATM/CCND1/CASP3/CDK2/RRM2/CHEK1/IGFBP3/CDKN2A/BAX/CCND3/BID/PMAIP1/MDM4/SHISA5/CHEK2/SESN3/PTEN/THBS1/CYCS/CCND2 |
| SETDB1 | KEGG_ALPHA_LINOLENIC_ACID_METABOLISM | 18 | 0.507002262 | 1.569243403 | 0.019494369 | 0.019494369 | 0.093920241 | 4108 | PLA2G4A/PLA2G10/PLA2G6/ACOX3/ACOX1/JMJD7-PLA2G4B/FADS2/PLA2G2E/PLA2G2F/PLA2G12A |
| SETDB1 | KEGG_PROPANOATE_METABOLISM | 31 | 0.439334713 | 1.548574137 | 0.022519892 | 0.022519892 | 0.10447825 | 3104 | MCEE/ALDH6A1/SUCLA2/ECHS1/ACACA/ACAT2/SUCLG1/ACSS1/PCCA/ACSS3/HIBCH/ACSS2 |
| SETDB1 | KEGG_RENAL_CELL_CARCINOMA | 66 | -0.341426337 | -1.436695515 | 0.025685592 | 0.025685592 | 0.111212457 | 3845 | EGLN3/HGF/PIK3R1/ARNT2/TGFB2/PIK3R3/PIK3R5/ETS1/AKT3/VEGFB/MET/CRKL/PIK3CG/PTPN11/EPAS1/PAK1/TGFA/EGLN2/KRAS/TGFB3/VEGFA/RAP1B/MAP2K2/PIK3CD |
| SETDB1 | KEGG_AMINOACYL_TRNA_BIOSYNTHESIS | 22 | 0.481219422 | 1.582932941 | 0.025747086 | 0.025747086 | 0.111212457 | 5170 | IARS2/AARS2/YARS2/FARSB/WARS2/PARS2/VARS2/EARS2/LARS2/FARS2/SEPSECS |
| SETDB1 | KEGG_PRION_DISEASES | 35 | -0.395934534 | -1.463405531 | 0.030417125 | 0.030417125 | 0.127004838 | 1793 | IL1B/LAMC1/EGR1/BAX/C1QB/C1QC/C1QA/PRNP/NCAM2/MAP2K2 |
| SETDB1 | KEGG_B_CELL_RECEPTOR_SIGNALING_PATHWAY | 74 | -0.321518501 | -1.391780272 | 0.03277572 | 0.03277572 | 0.132438393 | 2796 | NFATC3/PIK3R3/PIK3R5/VAV2/VAV3/NFKB1/AKT3/LILRB3/PIK3CG/RAC2/CR2/CD19/IFITM1/CARD11/BTK/INPP5D/PRKCB/KRAS/PIK3AP1/MAP2K2/PIK3CD/LYN |
| SETDB1 | KEGG_NOD_LIKE_RECEPTOR_SIGNALING_PATHWAY | 60 | -0.345165461 | -1.420923956 | 0.038275671 | 0.038275671 | 0.149829106 | 3923 | CCL5/CARD9/MEFV/PSTPIP1/TAB3/CASP5/NLRC4/HSP90AB1/CARD6/TRIP6/IL18/NFKB1/TNF/IL1B/CARD8/MAPK12/NLRP1/NAIP/PYCARD/CASP1/SUGT1/NLRP3/PYDC1 |
| SETDB1 | KEGG_STEROID_HORMONE_BIOSYNTHESIS | 45 | 0.374280555 | 1.447907642 | 0.045370777 | 0.045370777 | 0.172220813 | 5074 | SULT1E1/HSD11B2/HSD17B2/HSD17B8/SULT2B1/STS/UGT2B7/HSD17B7/UGT2B11/UGT2B10/HSD11B1/AKR1C3/HSD3B1/AKR1C4/CYP11B2/UGT2A1/SRD5A2/CYP19A1/CYP7A1/HSD17B1 |
| SETDB1 | KEGG_GLIOMA | 65 | -0.322046899 | -1.353253391 | 0.046888677 | 0.046888677 | 0.172747757 | 5126 | PLCG2/PDGFB/HRAS/SHC1/RB1/PIK3CA/CALML3/CDK6/PDGFA/E2F2/MTOR/SHC2/PLCG1/CDK4/SHC3/PIK3R1/PIK3R3/SHC4/CCND1/PIK3R5/CALM2/AKT3/PIK3CG/CDKN2A/CALM3/TGFA/E2F3/PRKCB/KRAS/PTEN/MAP2K2/PIK3CD |
| SETDB1 | KEGG_SMALL_CELL_LUNG_CANCER | 84 | -0.298959732 | -1.327271924 | 0.049308705 | 0.049308705 | 0.17647326 | 3764 | ITGA2B/CDK4/PIK3R1/SKP2/CDKN2B/CCNE2/MYC/LAMB3/ITGA2/PIK3R3/CCND1/PIK3R5/LAMA3/CDK2/NFKB1/AKT3/CKS1B/PIAS4/PIK3CG/LAMC1/RXRA/TRAF3/E2F3/TRAF5/PTEN/LAMC2/PIK3CD/CYCS/LAMA4/BCL2 |

**Abbreviations:** NES, Normalized Enrichment Score
